# Supplementary material for: Controlled TfOH- or AuCl-catalyzed cycloisomerization and tandem hydrolytic defluorination of 1,2-allenyl perfluoroalkyl ketones
Source: Royal Society of Chemistry journal article supplement (doi:10.1039/c6qo00001k), 2016-01-01

# **Controlled TfOH- or AuCl-catalyzed cycloisomerization and tandem hydrolytic defluorination of 2,3-allenyl perfluoroalkyl ketones**

Can Xue, Xin Huang, Shangze Wu, Chunling Fu \*and Shengming Ma\*

Laboratory of Molecular Recognition and Synthesis, Department of Chemistry,  
Zhejiang University, Hangzhou 310027, Zhejiang, People's Republic of China

\* Corresponding author. Tel.: 86-21-55665687; Fax: 86-21-64167510.

[masm@sioc.ac.cn](mailto:masm@sioc.ac.cn)

## **Supporting Information**

### **Index**

1.  $^1\text{H}$  NMR,  $^{13}\text{C}$  NMR,  $^{19}\text{F}$  NMR and NOE Spectra of these Compounds S1

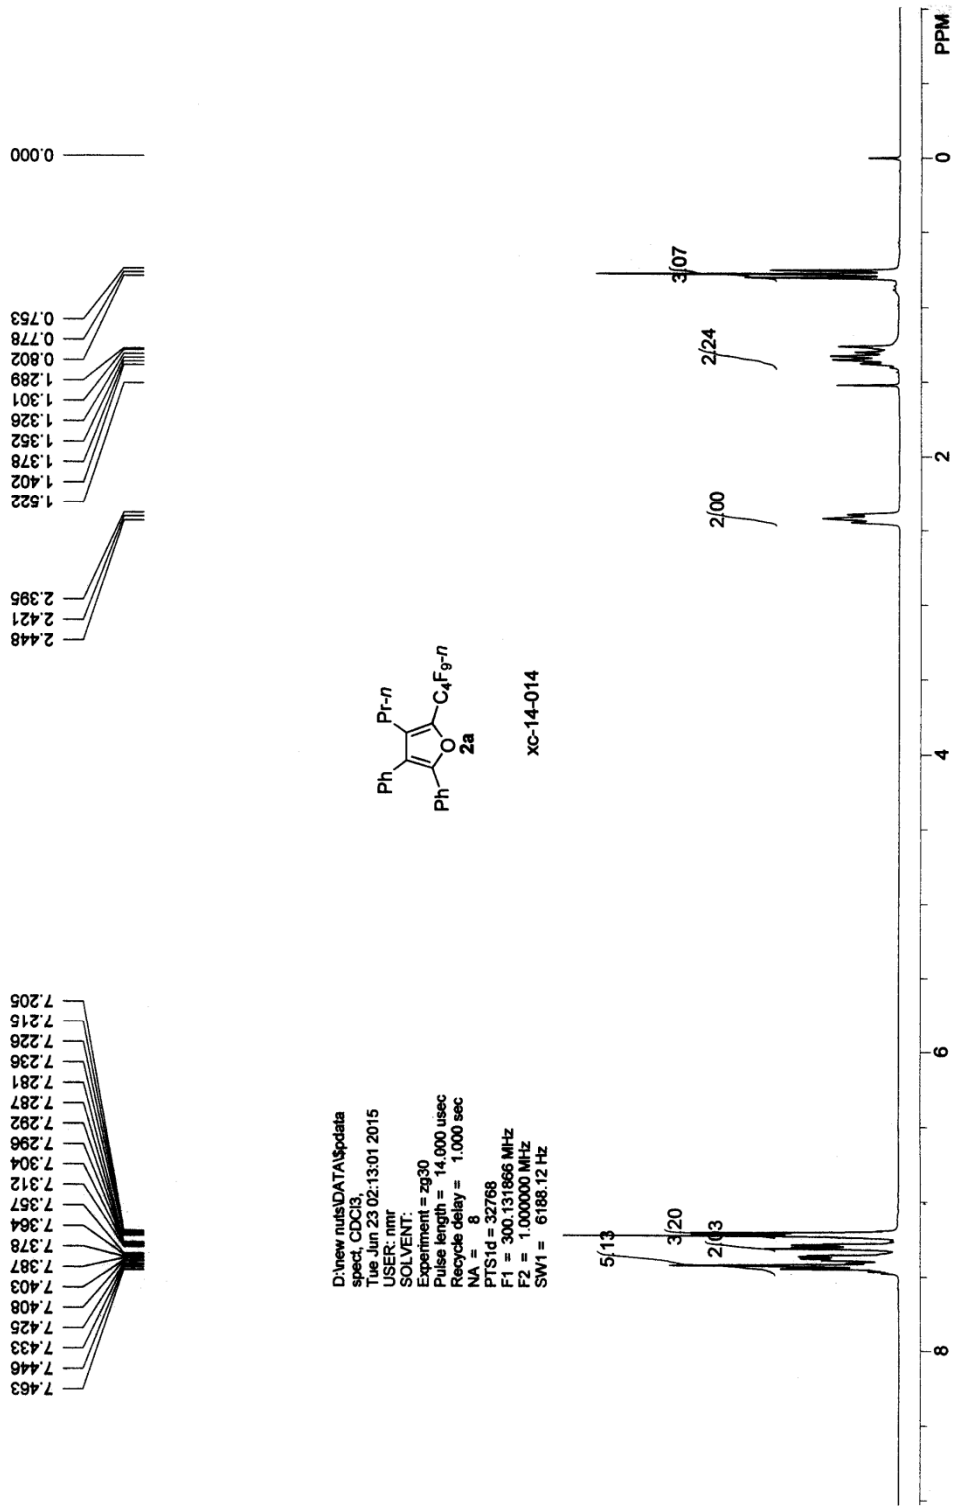

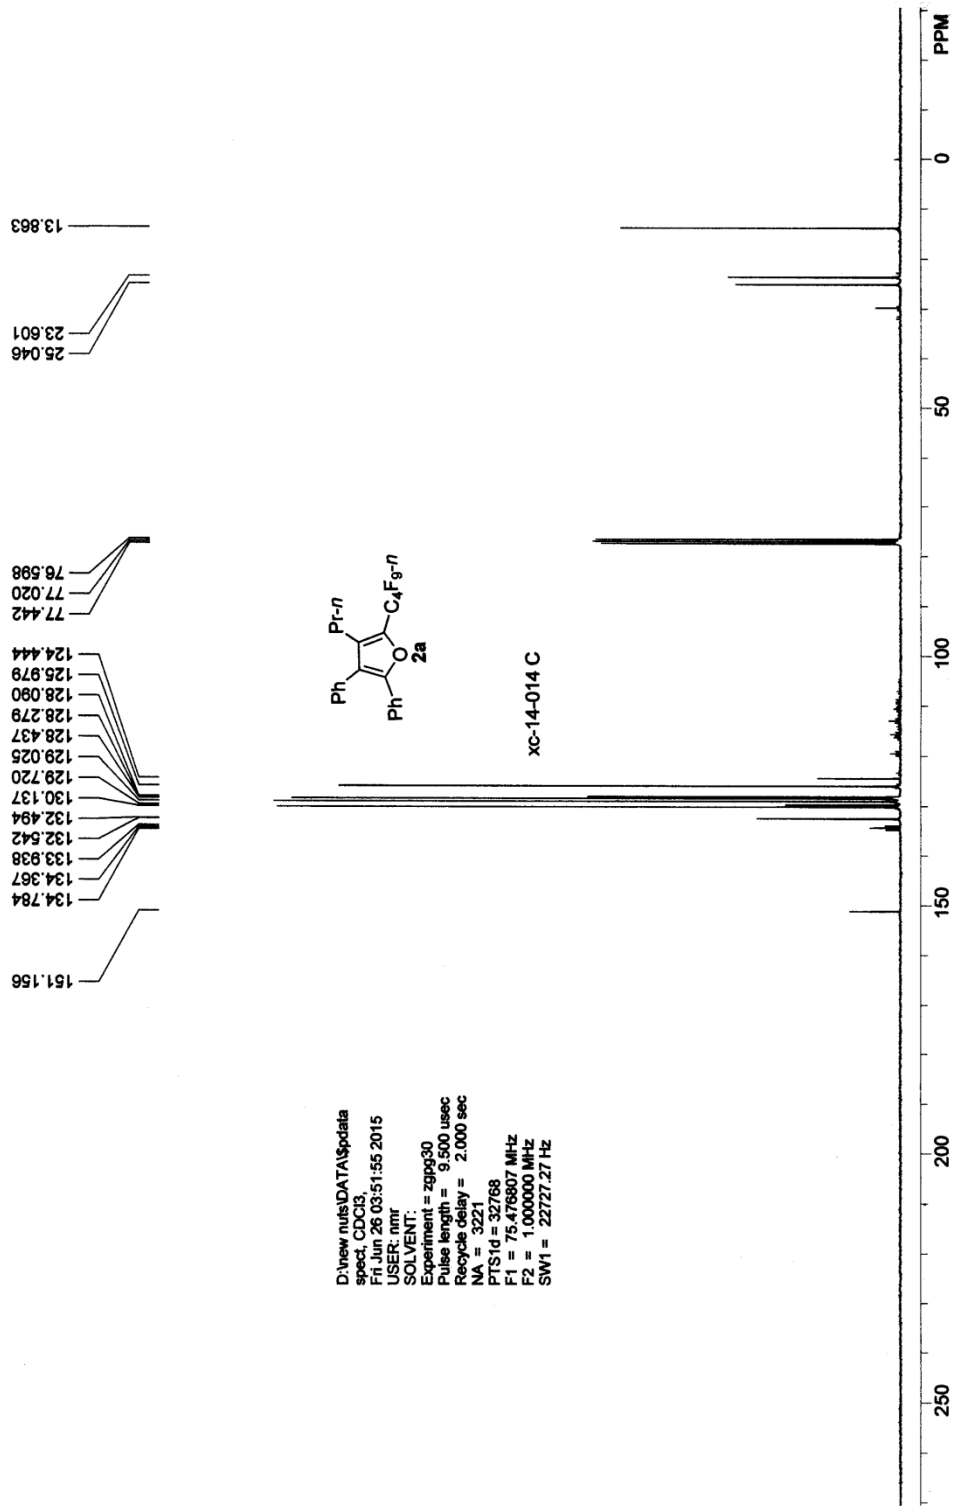

D:\new nuts\DATA\Spdata  
 spect, CDC13,  
 Fri Jun 26 03:51:55 2015  
 USER: nmr  
 SOLVENT:  
 Experiment = zapp30  
 Pulse length = 9.500 usec  
 Recycle delay = 2.000 sec  
 NA = 3221  
 P1 = 32768  
 F1 = 75.476807 MHz  
 F2 = 1.000000 MHz  
 SW1 = 22727.27 Hz

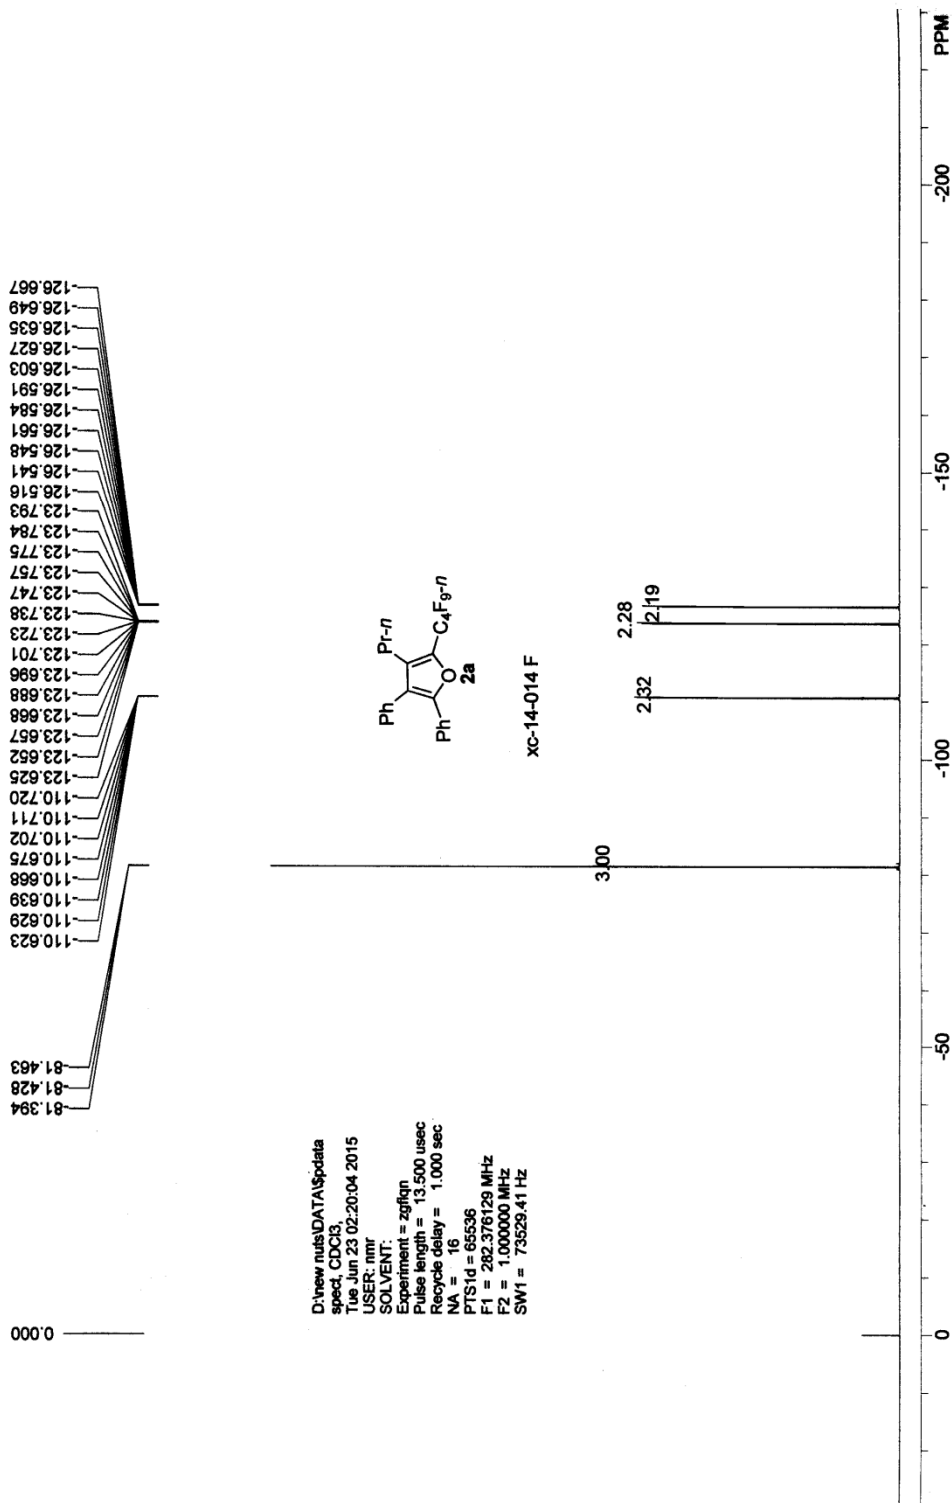

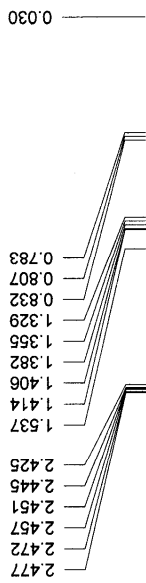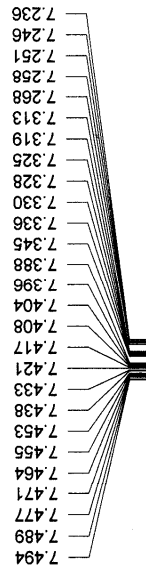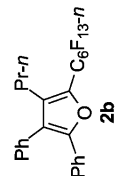

D:\new\_nuisDATA\spdata  
 spect, CDCI3,  
 Tue Feb 10 13:01:56 2015  
 USER: nmr  
 SOLVENT:  
 Experiment = zg30  
 Pulse length = 14,000 usec  
 Recycle delay = 1,000 sec  
 NA = 8  
 PTDId = 32768  
 F1 = 300.131866 MHz  
 F2 = 1,000,000 MHz  
 SW1 = 6188.12 Hz

xc-13-078

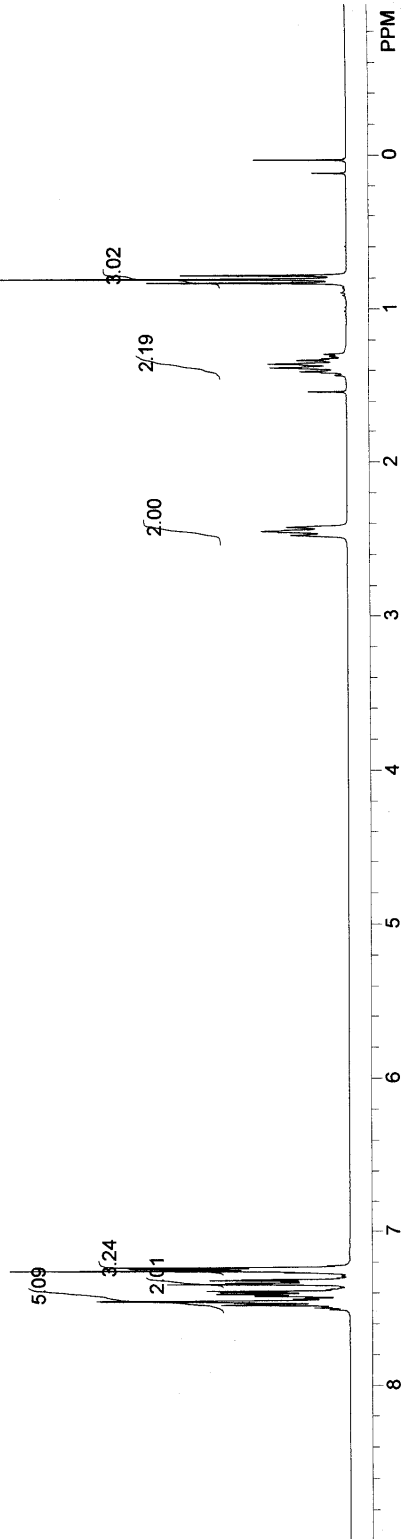

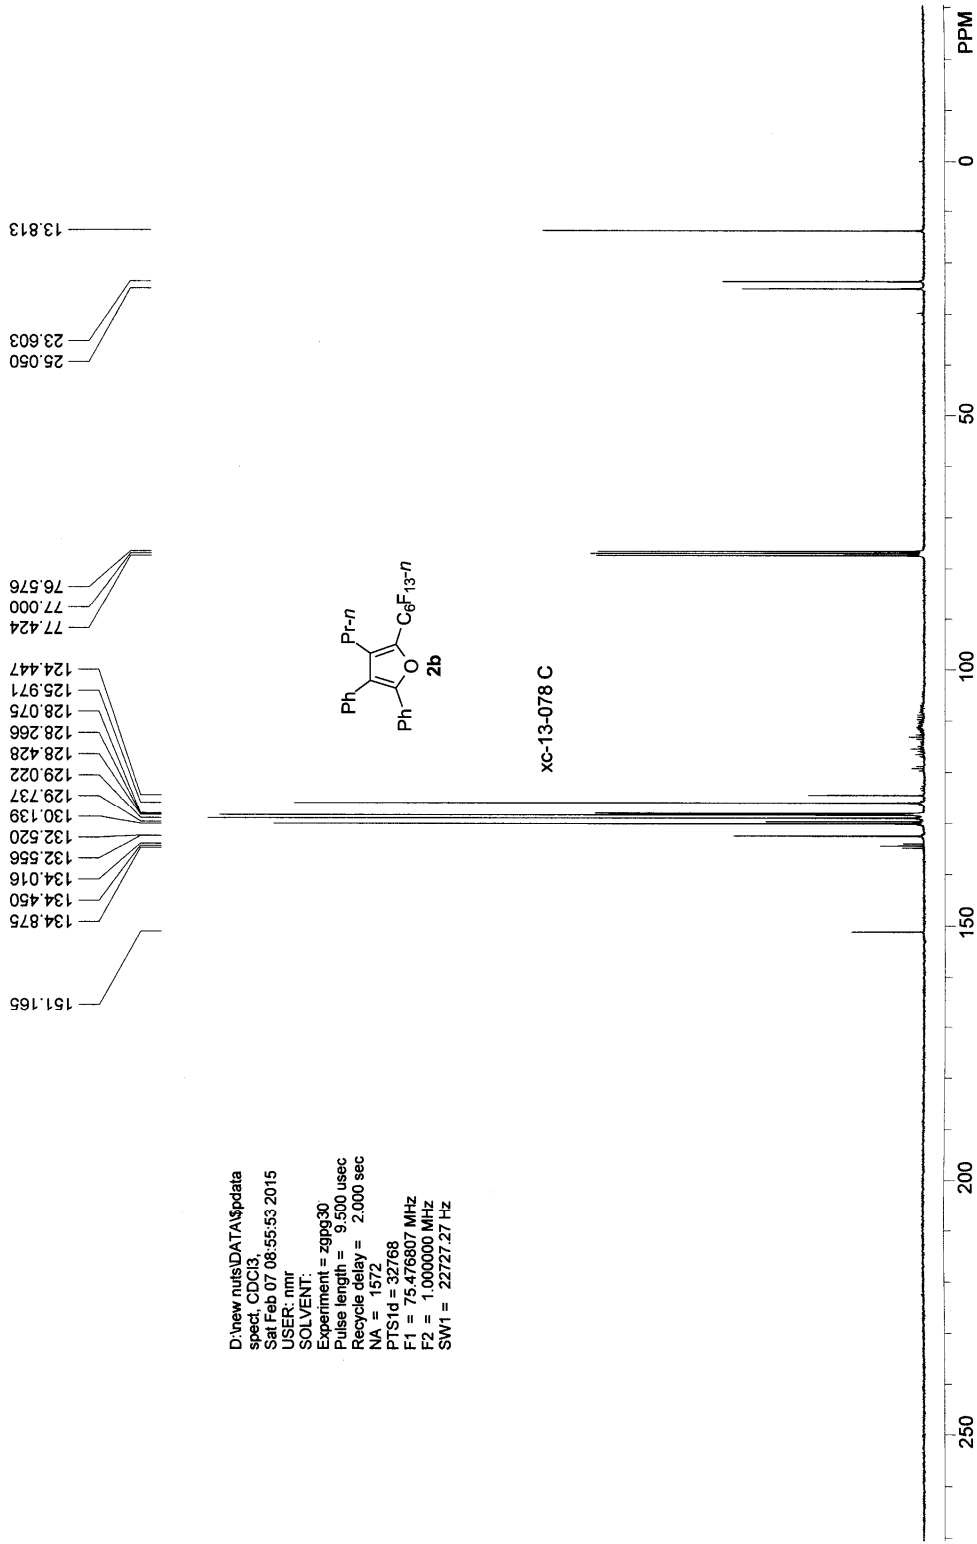

D:\new nutis\DATA\spdata  
 spect. CDC13  
 Sat Feb 07 08:55:53 2015  
 USER: mhir  
 SOLVENT:  
 Experiment = zrgp930  
 Pulse length = 9.500 usec  
 Recycle delay = 2.000 sec  
 NA = 1572  
 PTS1d = 32768  
 F1 = 75.476807 MHz  
 F2 = 1.000000 MHz  
 SW1 = 22727.27 Hz

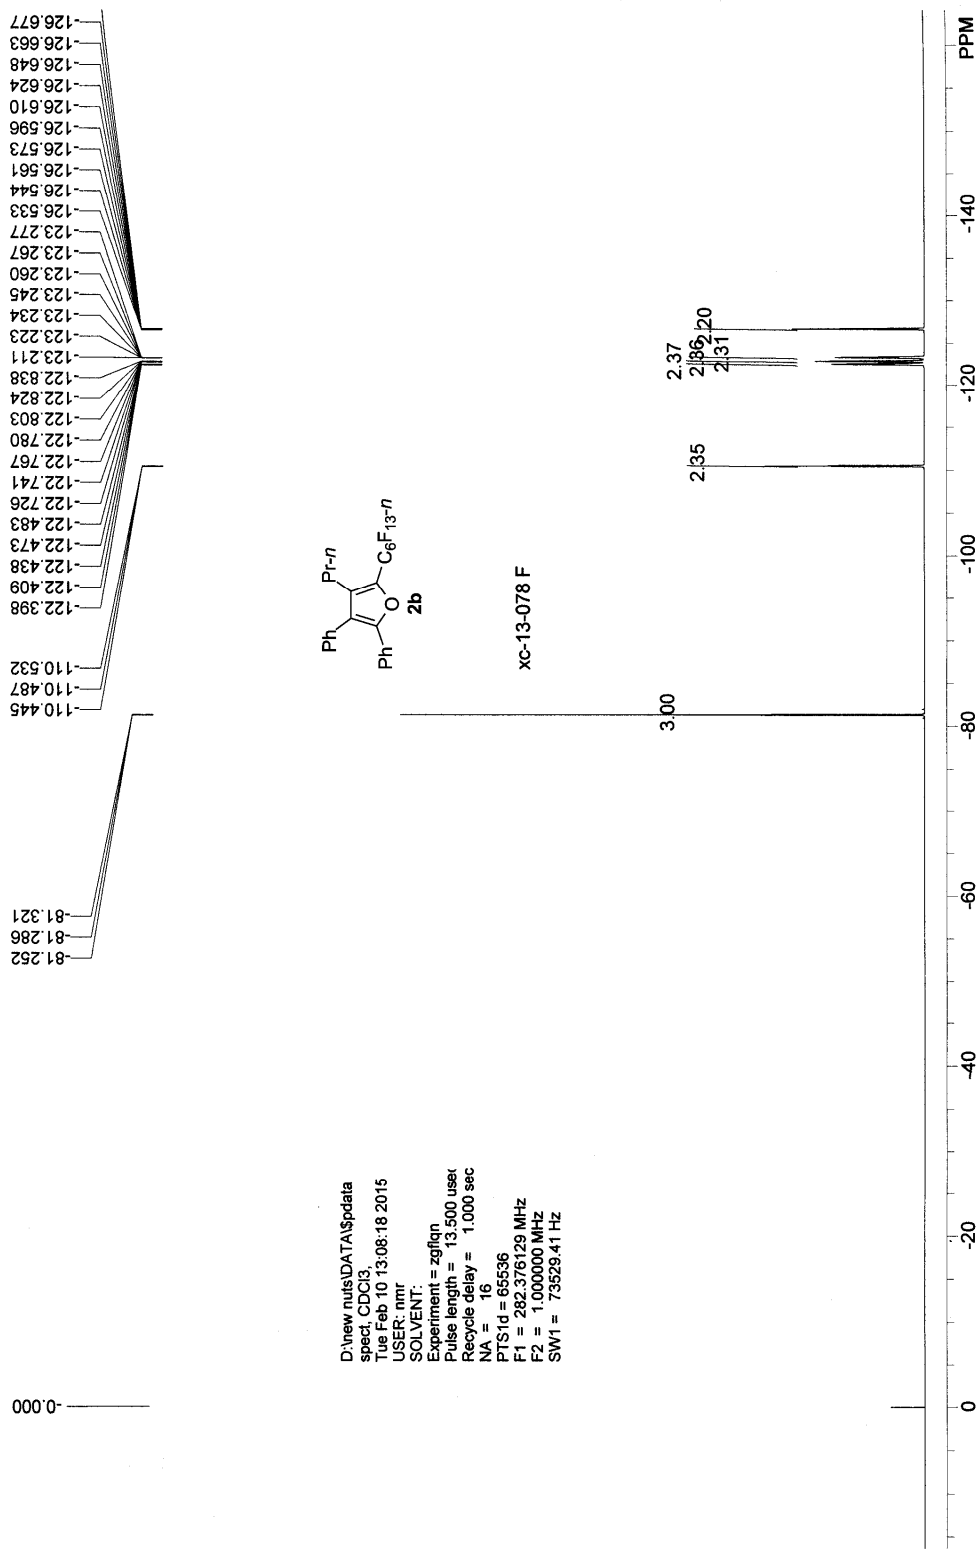

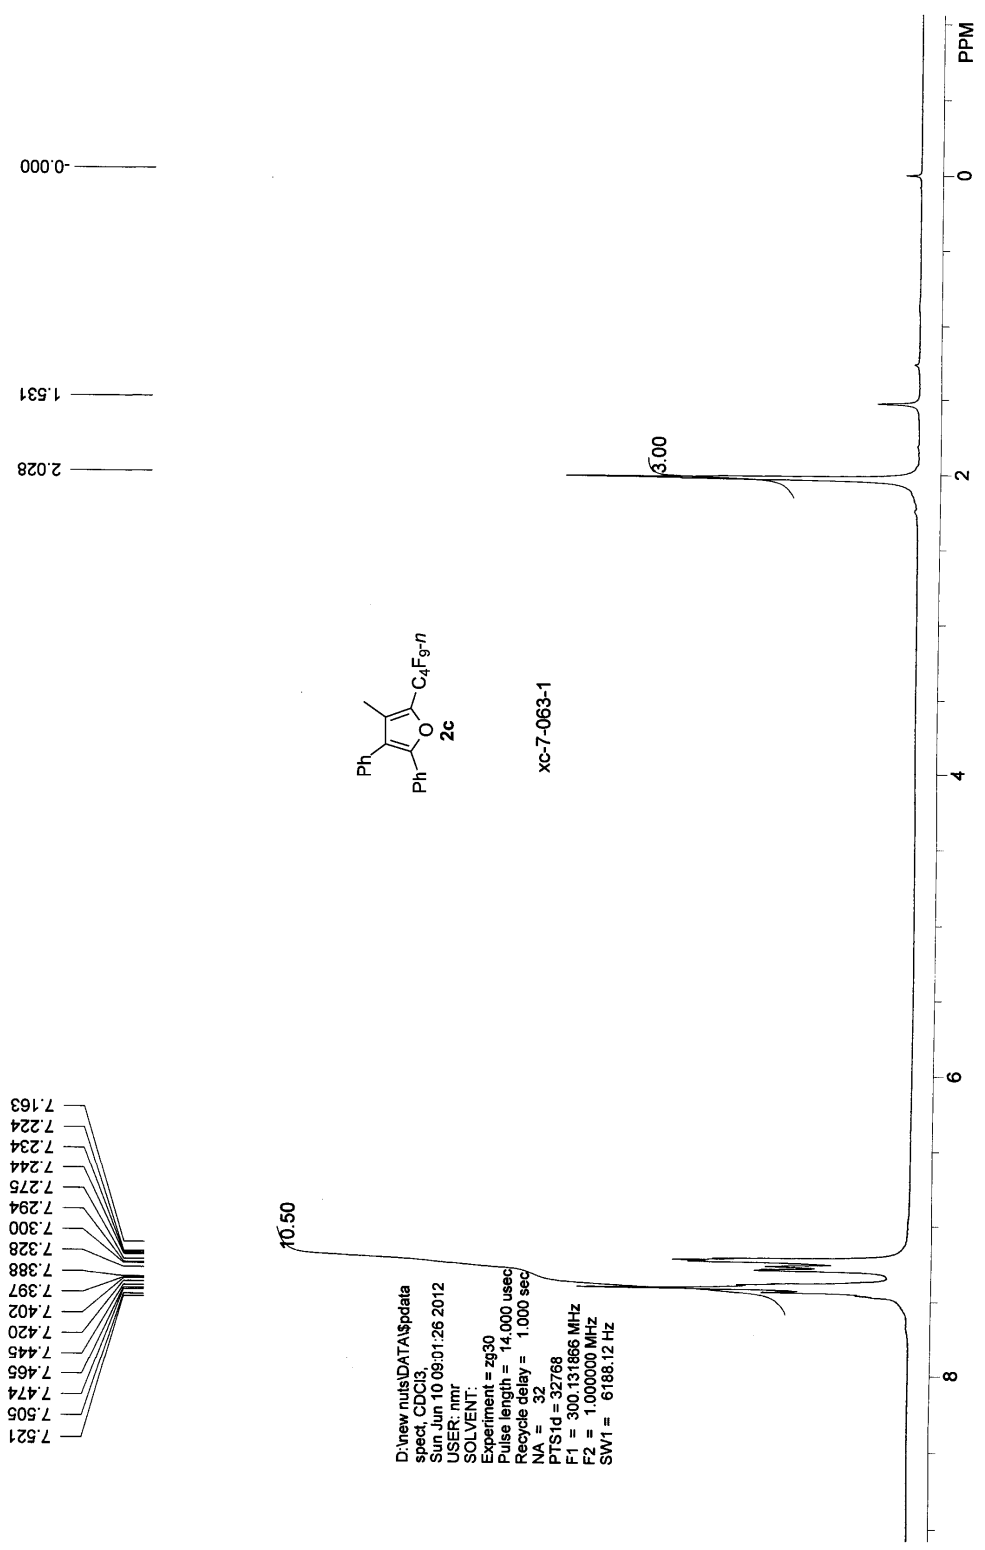



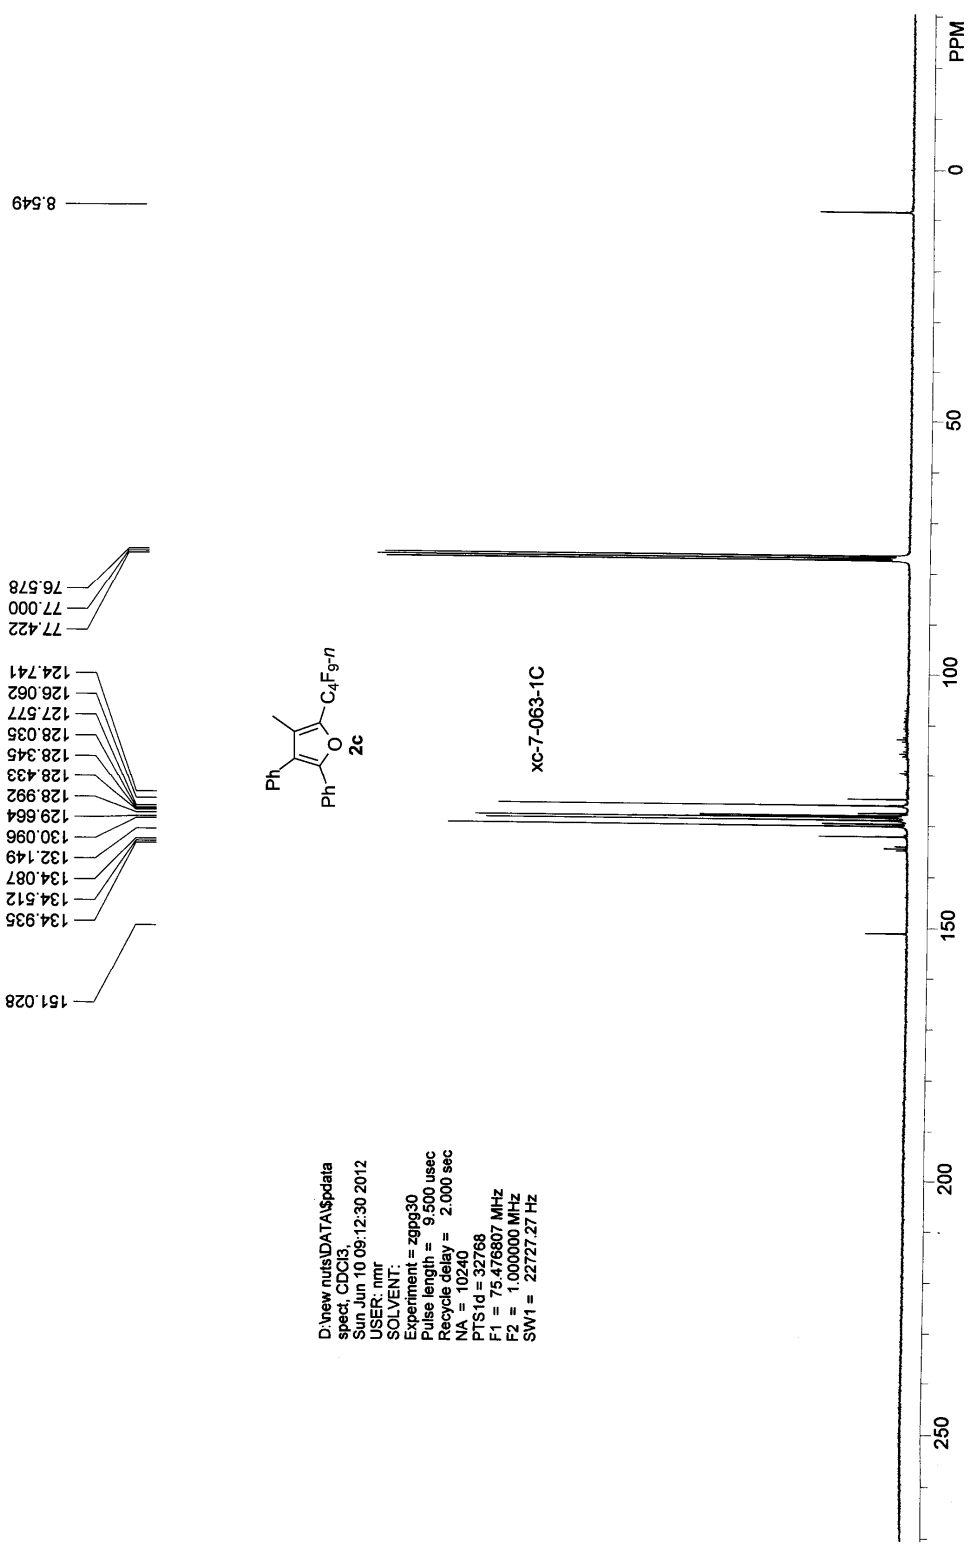

D:\new nuts\DATA\5pdata  
 spect, CDC13,  
 Sun Jun 10 09:12:30 2012  
 USER: nmr  
 SOLVENT:  
 Experiment = zppg30  
 Pulse length = 9.500 usec  
 Recycle delay = 2.000 sec  
 NA = 10240  
 P1S1d = 32768  
 F1 = 75.476807 MHz  
 F2 = 1.000000 MHz  
 SW1 = 22727.27 Hz

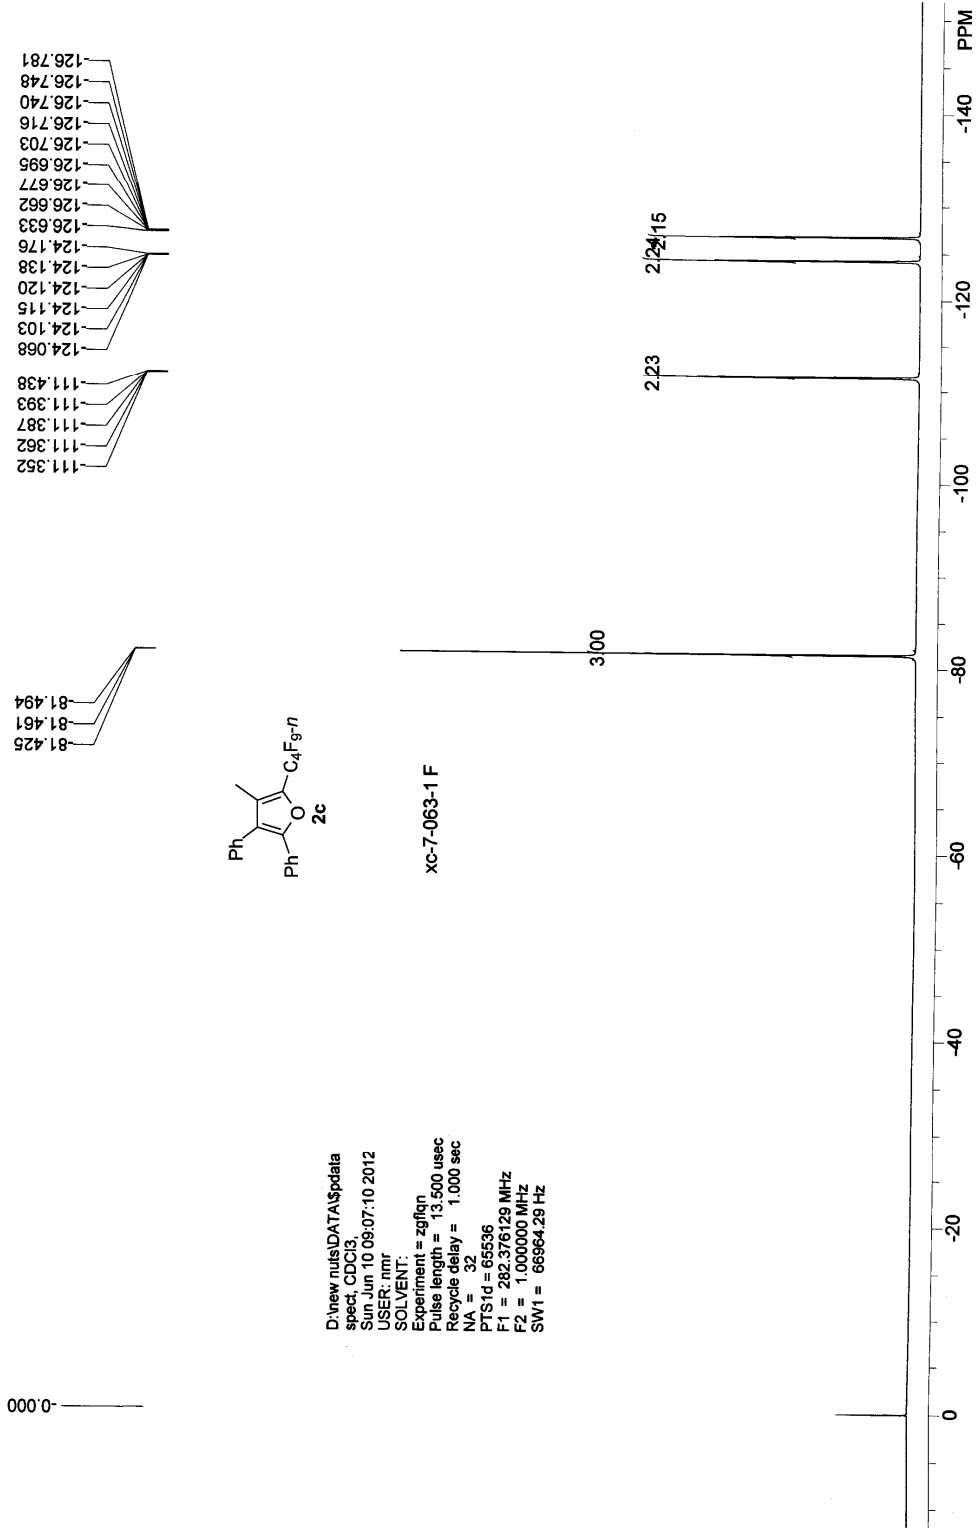

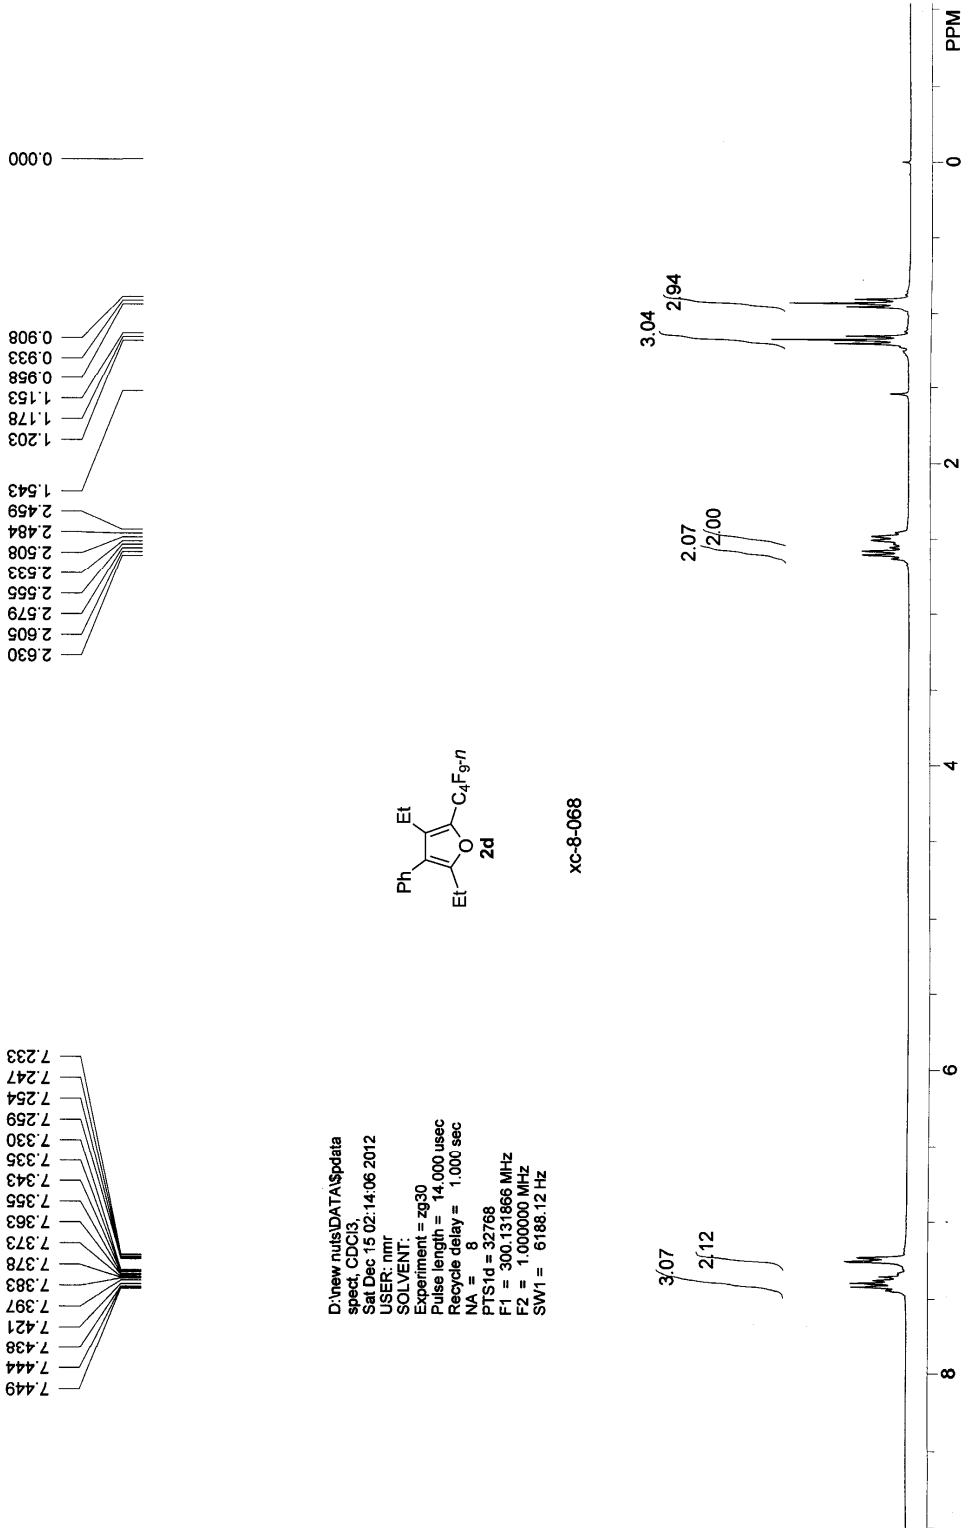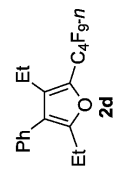

xc-8-068

D:\new nuts\DATA\pdata  
 spect, CDCl3,  
 Sat Dec 15 02:14:06 2012  
 USER: nmr  
 SOLVENT:  
 Experiment = z930  
 Pulse length = 14,000 usec  
 Recycle delay = 1,000 sec  
 NA = 8  
 P1S1d = 32768  
 F1 = 300.131866 MHz  
 F2 = 1.000000 MHz  
 SW1 = 6188.12 Hz

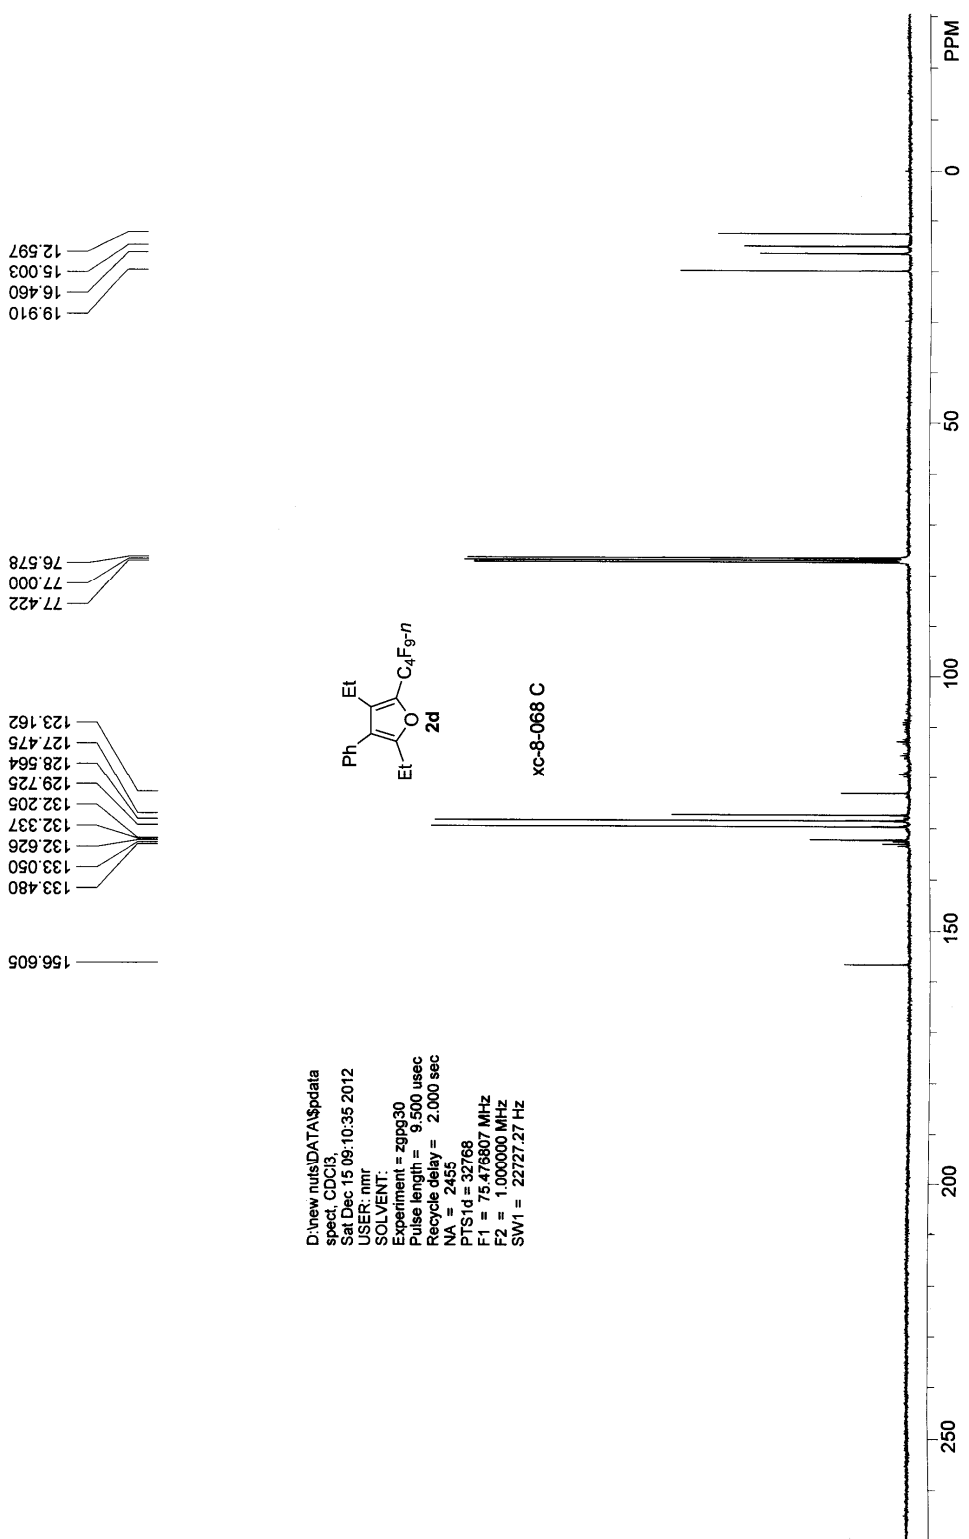

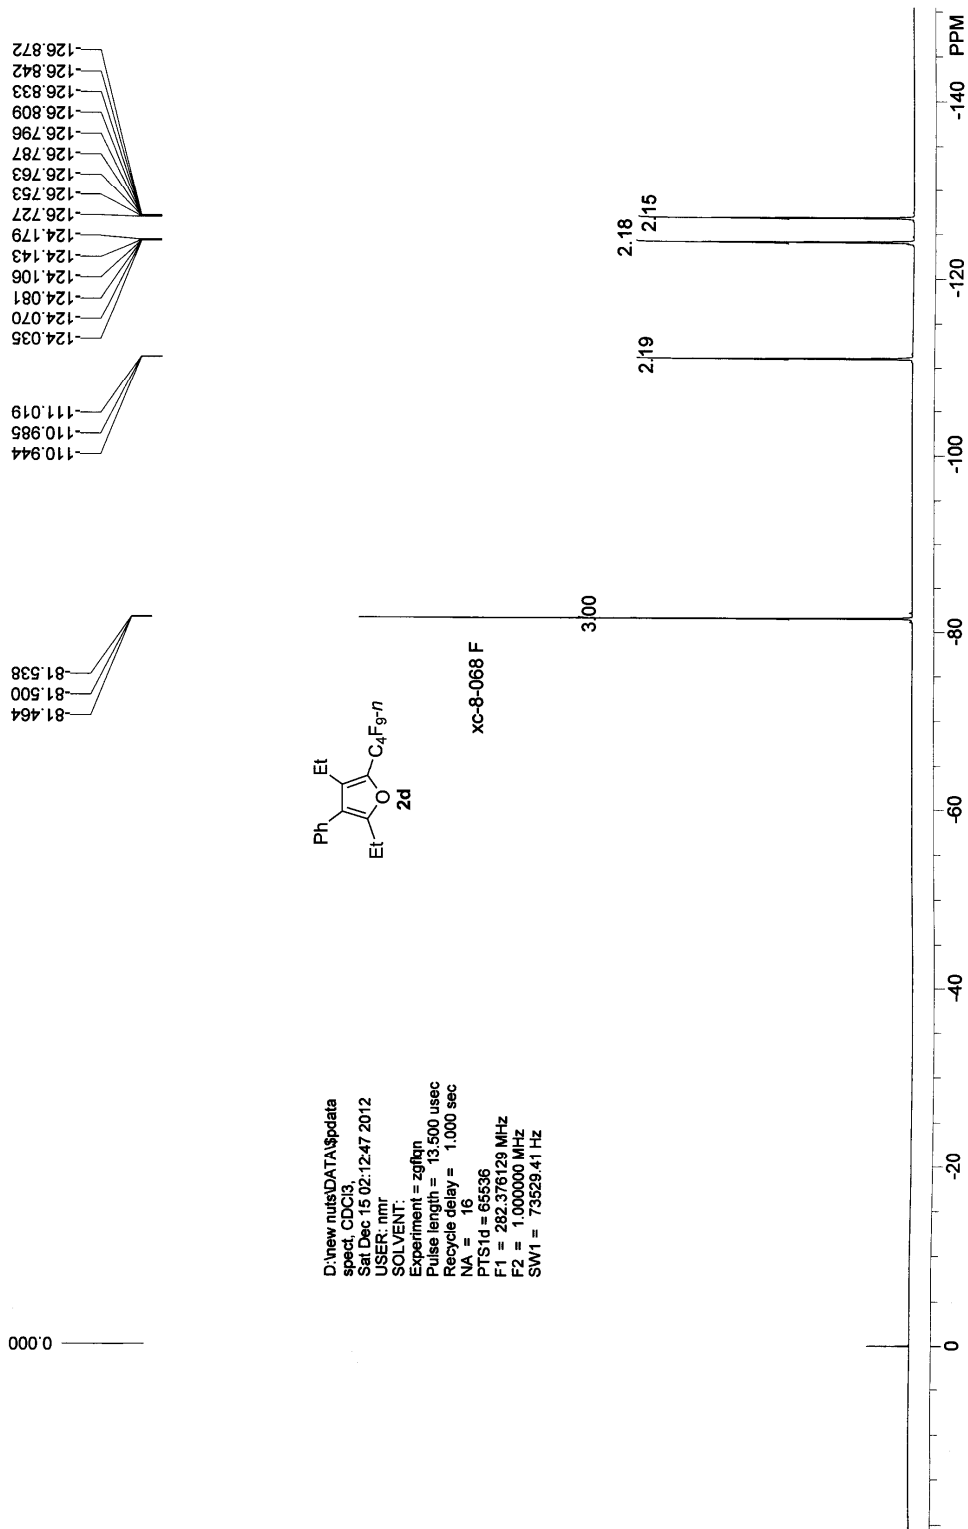

PDF  
**Complete**  
 Your Special Edition  
 complimentary  
 use period has ended.  
 Thank you for using  
 PDF Complete.  
 Click here to upgrade to  
 Unlimited Pages and 5 Star

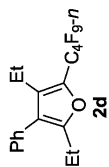

xc-8-068-noe

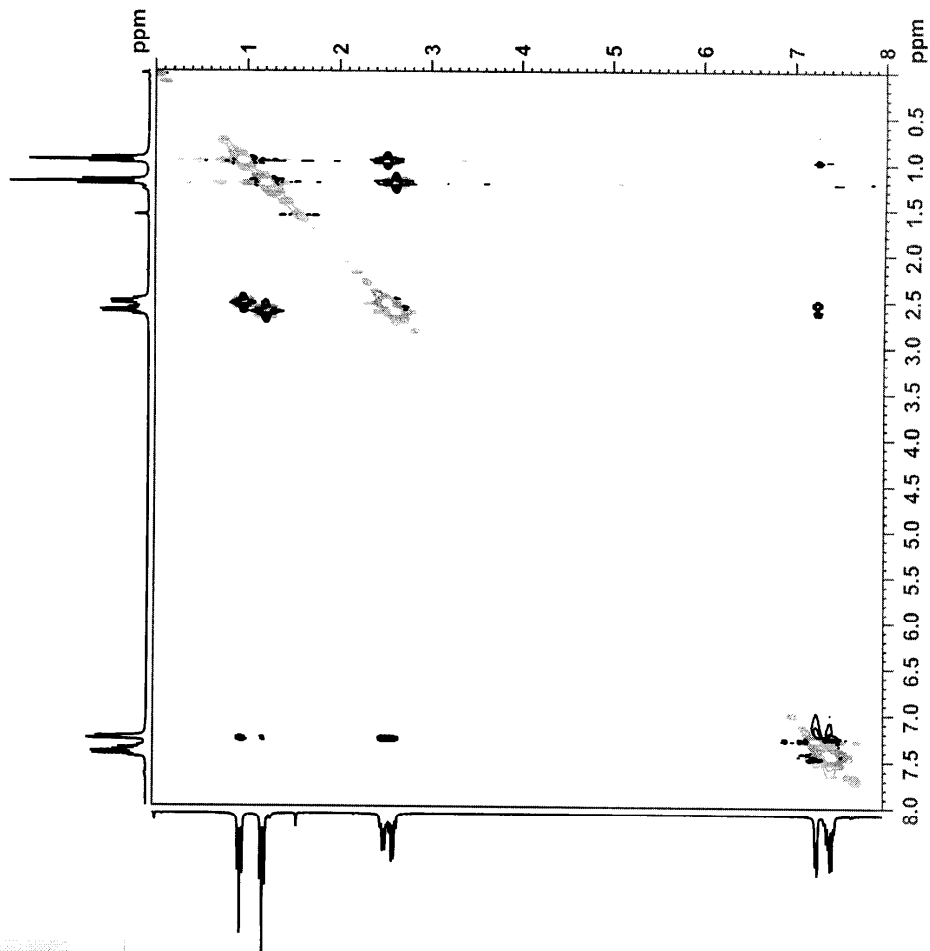

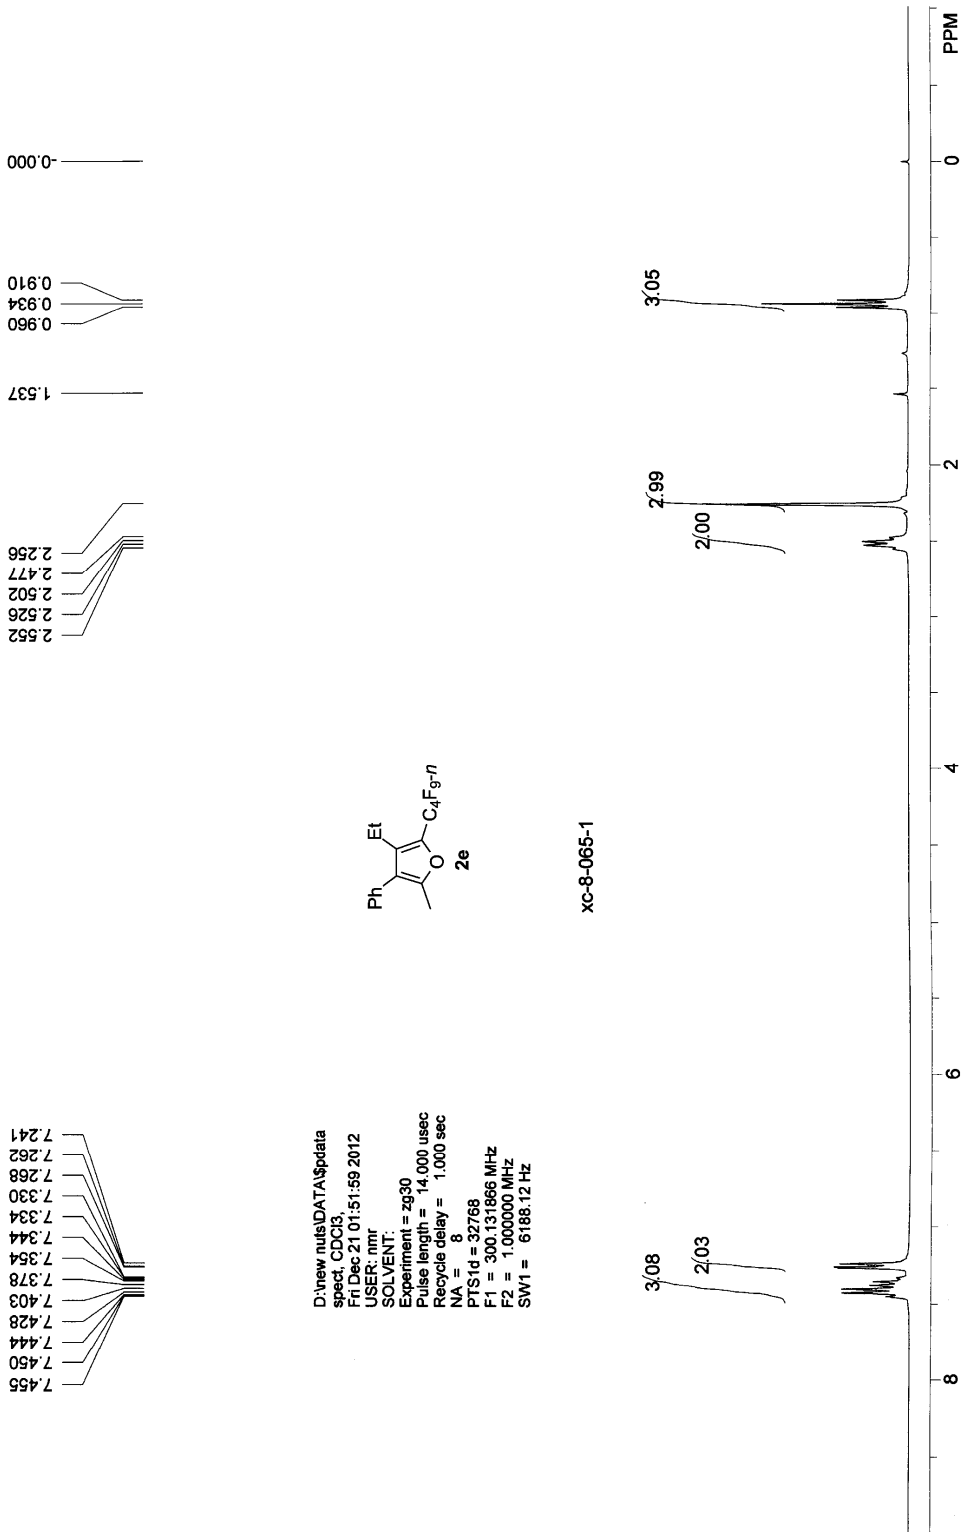

D:\new nmr\DATA\spdata  
 spect, CDCl3,  
 Fri Dec 21 03:53:24 2012  
 USER: nmr  
 SOLVENT:  
 Experiment = zgpg30  
 Pulse length = 9.500 usec  
 Recycle delay = 2.000 sec  
 NA = 2270  
 PTS1d = 32768  
 F1 = 75.476807 MHz  
 F2 = 1.000000 MHz  
 SW1 = 22727.27 Hz

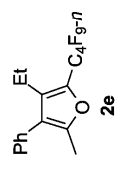

xc-8-065-1C

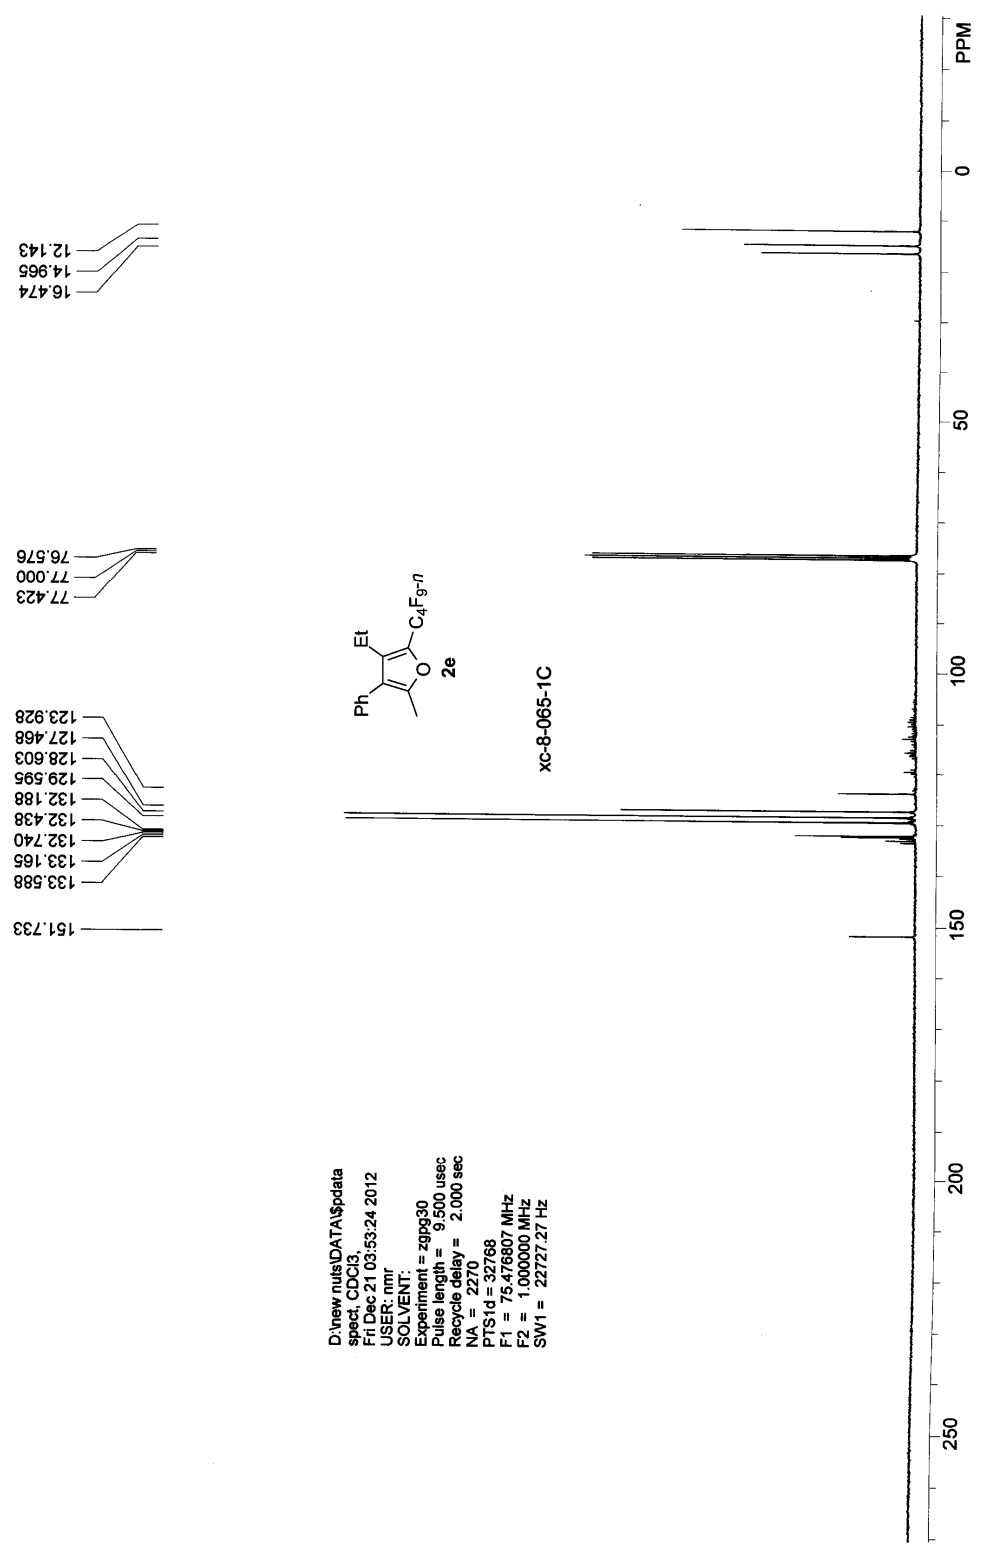



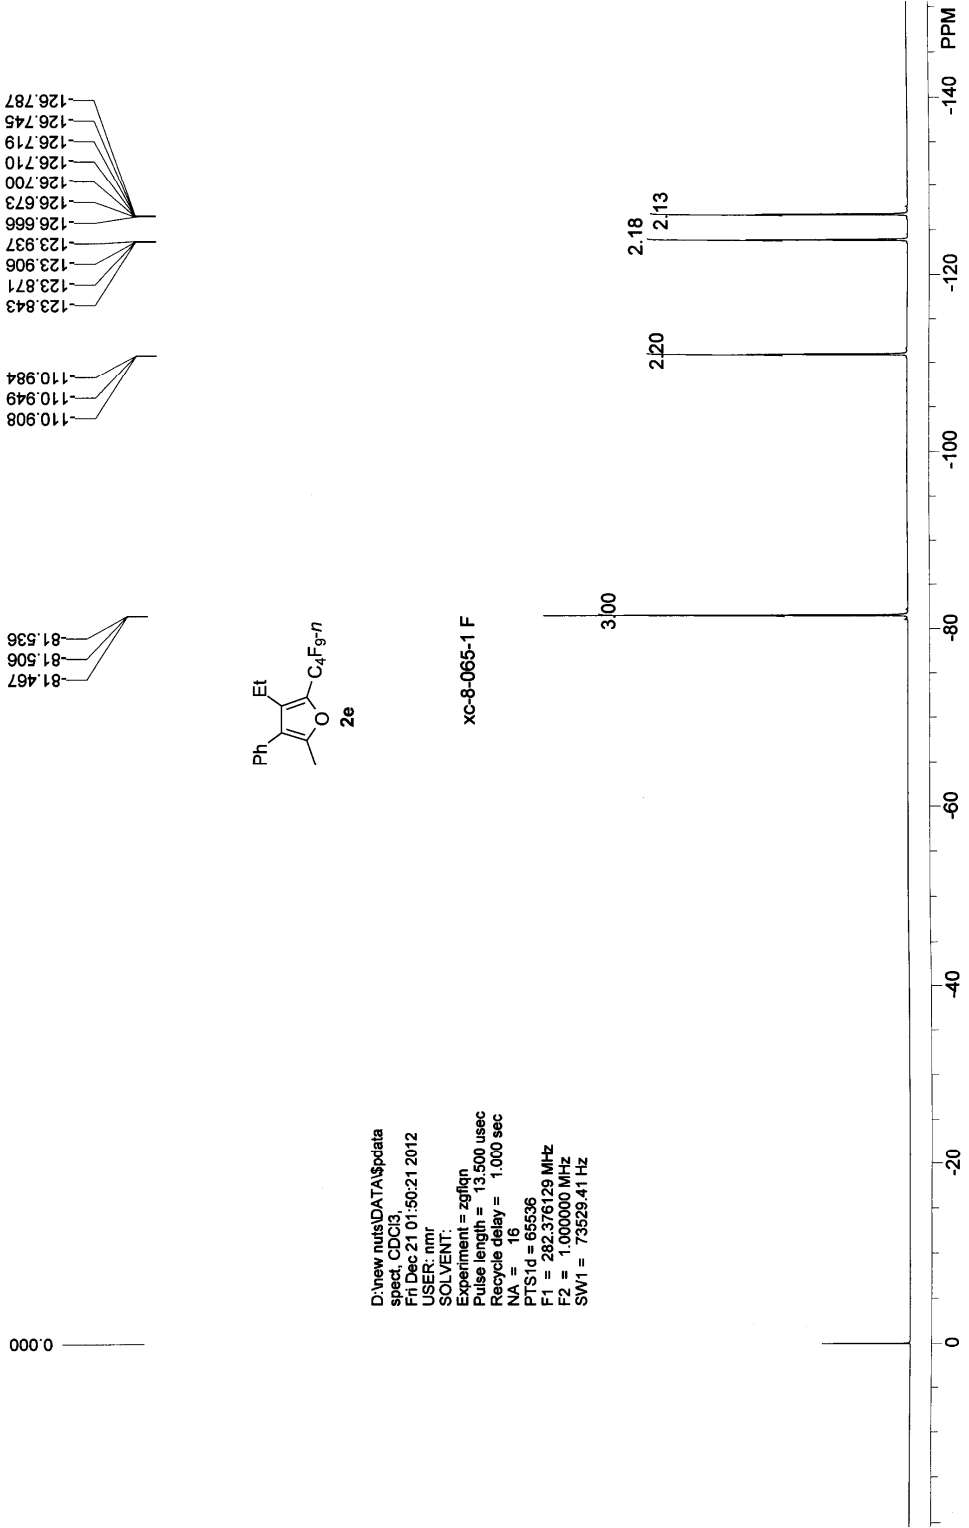

D:\new nus\DATA\spdata  
spect, CDCl<sub>3</sub>,  
Fri Dec 21 01:50:21 2012  
USER: nmr  
SOLVENT:  
Experiment = zgpgn  
Pulse length = 13.500 usec  
Recycle delay = 1.000 sec  
NA = 16  
PTS1d = 65536  
F1 = 282.376129 MHz  
F2 = 100.0000 MHz  
SWH = 73529.41 HZ

PDF Complete  
Your Special Edition complimentary use period has ended. Thank you for using PDF Complete.  
Click here to purchase Unlimited PDF Complete.

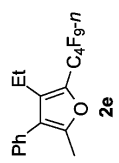

xc-8-065-noe

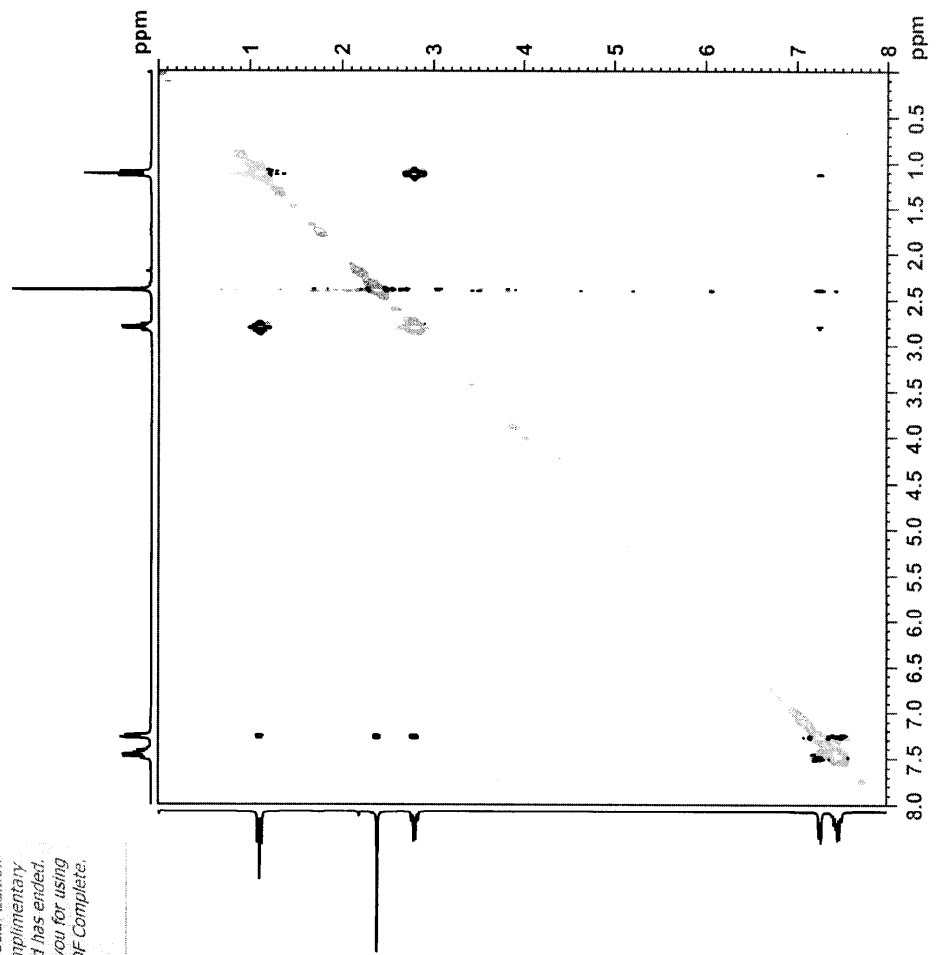

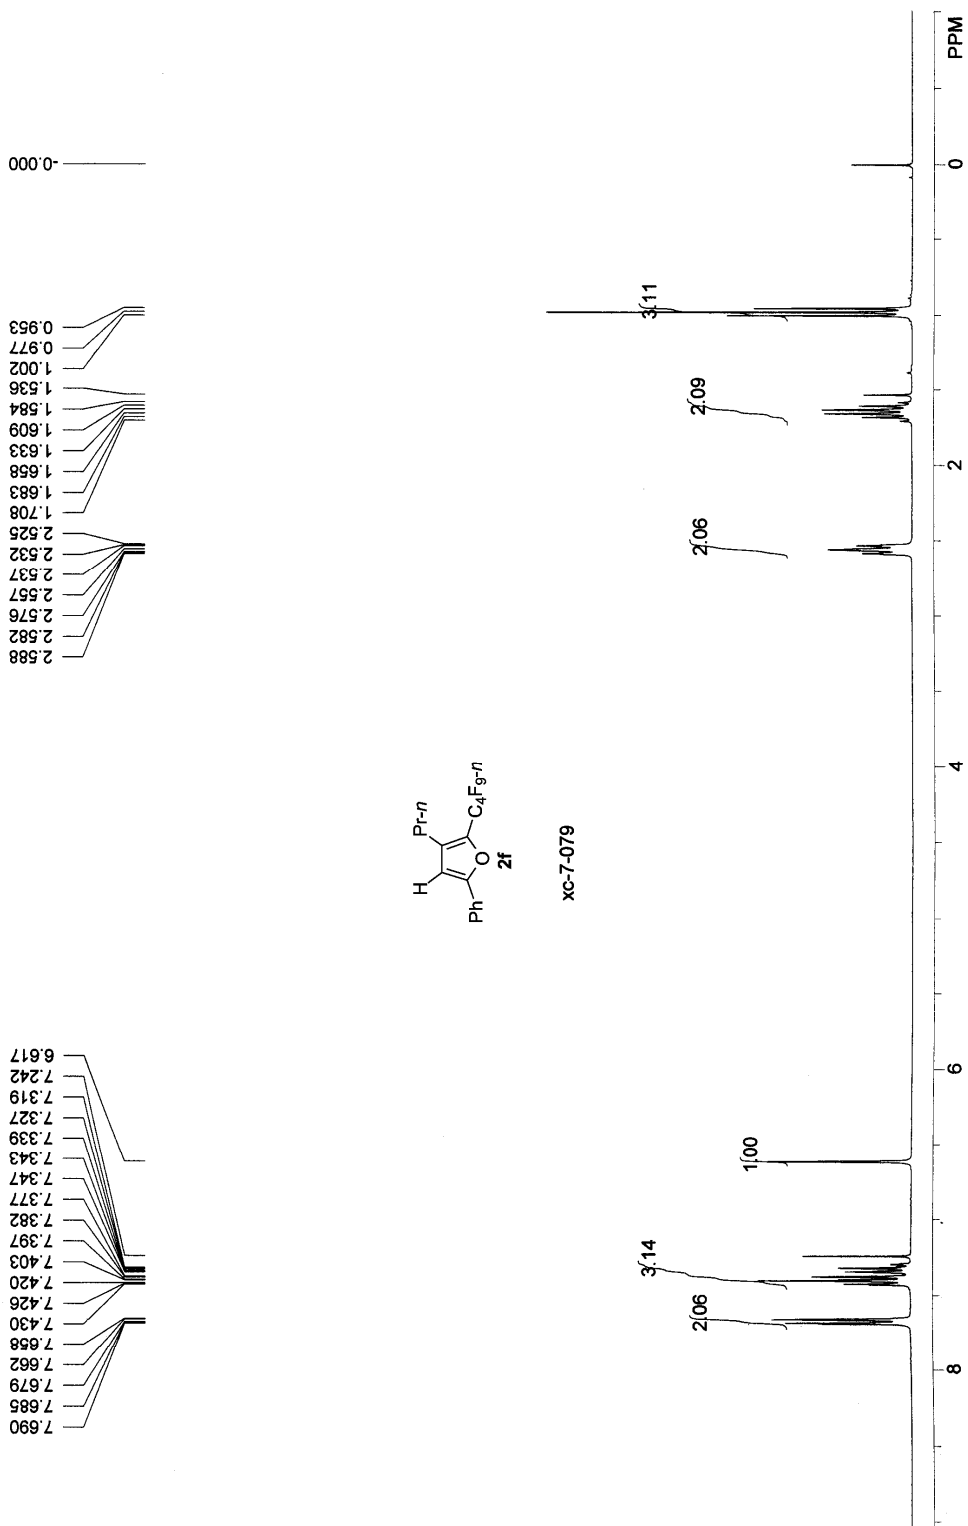

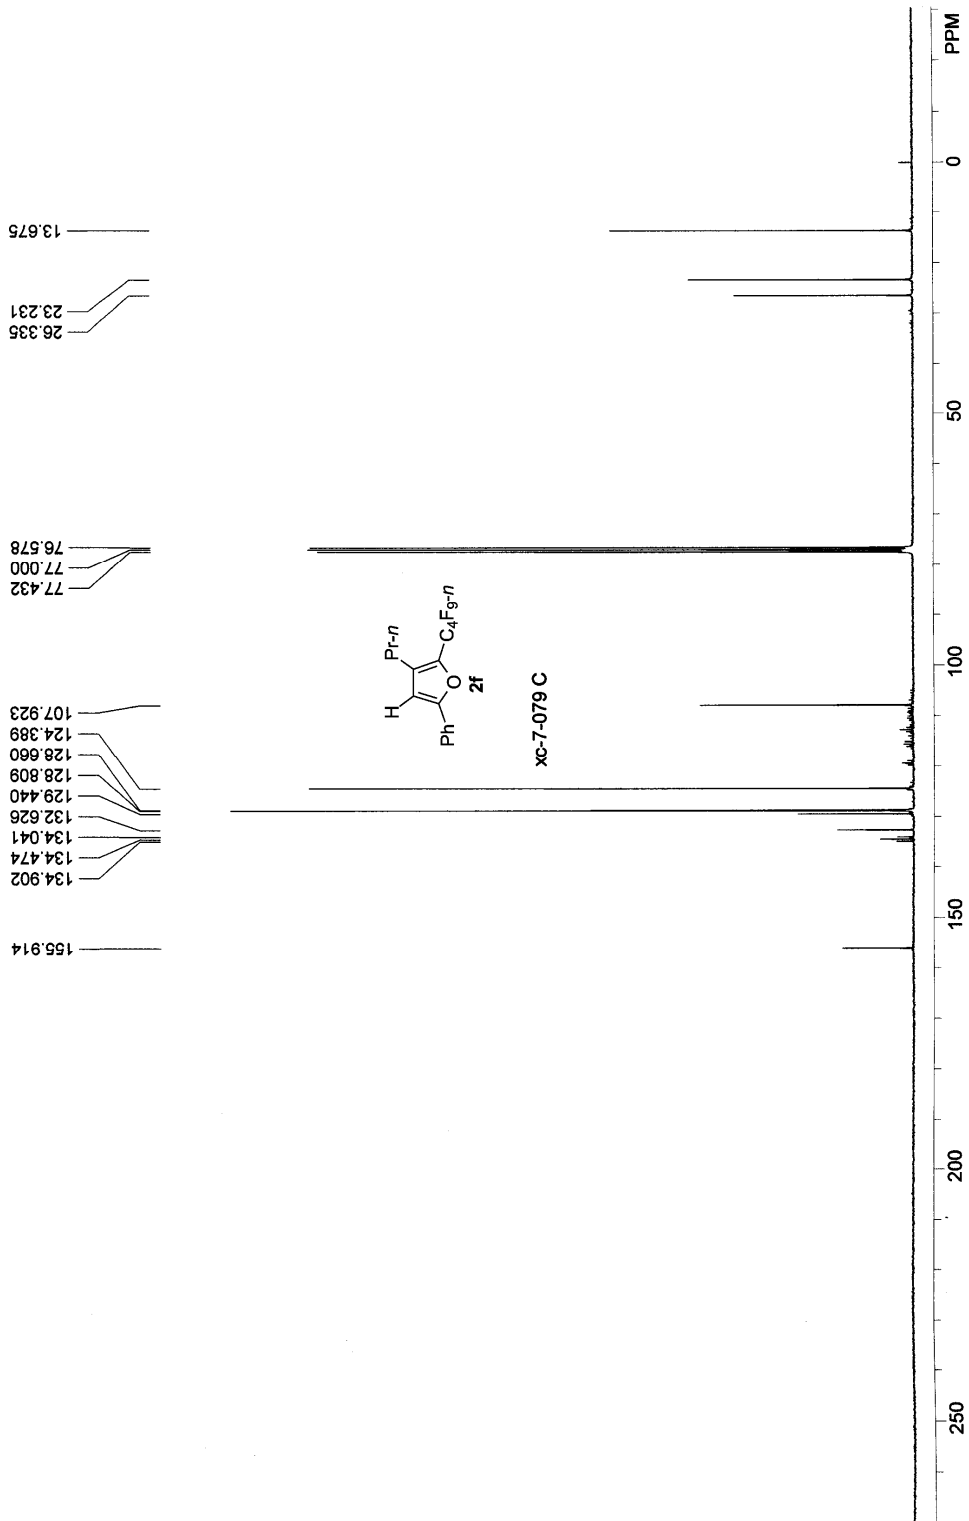

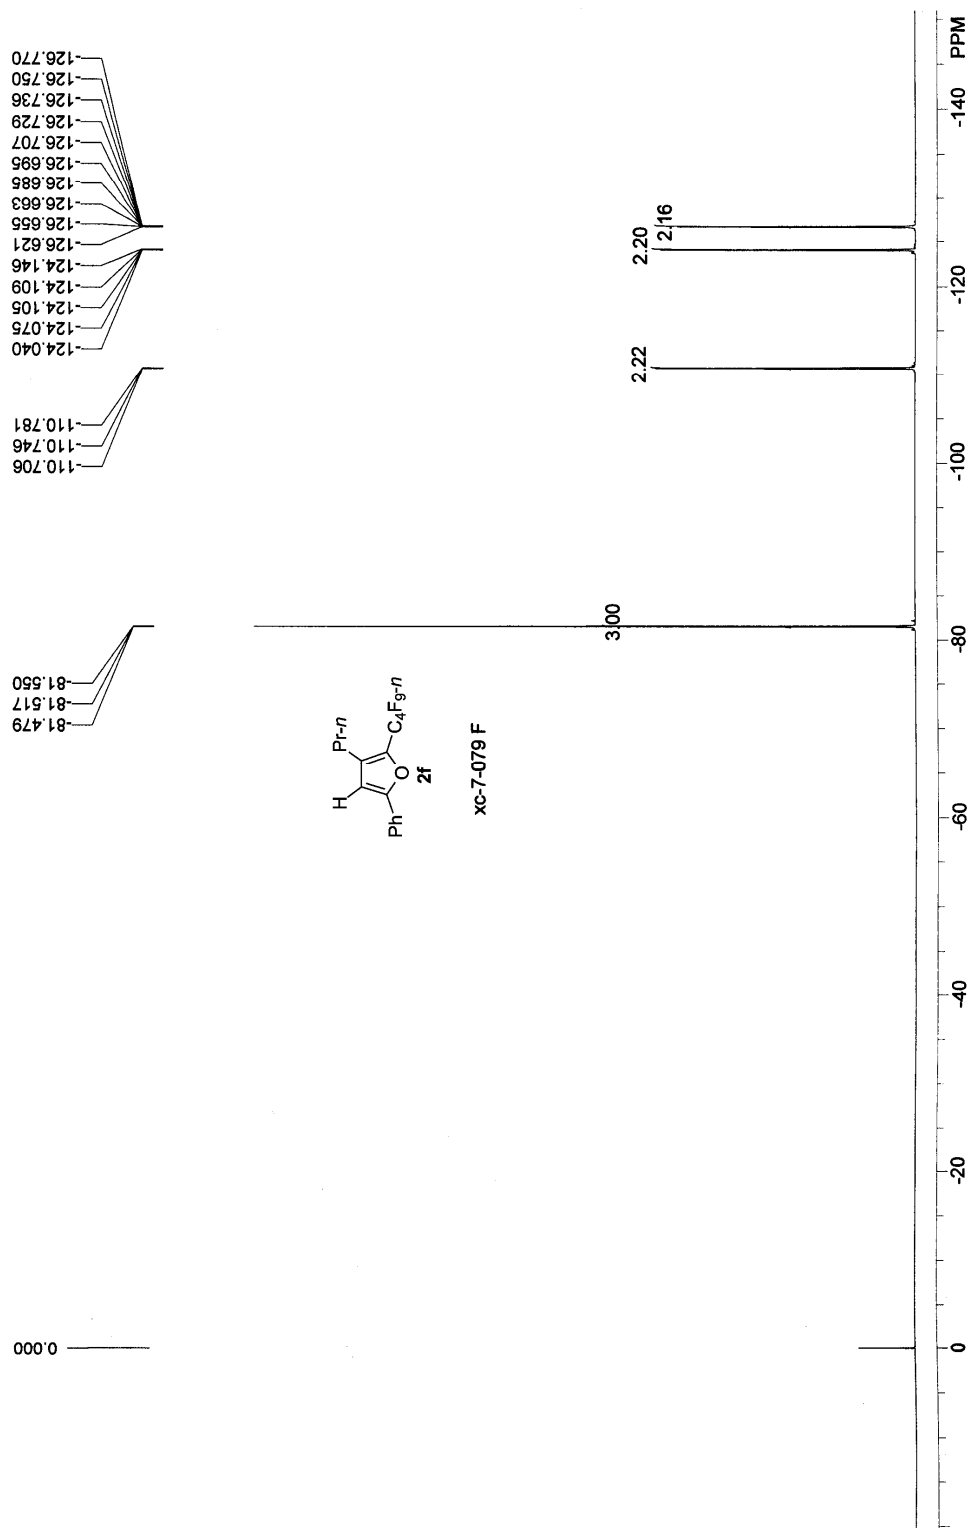

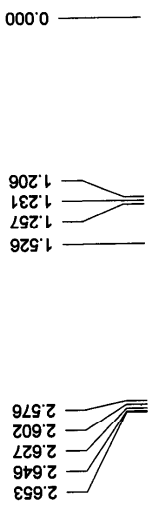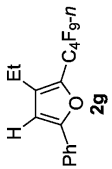

D:\nuts\new nuts\DATA\pdata  
 spect, CDCl3  
 Thu May 10 14:23:25 2012  
 USER: nmr  
 SOLVENT: nmr  
 Experiment = zg30  
 Pulse length = 14.000 usec  
 Recycle delay = 1.000 sec  
 NA = 8  
 PTS1d = 32768  
 F1 = 300.131866 MHz  
 F2 = 1.000000 MHz  
 SWH = 6188.12 Hz

xc-7-027

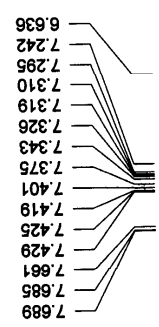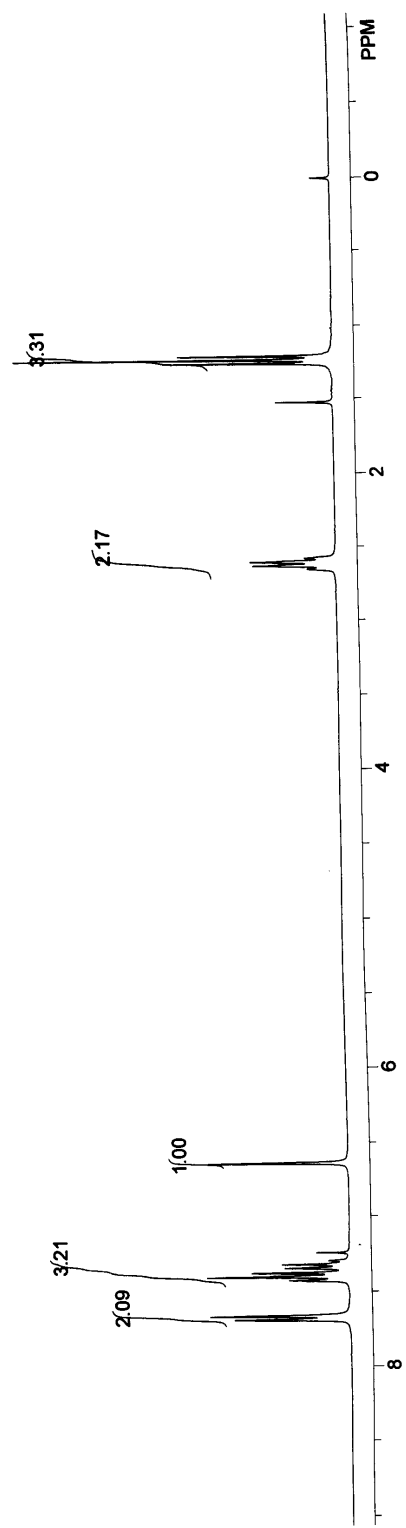

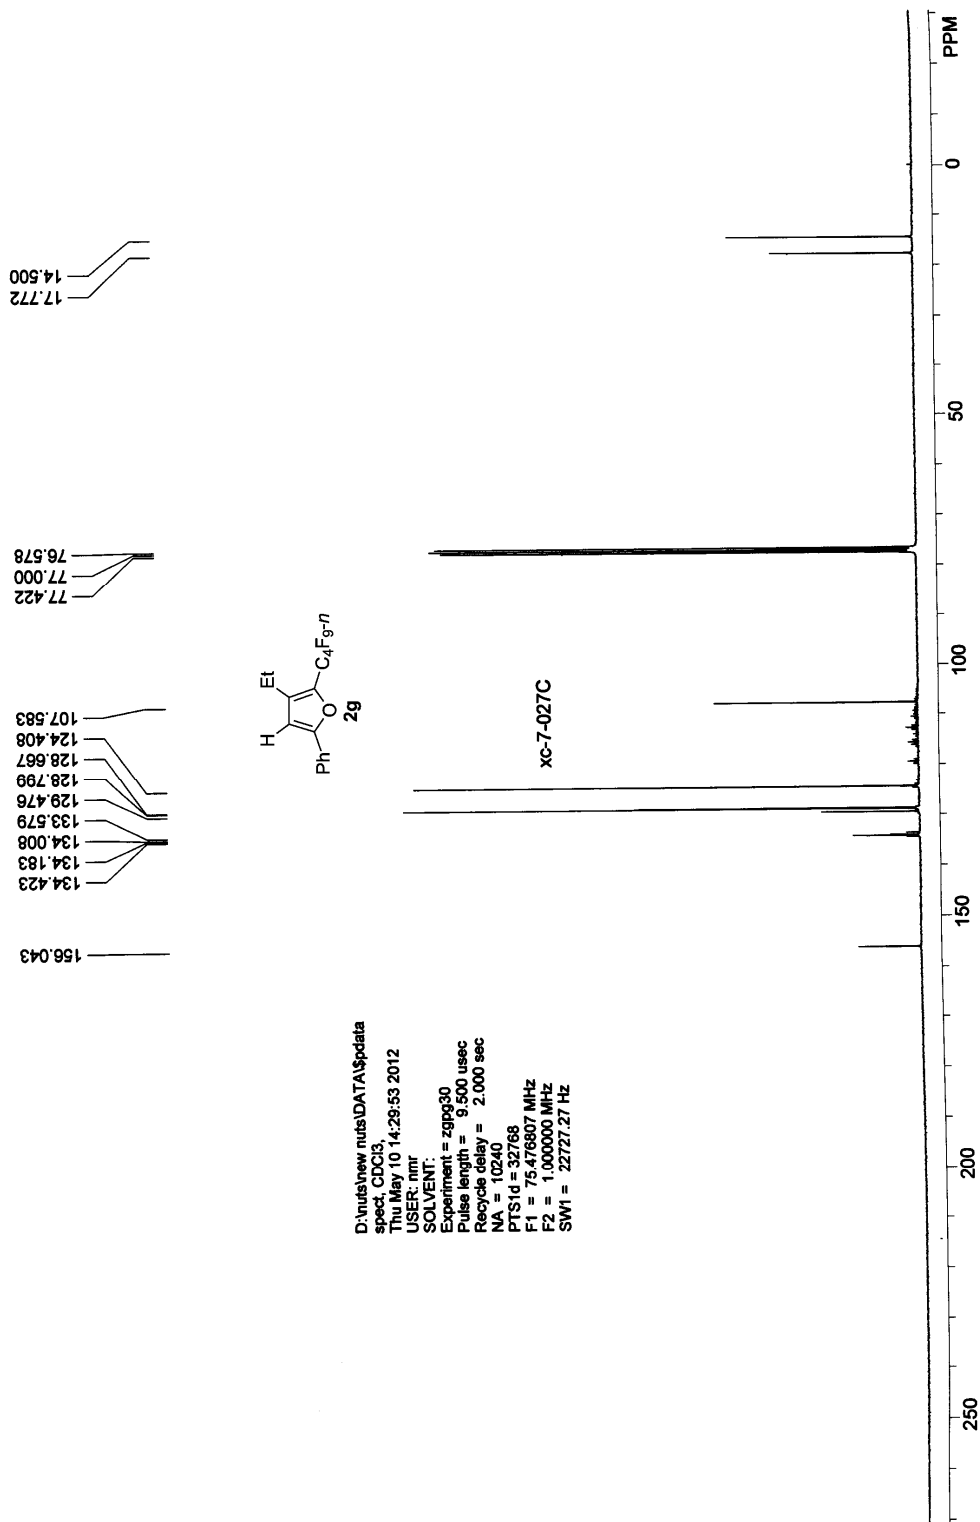

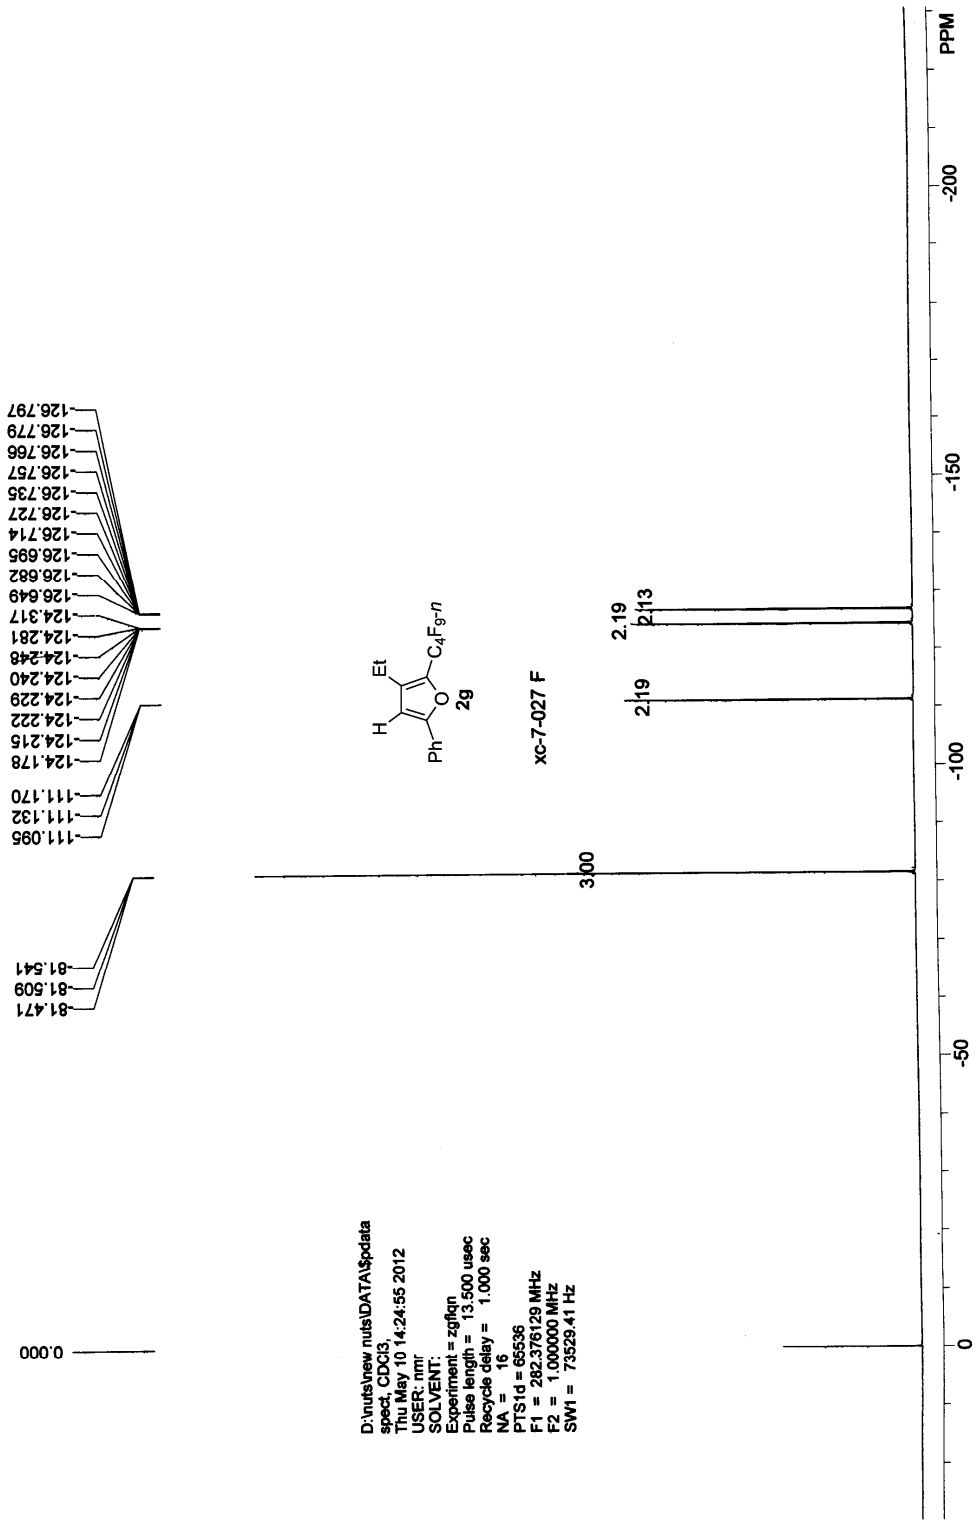



**PDF Complete**  
Your Special Edition complimentary use period has ended. Thank you for using PDF Complete.  
Click Here to upgrade to PDF Complete. Unlimited Pages and Expanded Features.

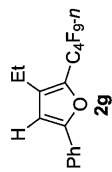

xc-7-027-noe

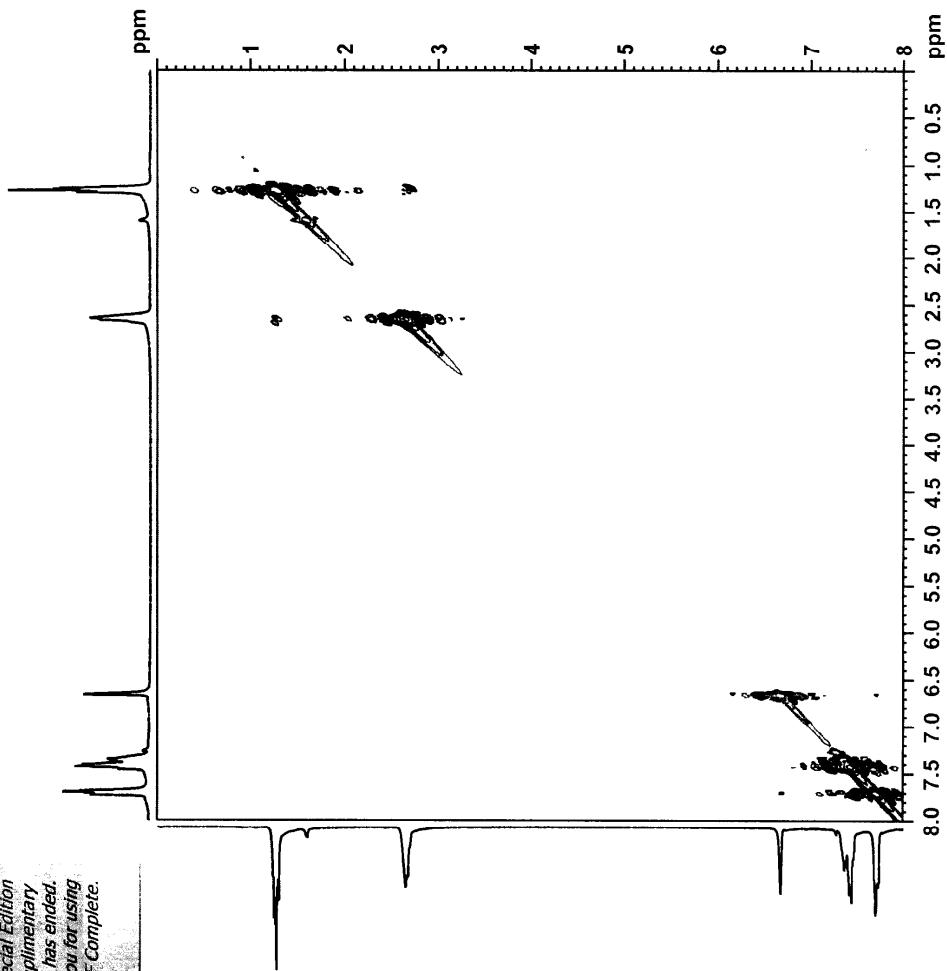

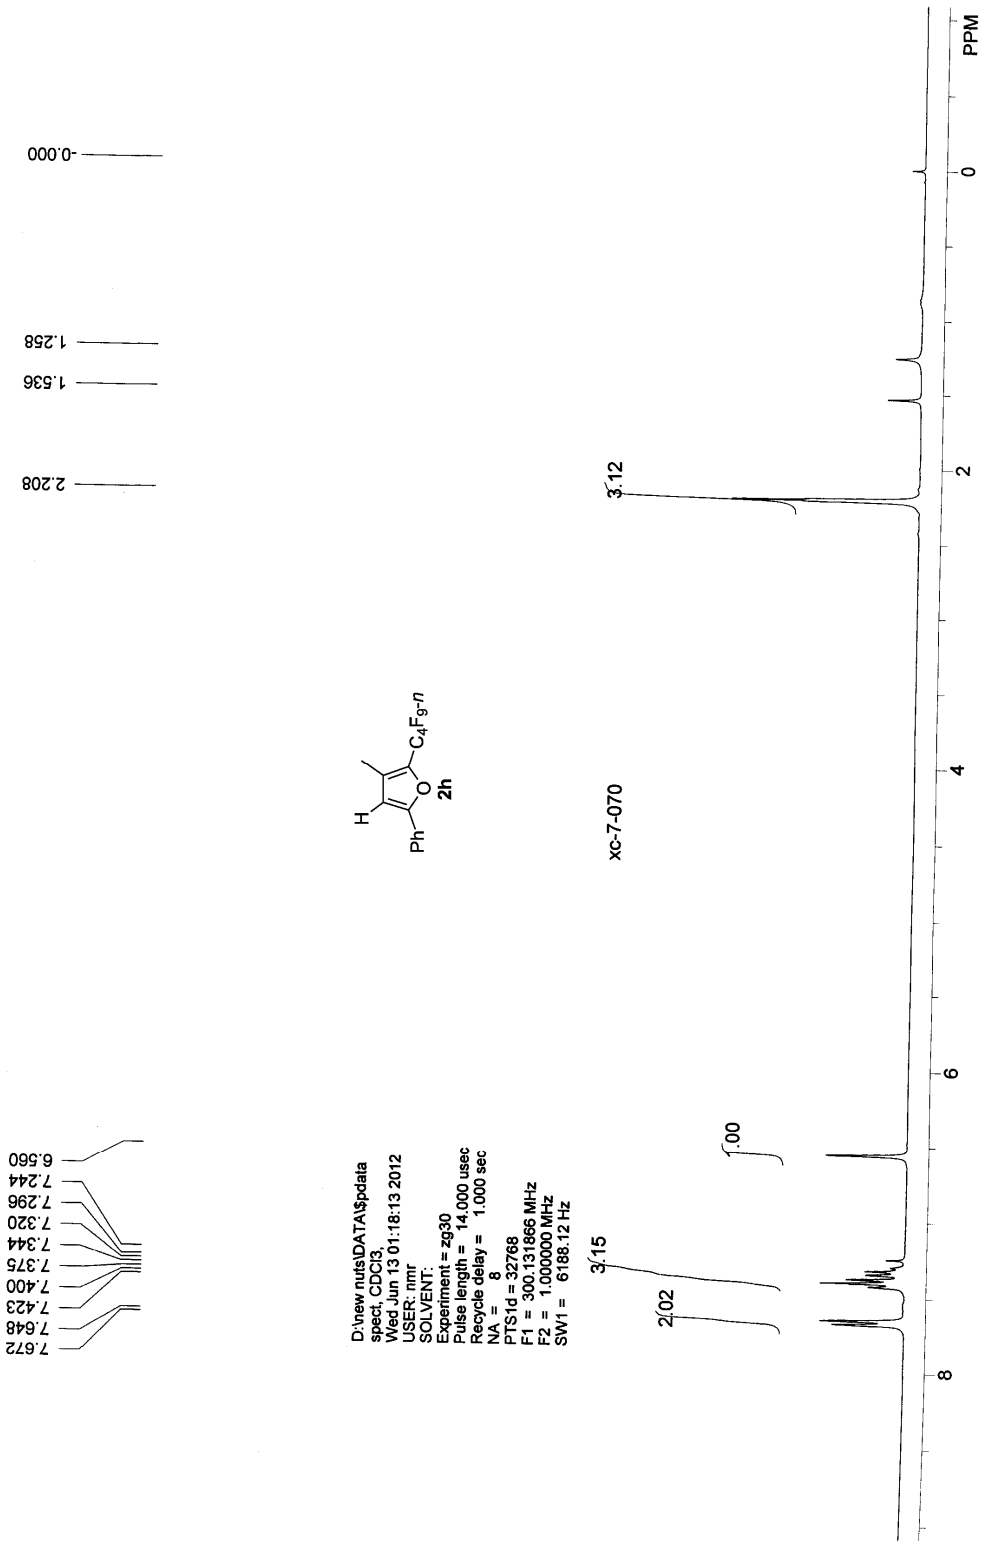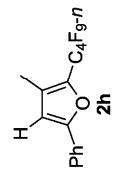

D:\new nut\data\spdata  
 spect, CDCI3,  
 Wed Jun 13 01:18:13 2012  
 USER: nmr  
 SOLVENT:  
 Experiment = zg30  
 Pulse length = 14.000 usec  
 Recycle delay = 1.000 sec  
 NA = 8  
 PTS1a = 32768  
 F1 = 300.131866 MHz  
 F2 = 1.000000 MHz  
 SW1 = 6188.12 Hz

D:\new\_rute\DATA\spdata  
 spec1, CDCI3,  
 Wed Jun 13 14:08:40 2012  
 USER: nmr  
 SOLVENT:  
 Experiment = zgpg30  
 Pulse length = 9.500 usec  
 Recycle delay = 2.000 sec  
 NA = 10240  
 P1 = 32768  
 F1 = 75.476807 MHz  
 F2 = 1.0000000 MHz  
 SW1 = 22727.27 Hz

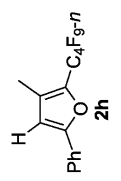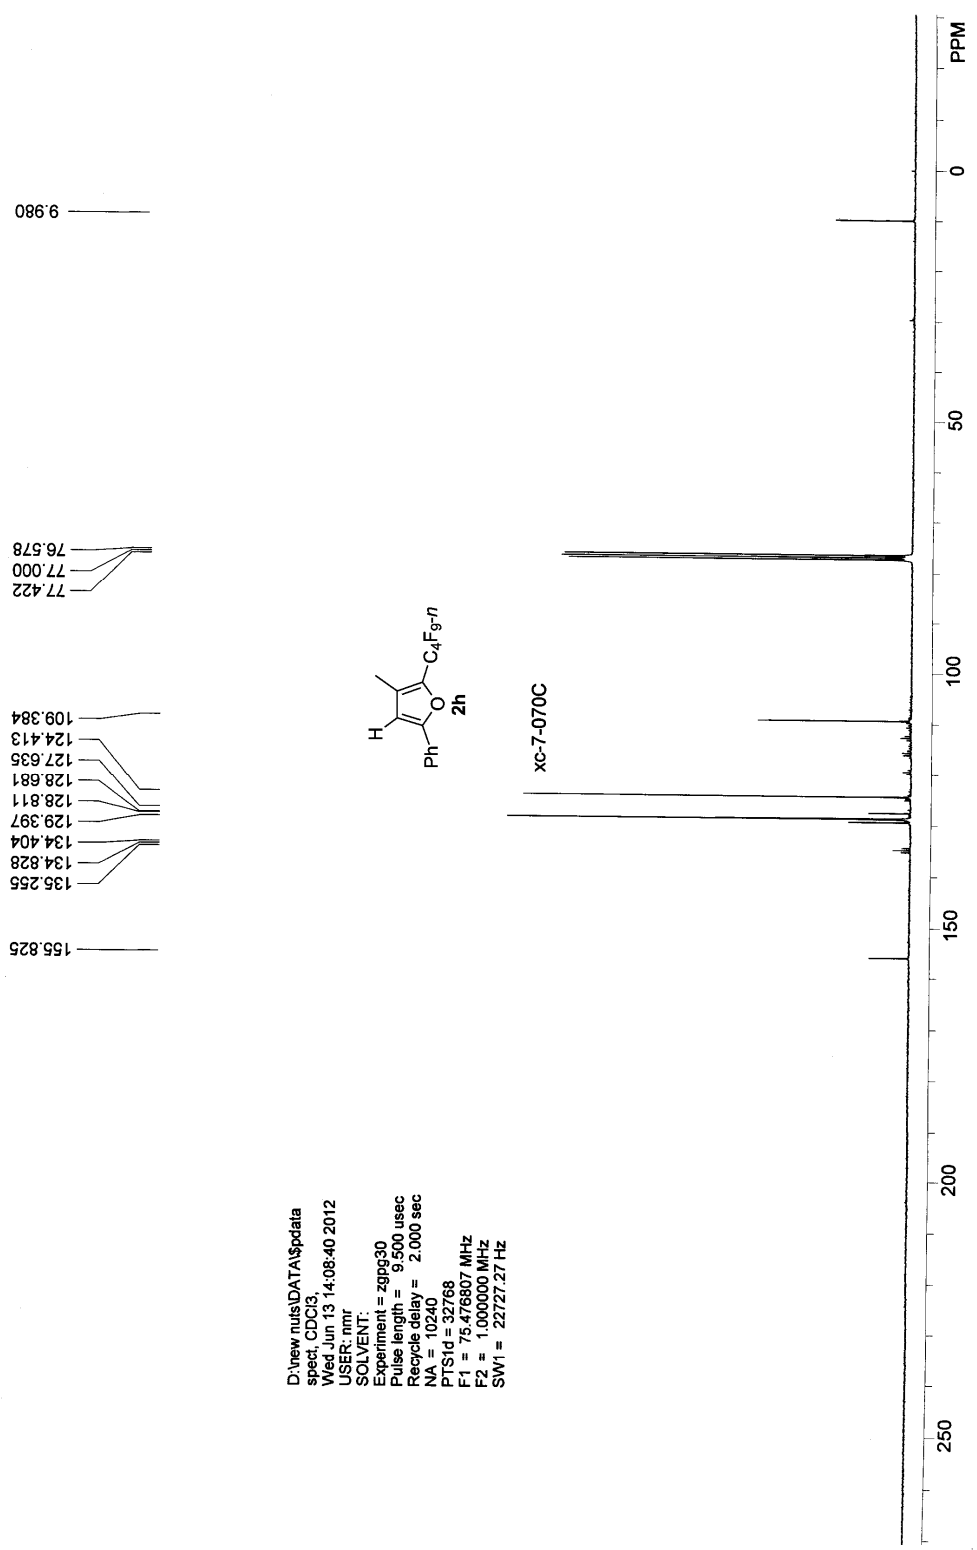

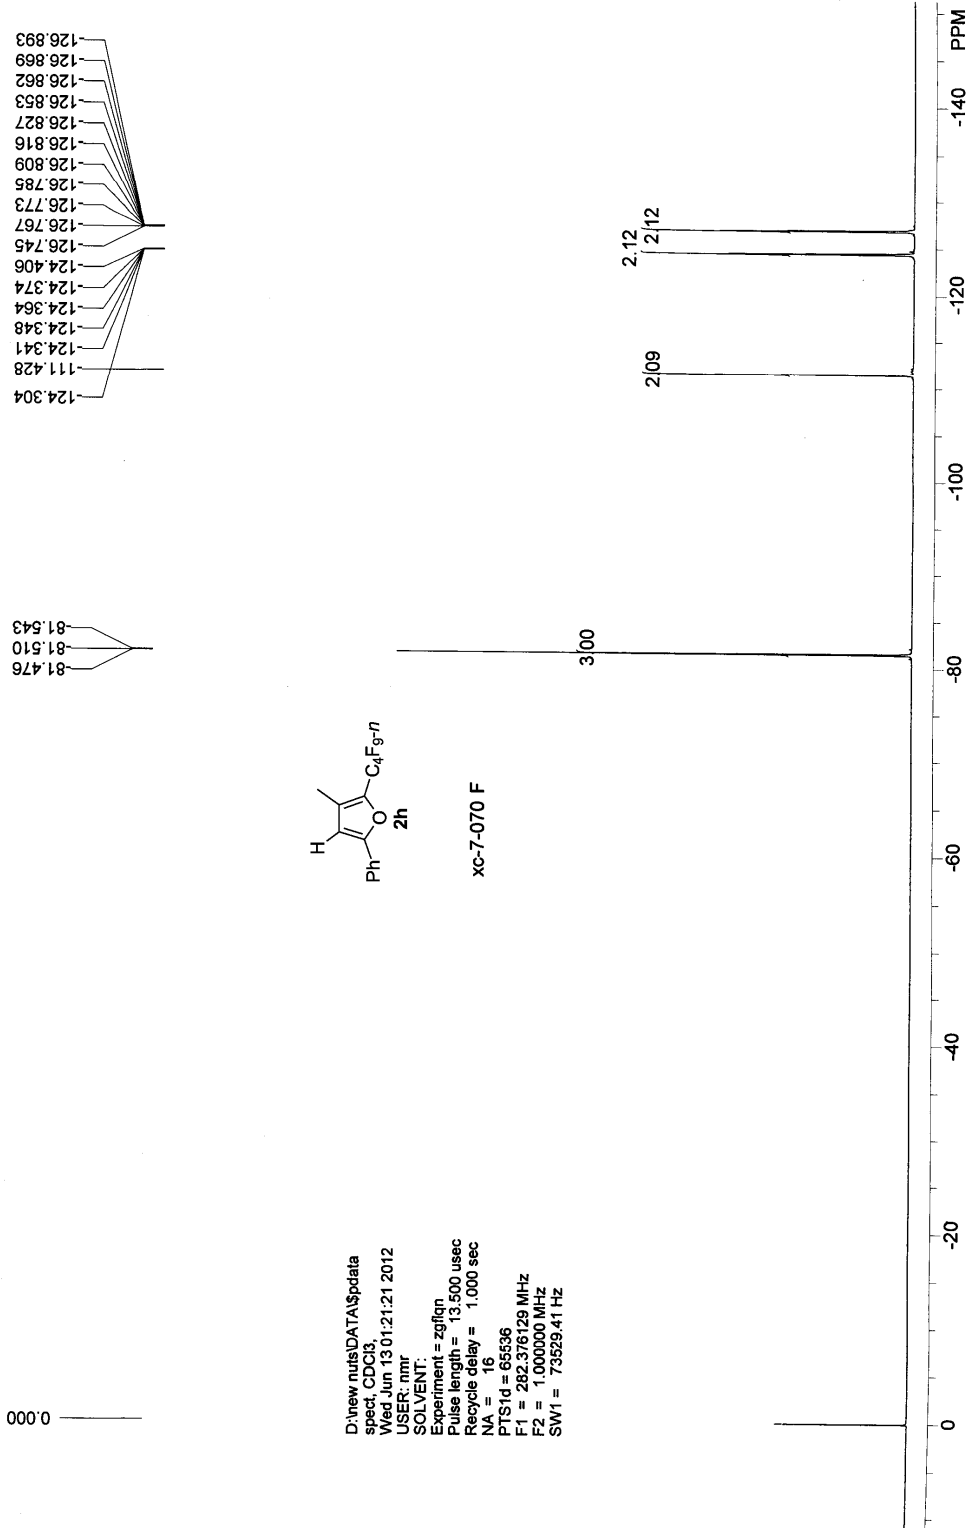

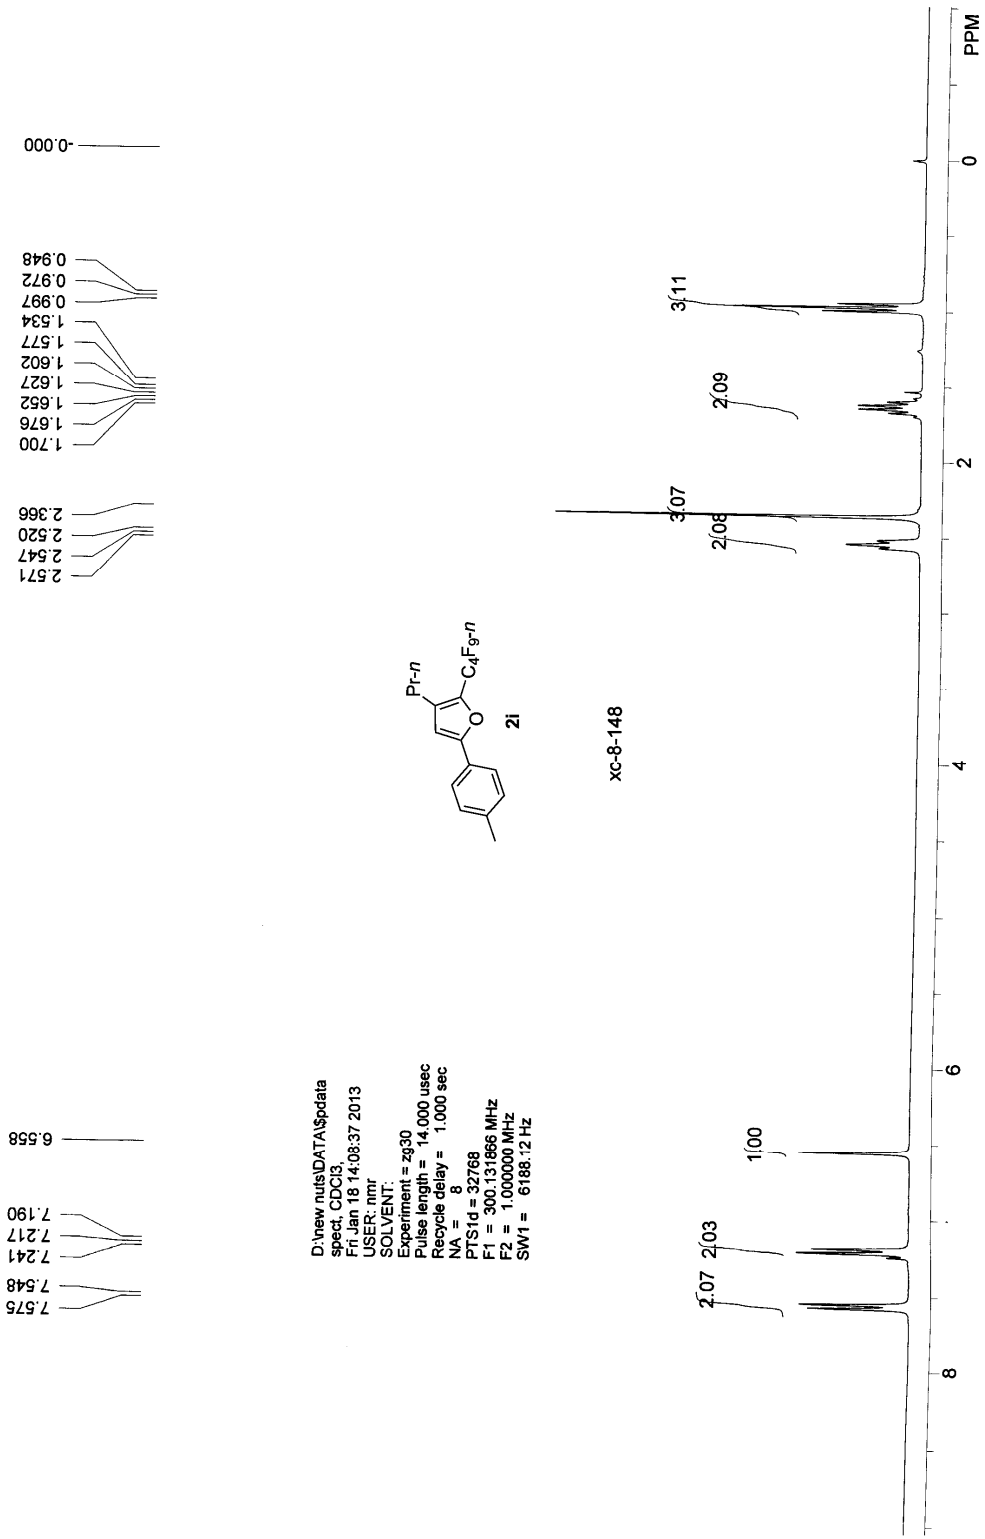

D:\new nuts\DATA\spdata  
 spect, CDCl3,  
 Fri Jan 18 14:08:37 2013  
 USER: nmr  
 SOLVENT:  
 Experiment = z930  
 Pulse length = 14,000 usec  
 Recycle delay = 1,000 sec  
 NA = 8  
 P1 = 32768  
 F1 = 300.131866 MHz  
 F2 = 1,000,000 MHz  
 SW1 = 6188.12 Hz

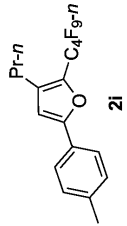

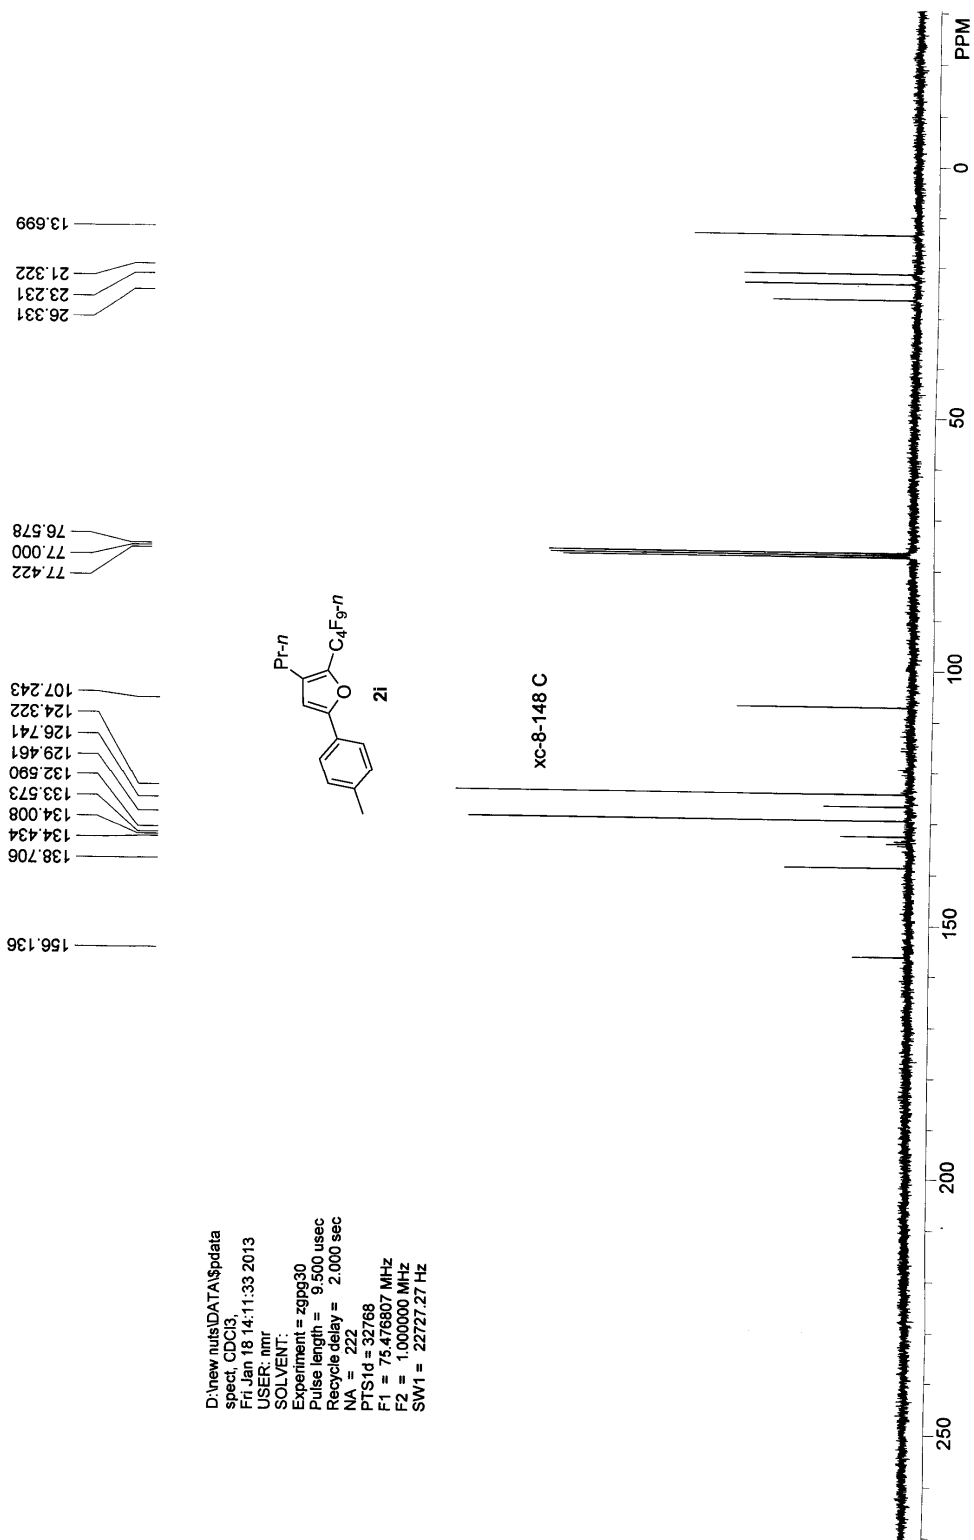

D:\new\_nuisDATA\spdata  
 spect, CDCI8,  
 Fri Jan 18 14:11:33 2013  
 USER: nmr  
 SOLVENT:  
 Experiment = zgpg30  
 Pulse length = 9.500 usec  
 Recycle delay = 2.000 sec  
 NA = 222  
 P1 = 32768  
 F1 = 75.476807 MHz  
 F2 = 1.000000 MHz  
 SW1 = 22727.27 Hz

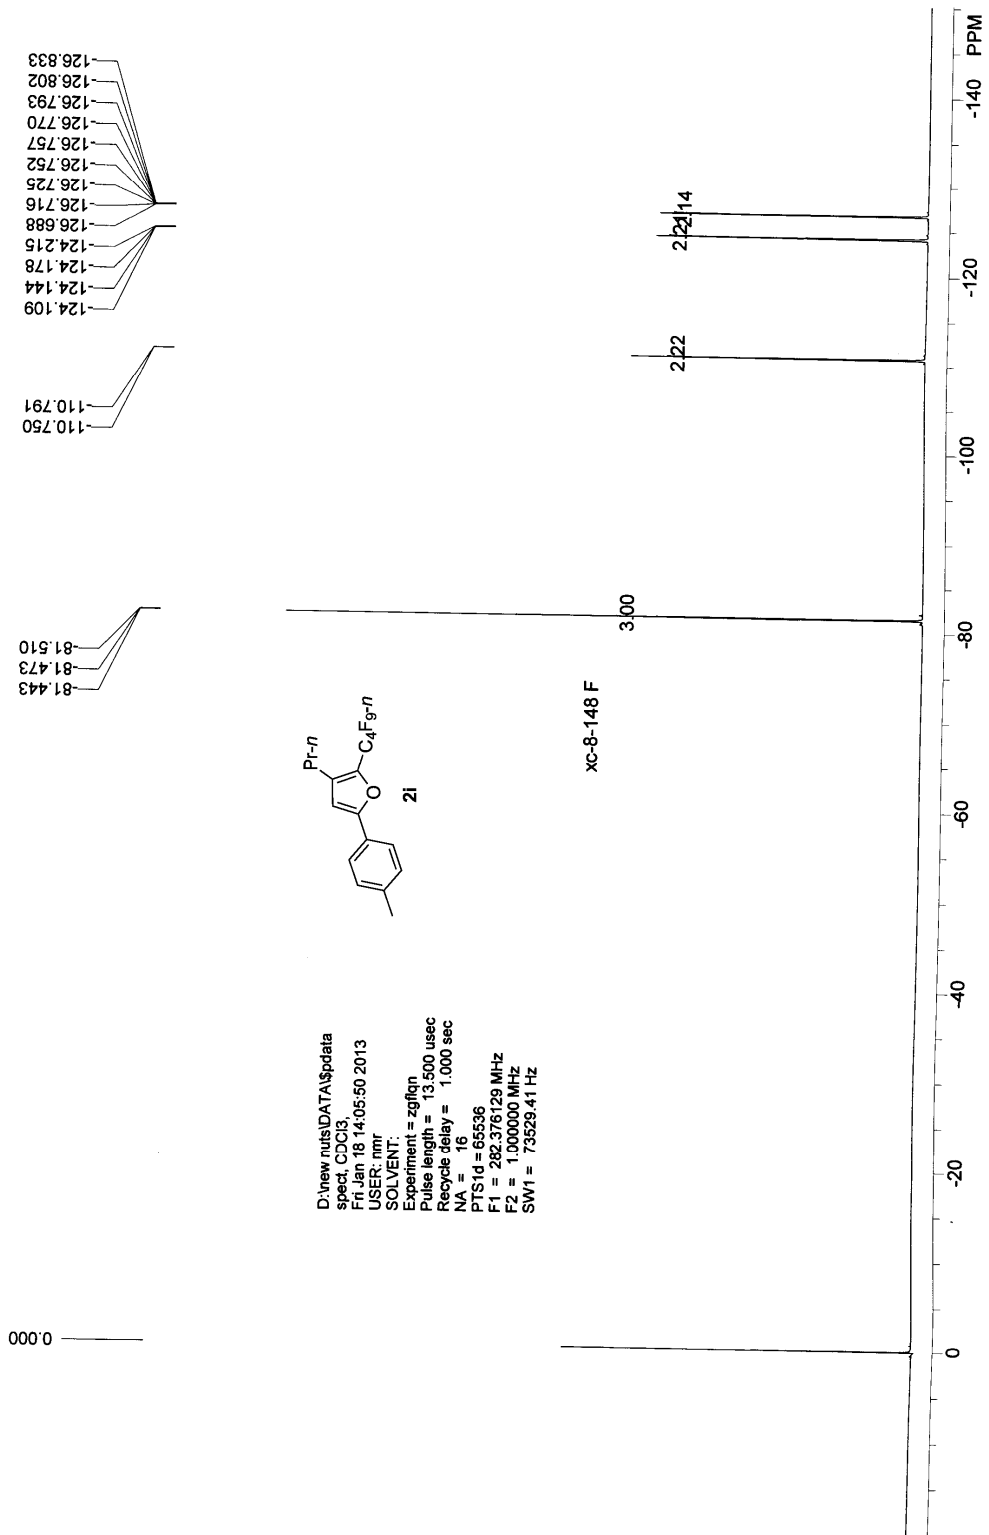

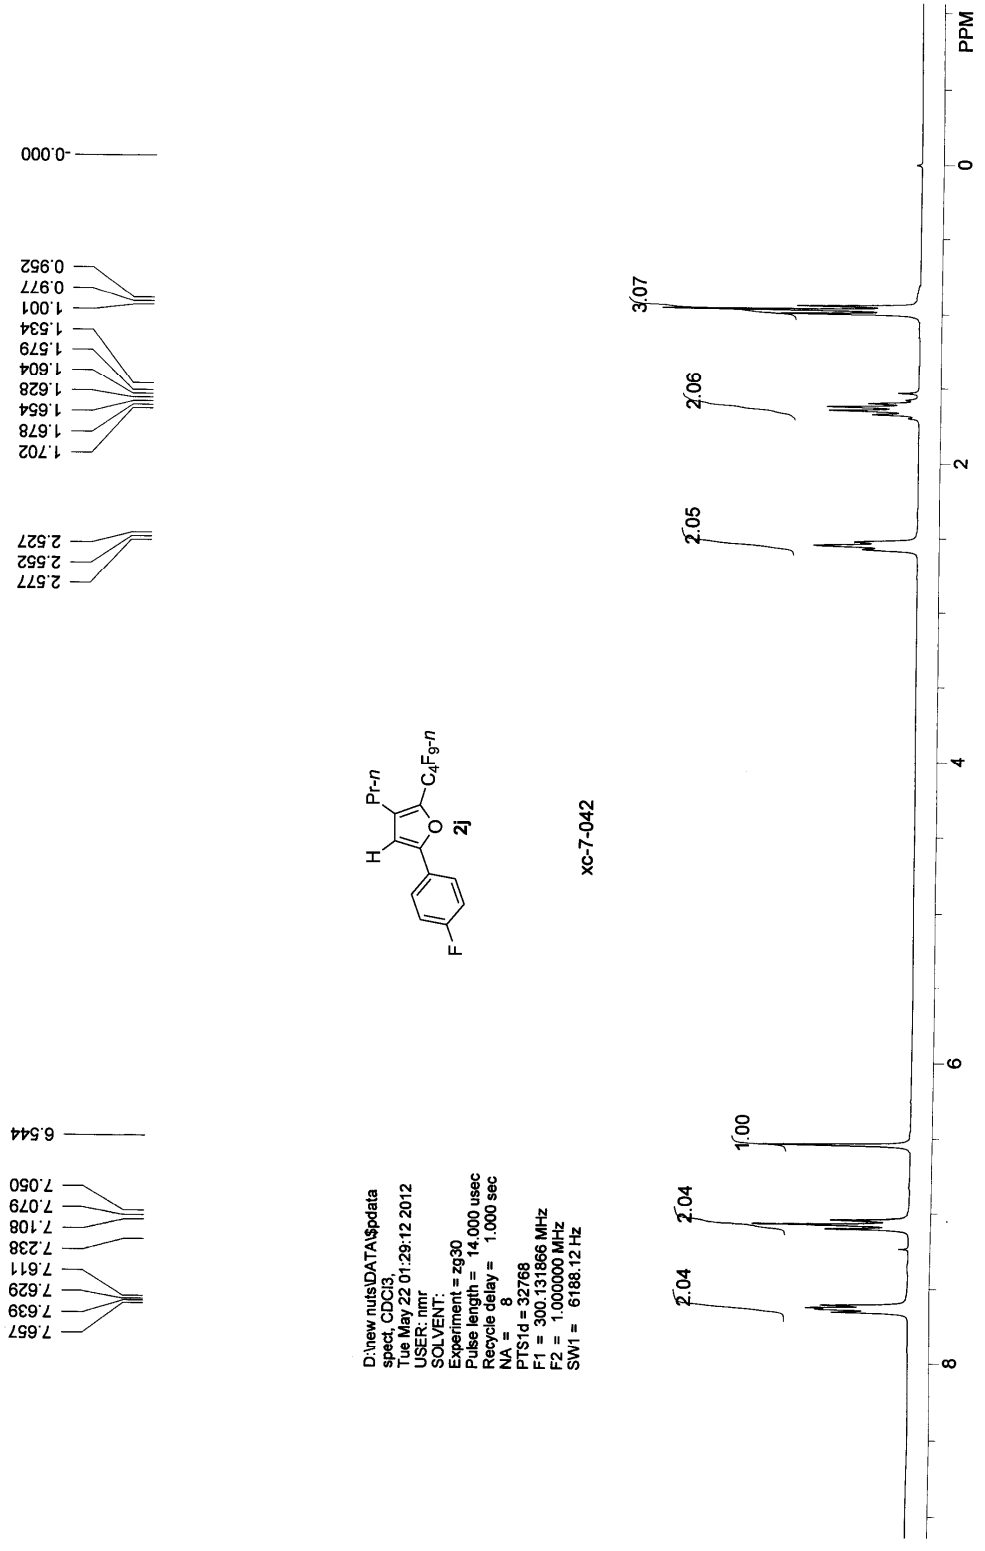

D:\new nuisDATA\pdata  
 spect\_CDCl3  
 Tue May 22 01:29:12 2012  
 USER: mmr  
 SOLVENT:  
 Experiment = zg30  
 Pulse length = 14,000 usec  
 Recycle delay = 1,000 sec  
 NA = 8  
 P1 = 32768  
 P1S1d = 32768  
 F1 = 300,131866 MHz  
 F2 = 1,000000 MHz  
 SW1 = 6188.12 Hz

xc-7-042



D:\new nuts\DATA\Spdata  
 spect, CDCIS,  
 Tue May 22 09:04:55 2012  
 USER: nmr  
 SOLVENT: nmr  
 Experiment = z9pg30  
 Pulse length = 9.500 usec  
 Recycle delay = 2.000 sec  
 NA = 2441  
 PTS1d = 32768  
 F1 = 75.476807 MHz  
 F2 = 1.000000 MHz  
 SW1 = 22727.27 Hz

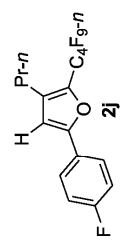

xc-7-042C

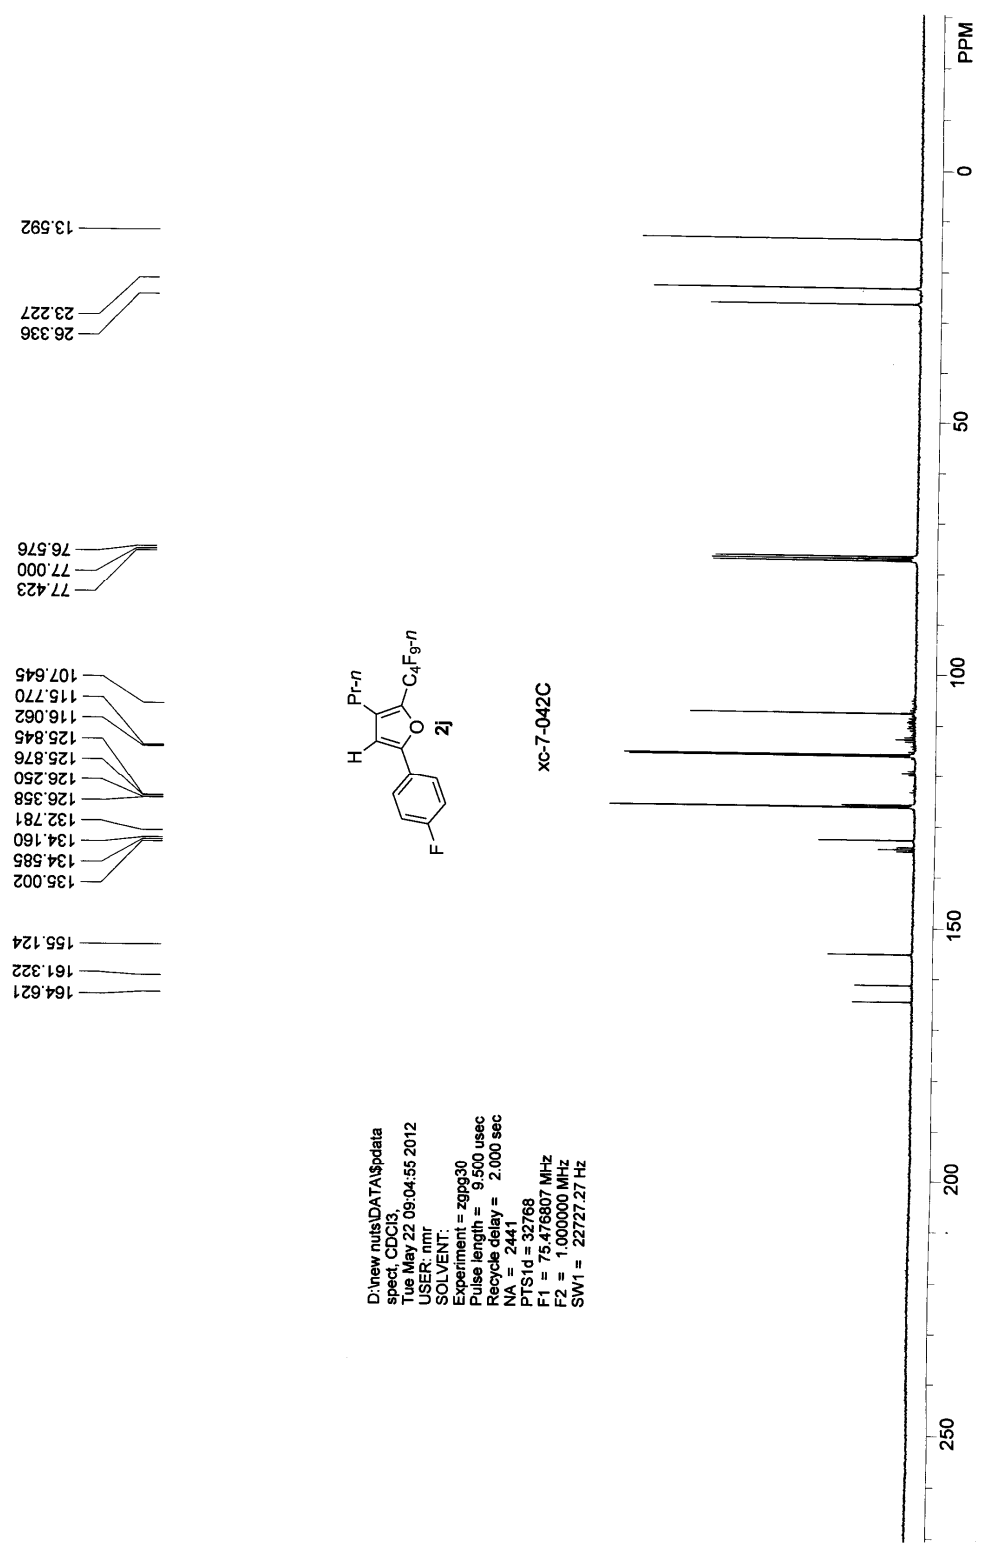

0.000

D:\newnuts\DATA\spdata  
spect, CDCI3,  
Tue May 22 01:32:20 2012  
USER: nmr  
SOLVENT:  
Experiment = zgpgn  
Pulse length = 13.500 usec  
Recycle delay = 1.000 sec  
NA = 16  
PTSD = 65536  
F1 = 282.376129 MHz  
F2 = 1,000,000 MHz  
SWH = 73529.41 Hz

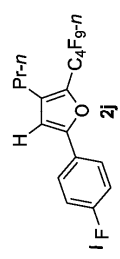

xc-7-042 F

81.506  
81.518  
81.524

110.769  
112.545  
112.555  
112.574

124.057  
124.092  
126.653  
126.694  
126.729

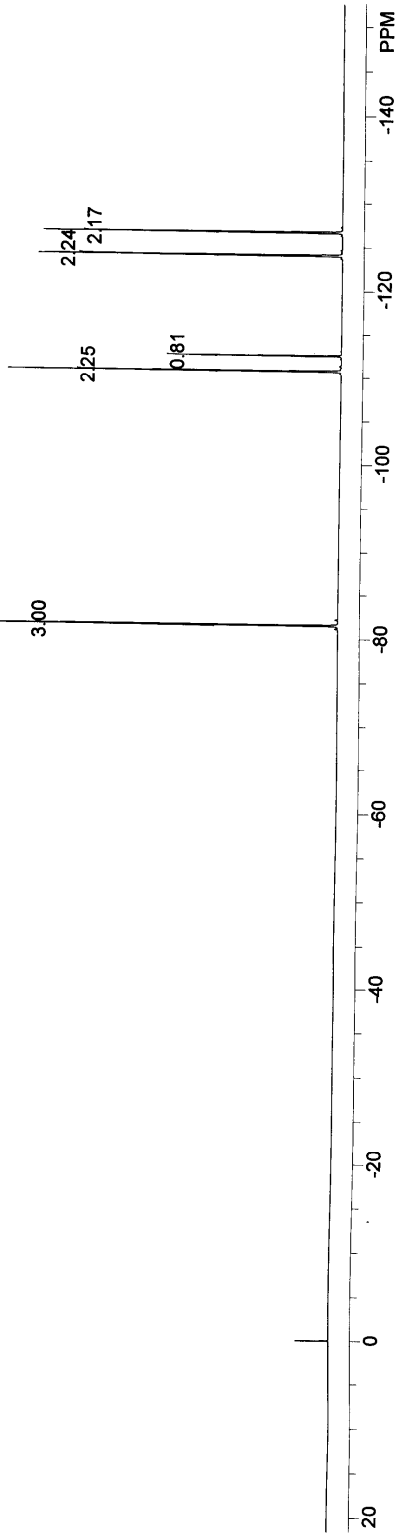

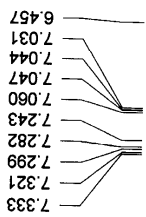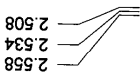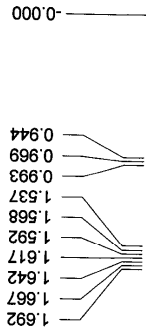

D:\new\nu1\data\spdata  
spect, CDCl3,  
Sat May 26 07:27:11 2012  
USER: nmr  
SOLVENT: nmr  
Experiment = zg30  
Pulse length = 14.000 usec  
Recycle delay = 1.000 sec  
NA = 8  
PTS1id = 32768  
F1 = 300.131866 MHz  
F2 = 1.000000 MHz  
SW1 = 6186.12 Hz

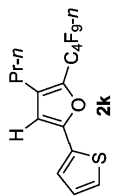

xc-7-049

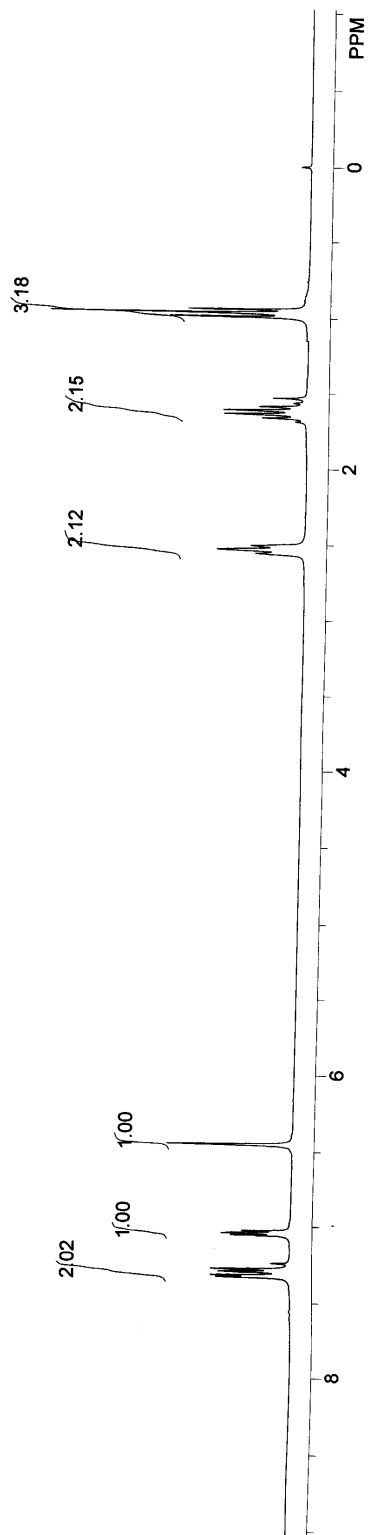

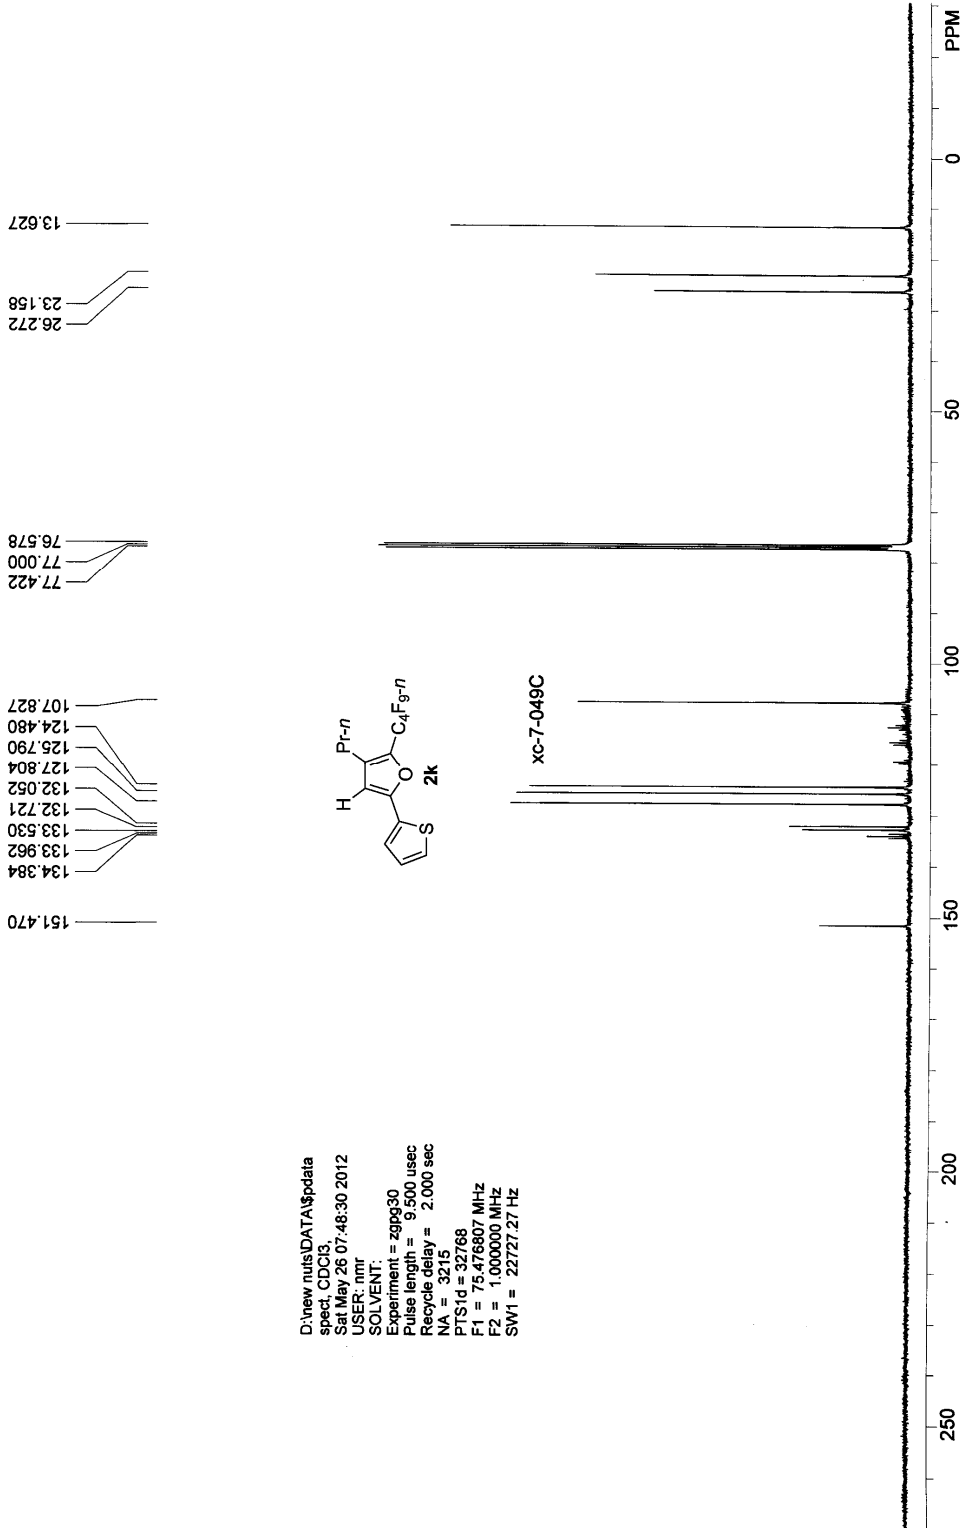

D:\new\_nuisDATA\pdata  
 spect\_CDCl3  
 Sat May 26 07:48:30 2012  
 USER: nmr  
 SOLVENT:  
 Experiment = zgpg30  
 Pulse length = 9.500 usec  
 Recycle delay = 2.000 sec  
 NA = 3215  
 P1 = 32768  
 F1 = 75.476807 MHz  
 F2 = 1.000000 MHz  
 SW1 = 22727.27 Hz

-0.000

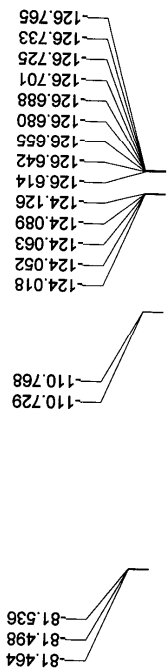

81.464  
81.498  
81.536

110.729  
110.768

124.018  
124.052  
124.063  
124.089  
124.126  
126.614  
126.642  
126.655  
126.680  
126.688  
126.701  
126.725  
126.733  
126.765

D:\new\nuistDATA\spdata  
spect\_CDCl3  
Sat May 26 07:30:29 2012  
USER: nmr  
SOLVENT:  
Experiment = zgfgn  
Pulse length = 13.500 usec  
Recycle delay = 1.000 sec  
NA = 16  
PTS1d = 65536  
F1 = 282.376129 MHz  
F2 = 1.000000 MHz  
SW1 = 73529.41 Hz

XC-7-049 F

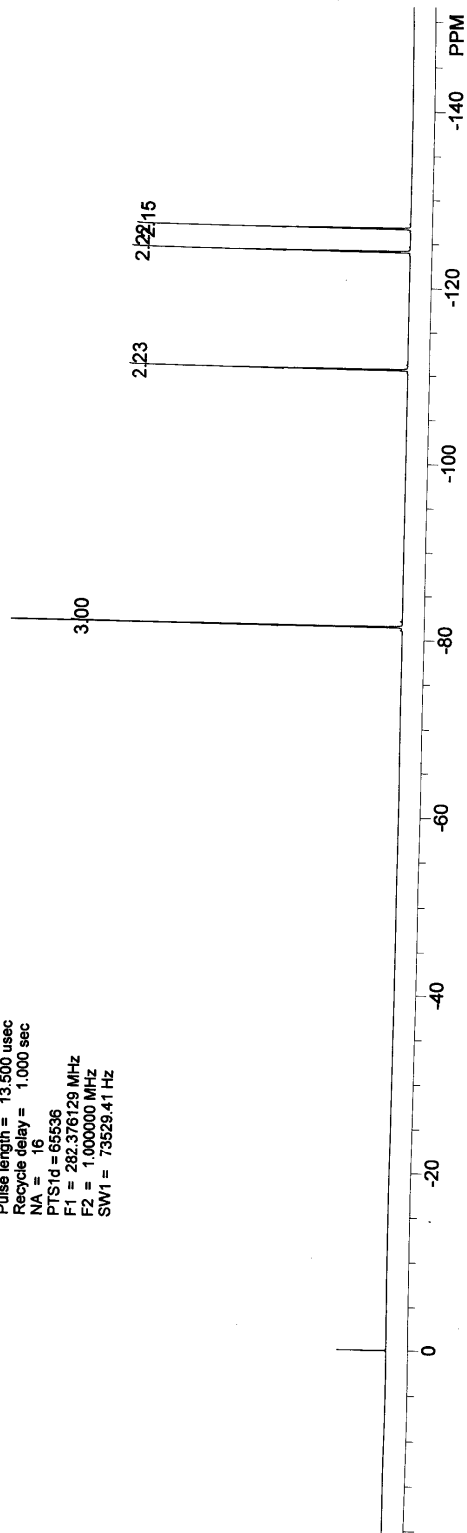


**PDF Complete**  
 Your Special Edition complimentary use period has ended. Thank you for using PDF Complete.  
 Click Here to upgrade to Unlimited Pages and Expansion.

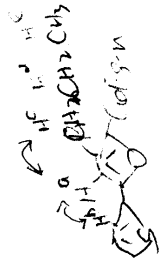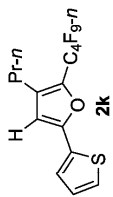

xc-7-049-noe

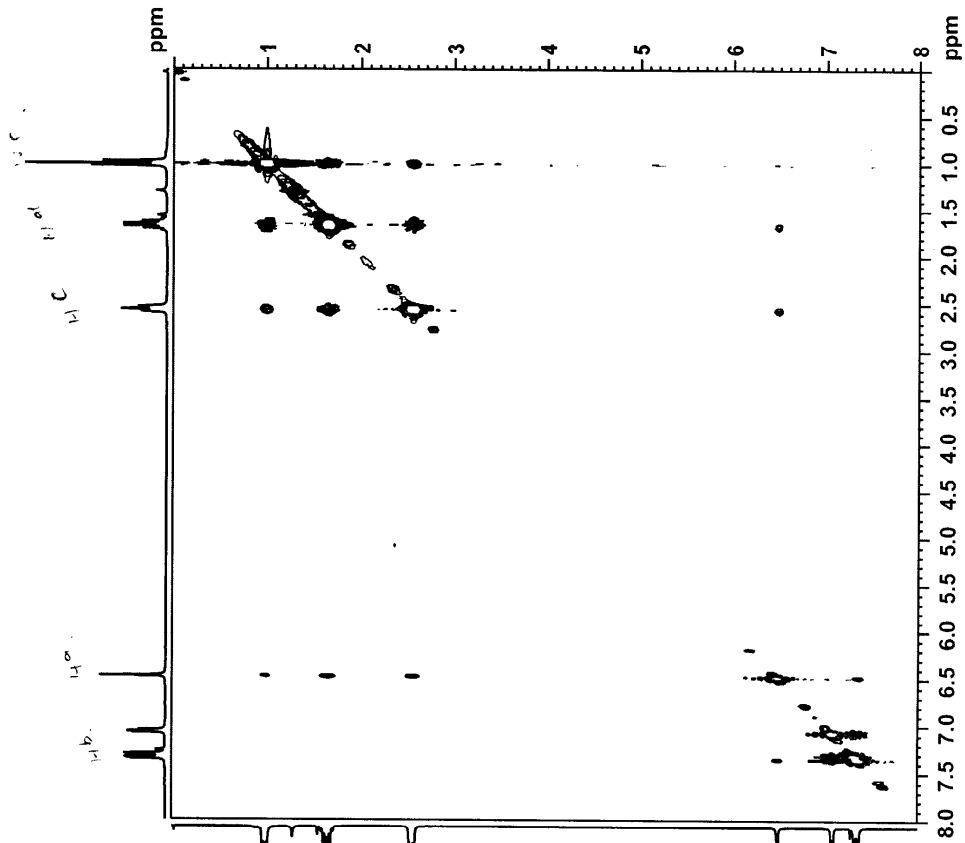

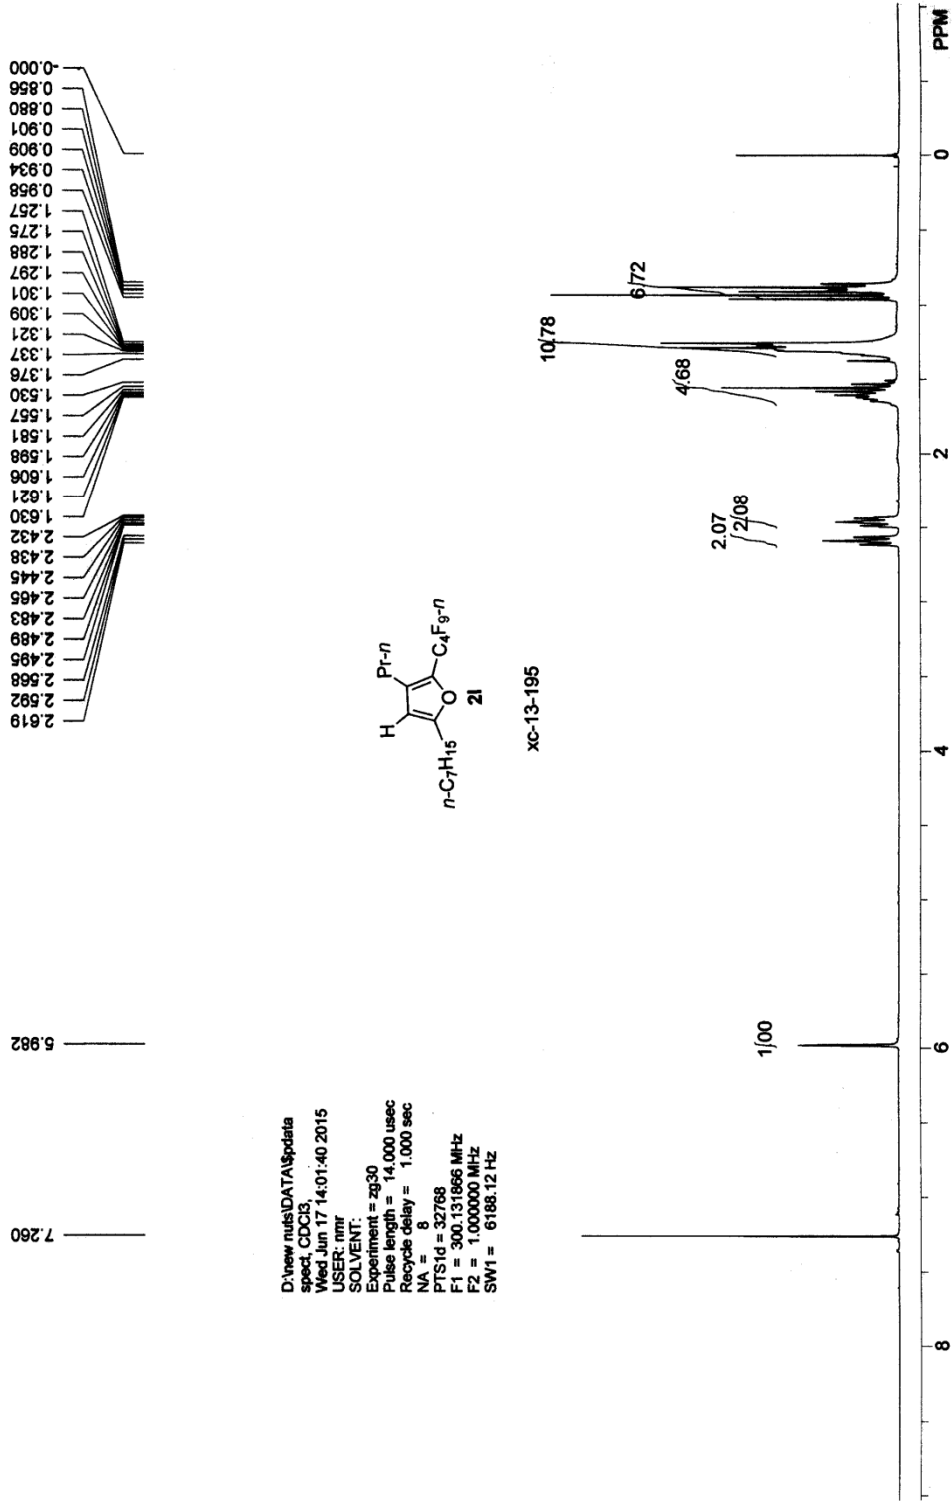

D:\new nuSIDATA\pdata  
 spect CDCl3  
 Wed Jun 17 14:01:40 2015  
 USER: nmr  
 SOLVENT:  
 Experiment = zg30  
 Pulse length = 14.000 usec  
 Recycle delay = 1.000 sec  
 NA = 8  
 PTS1d = 32768  
 F1 = 300.131866 MHz  
 F2 = 1.000000 MHz  
 SW1 = 6188.12 Hz

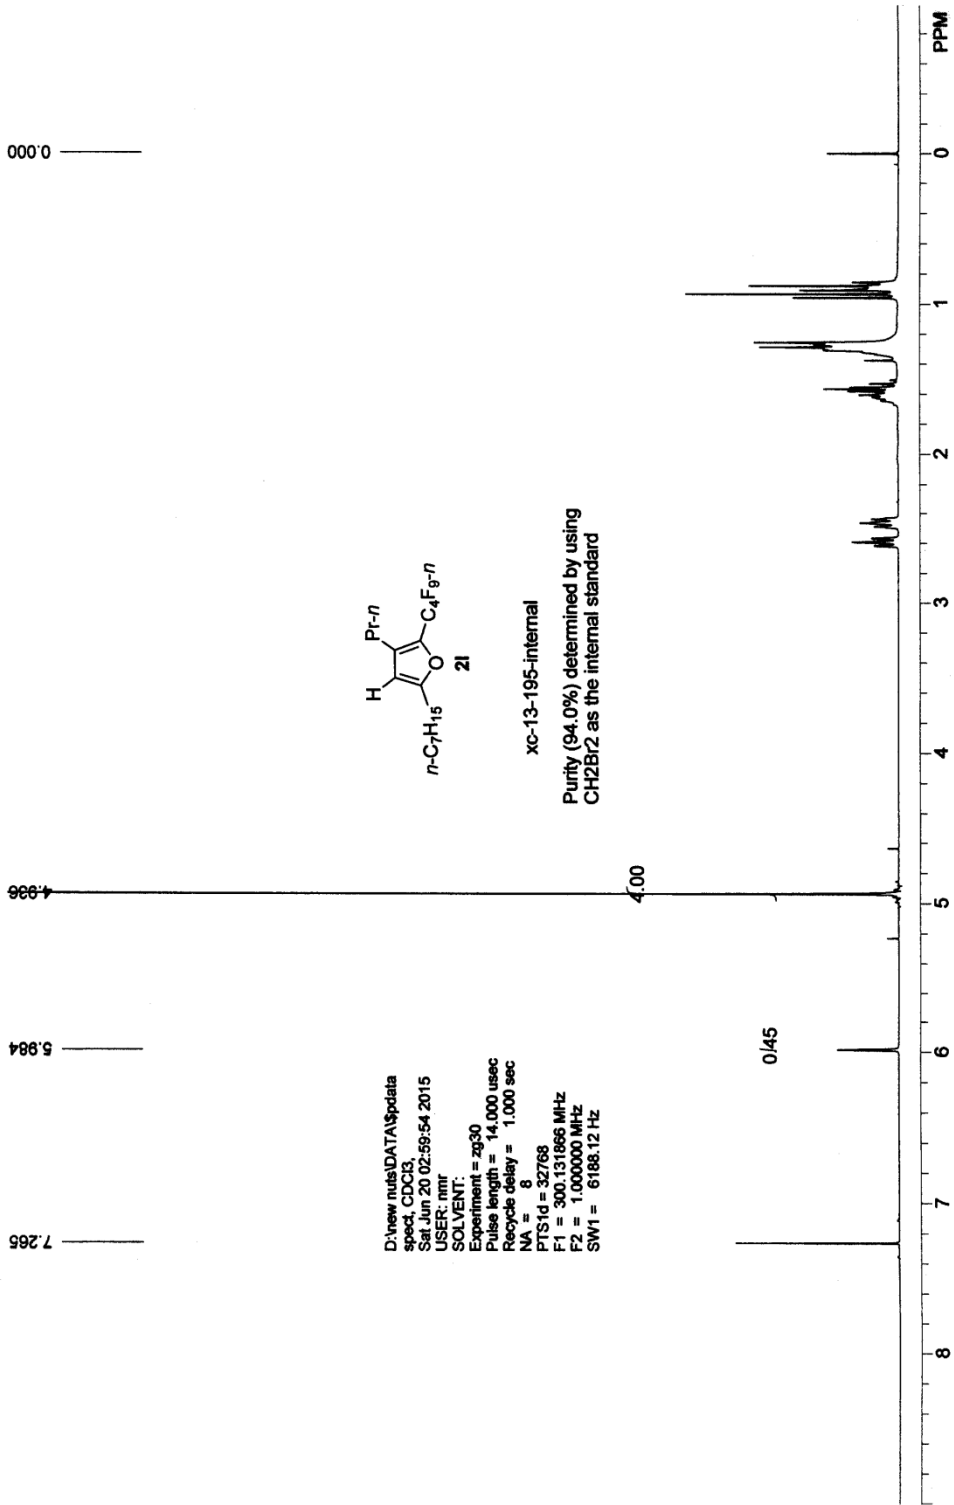



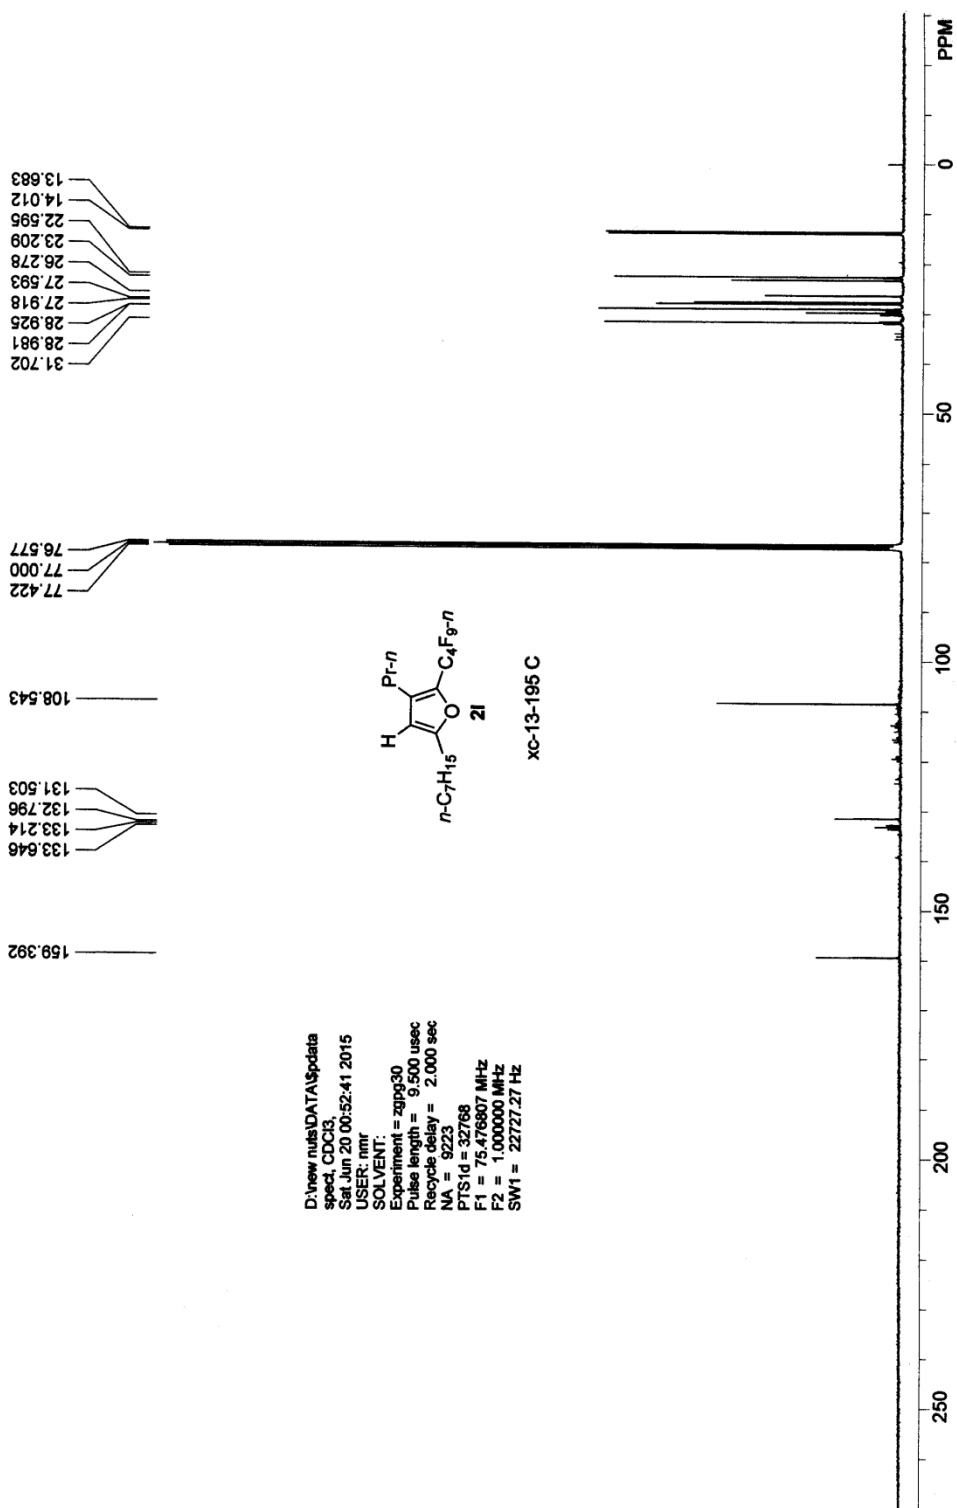

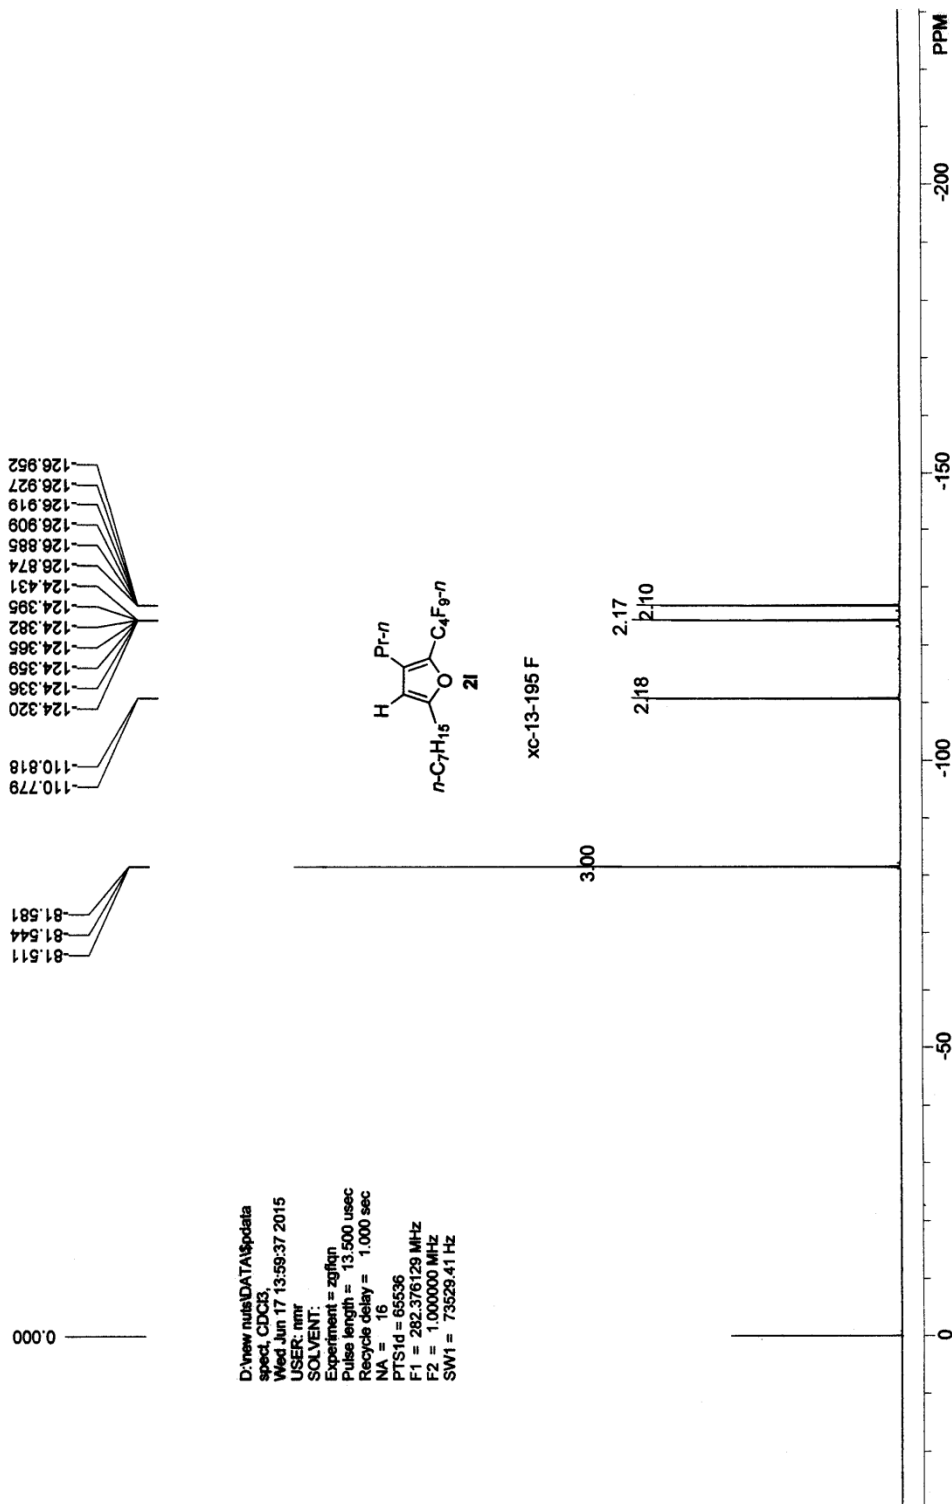

D:\new nuis\DATA\spdata  
 spect, CDCCl3,  
 Wed Jun 17 13:59:37 2015  
 USER: nmr  
 SOLVENT:  
 Experiment = zgpg30  
 Pulse length = 13.500 usec  
 Recycle delay = 1.000 sec  
 NA = 16  
 P1 = 65536  
 F1 = 282.376129 MHz  
 F2 = 1.000000 MHz  
 SWH = 73529.41 Hz

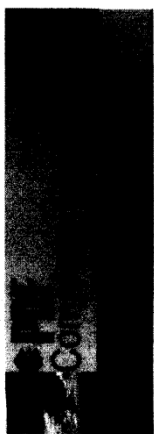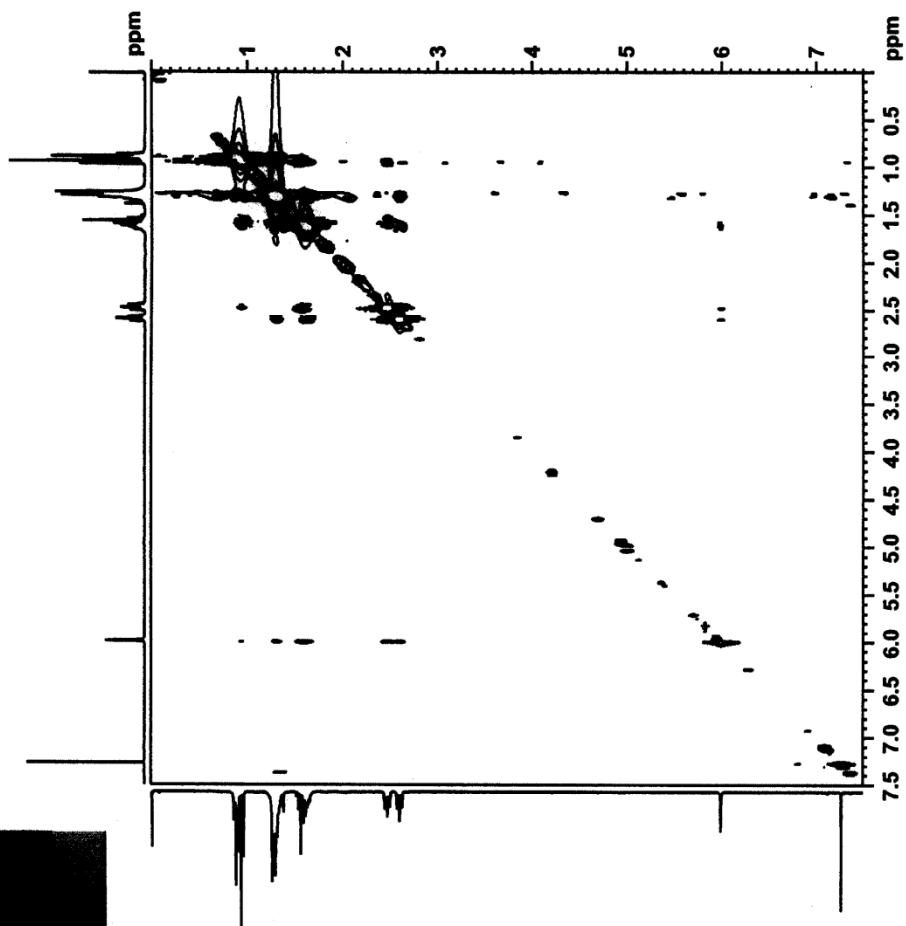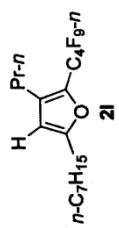

xc-13-195-noe

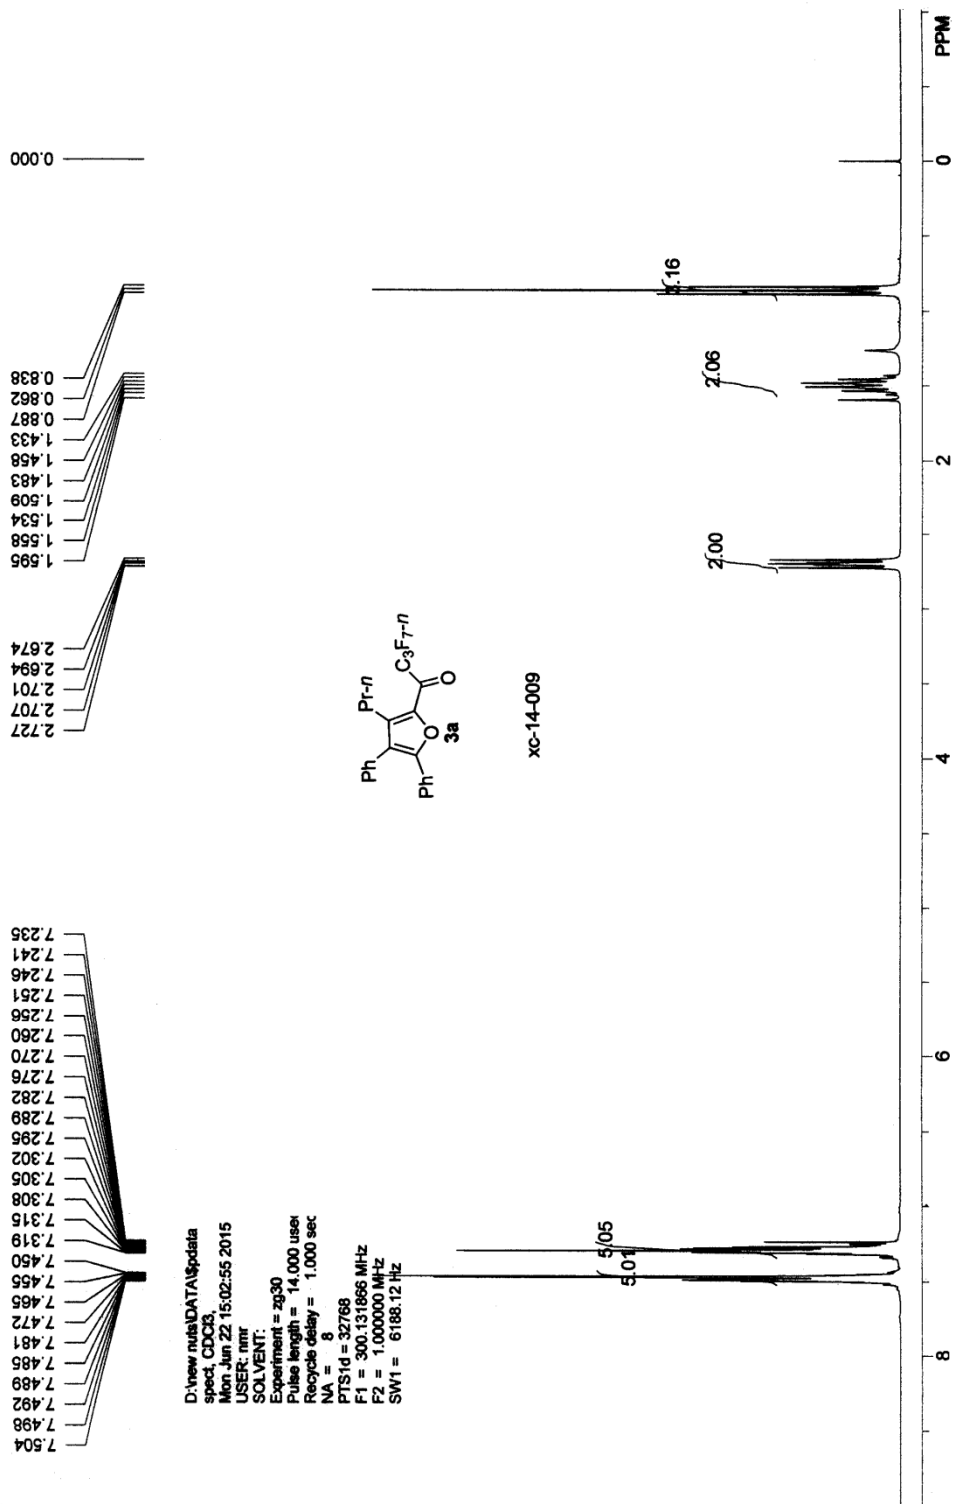

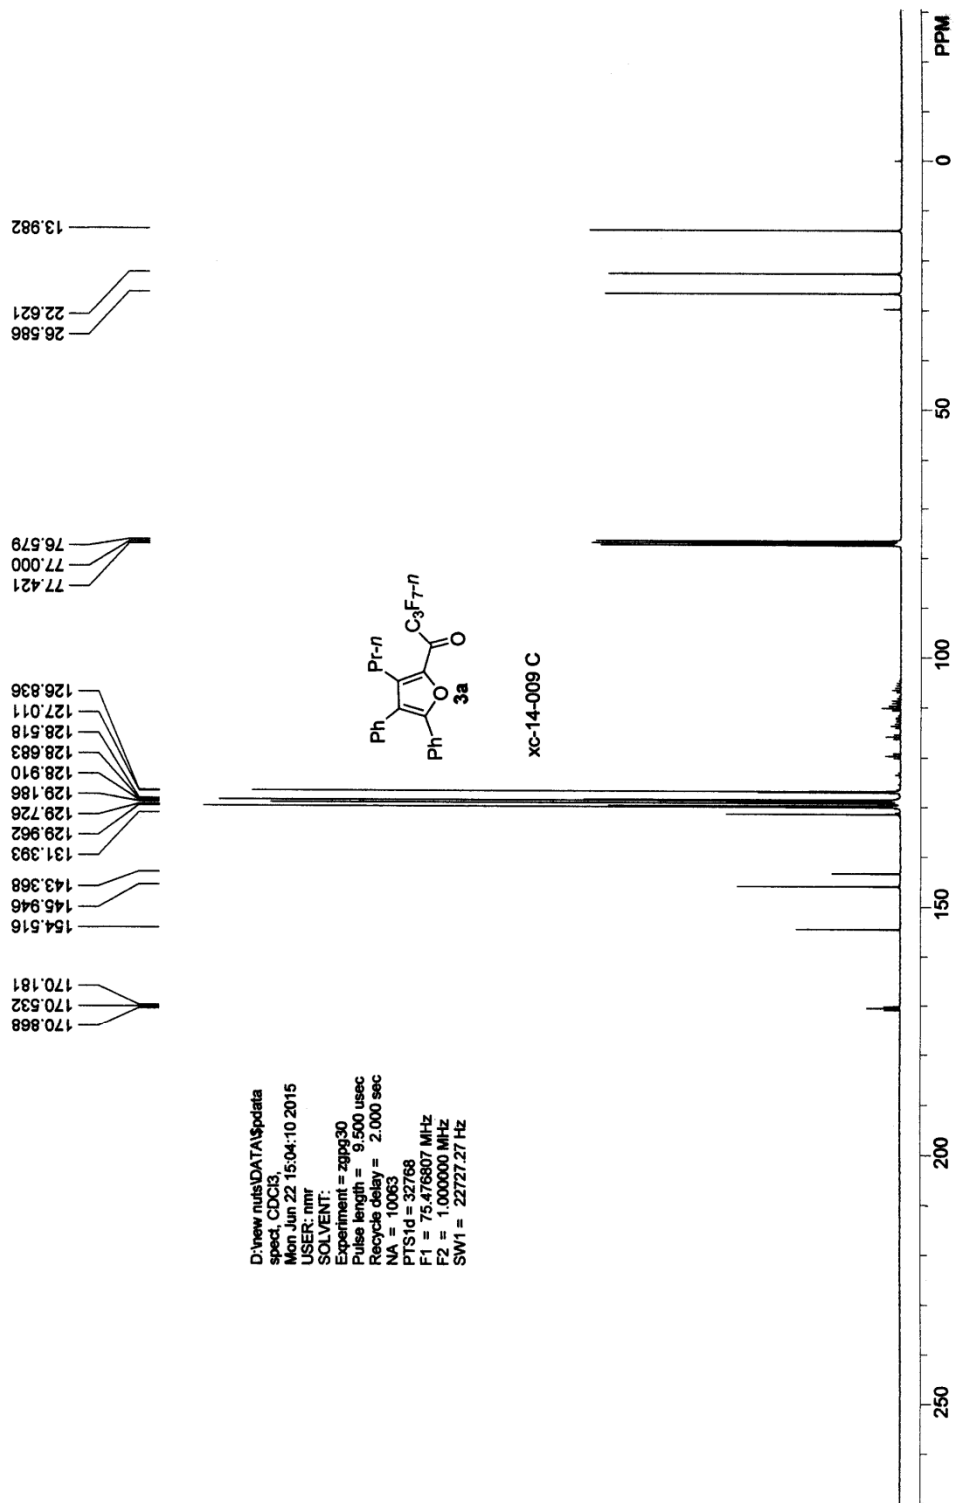

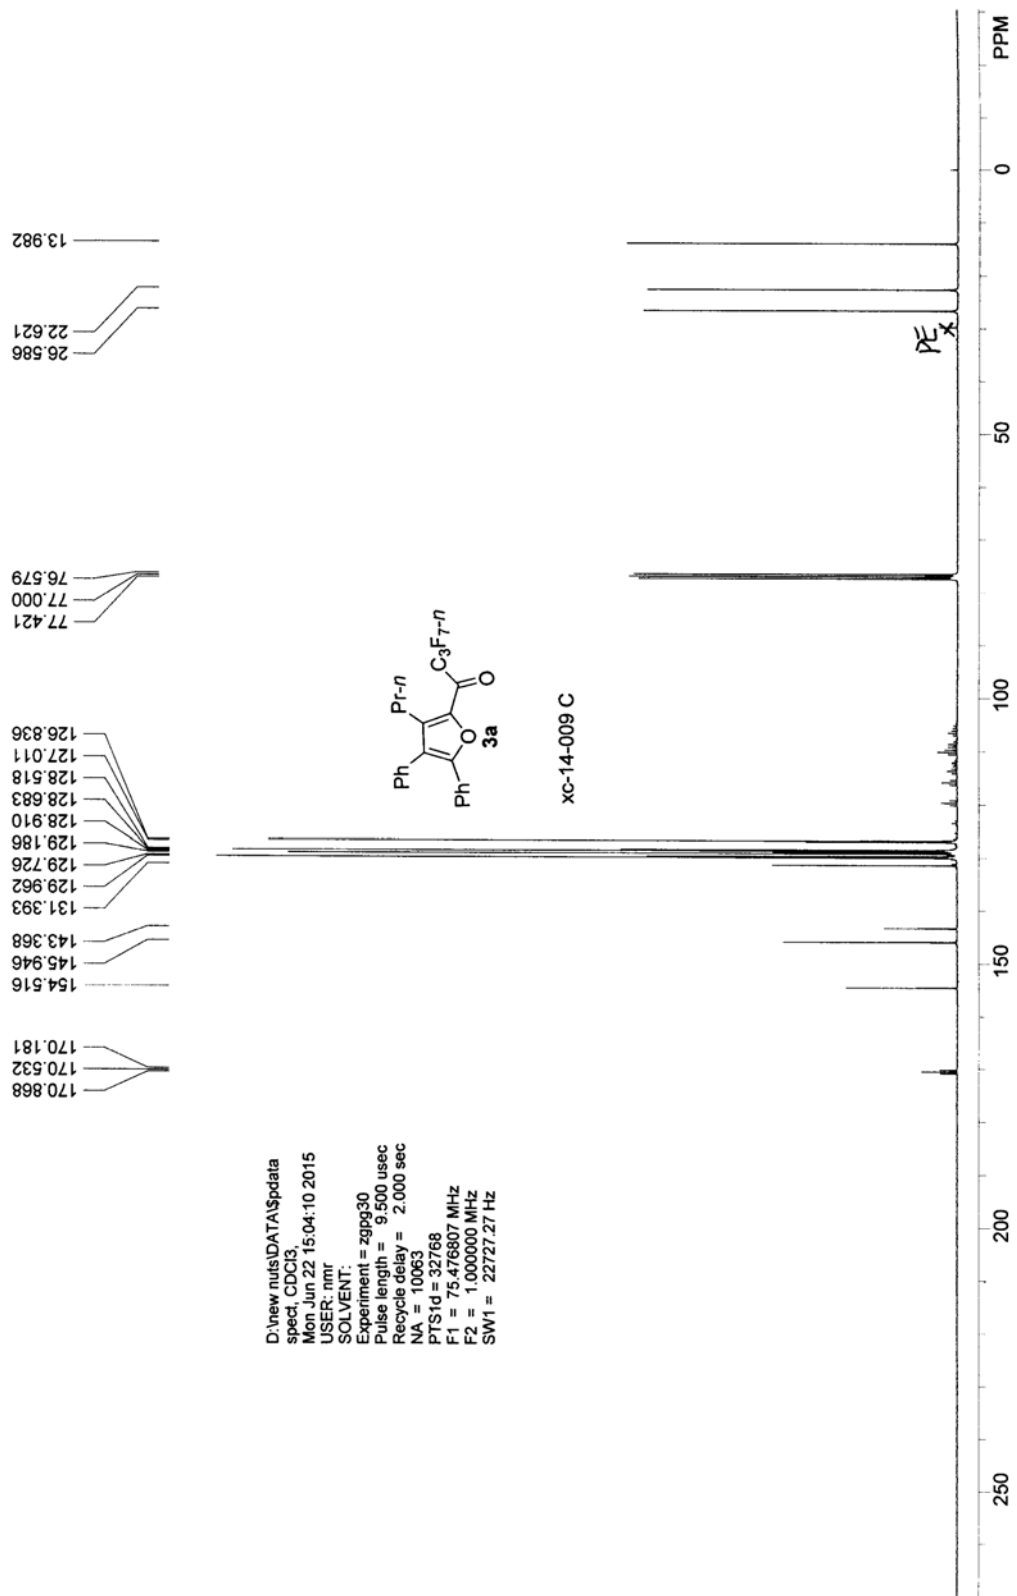

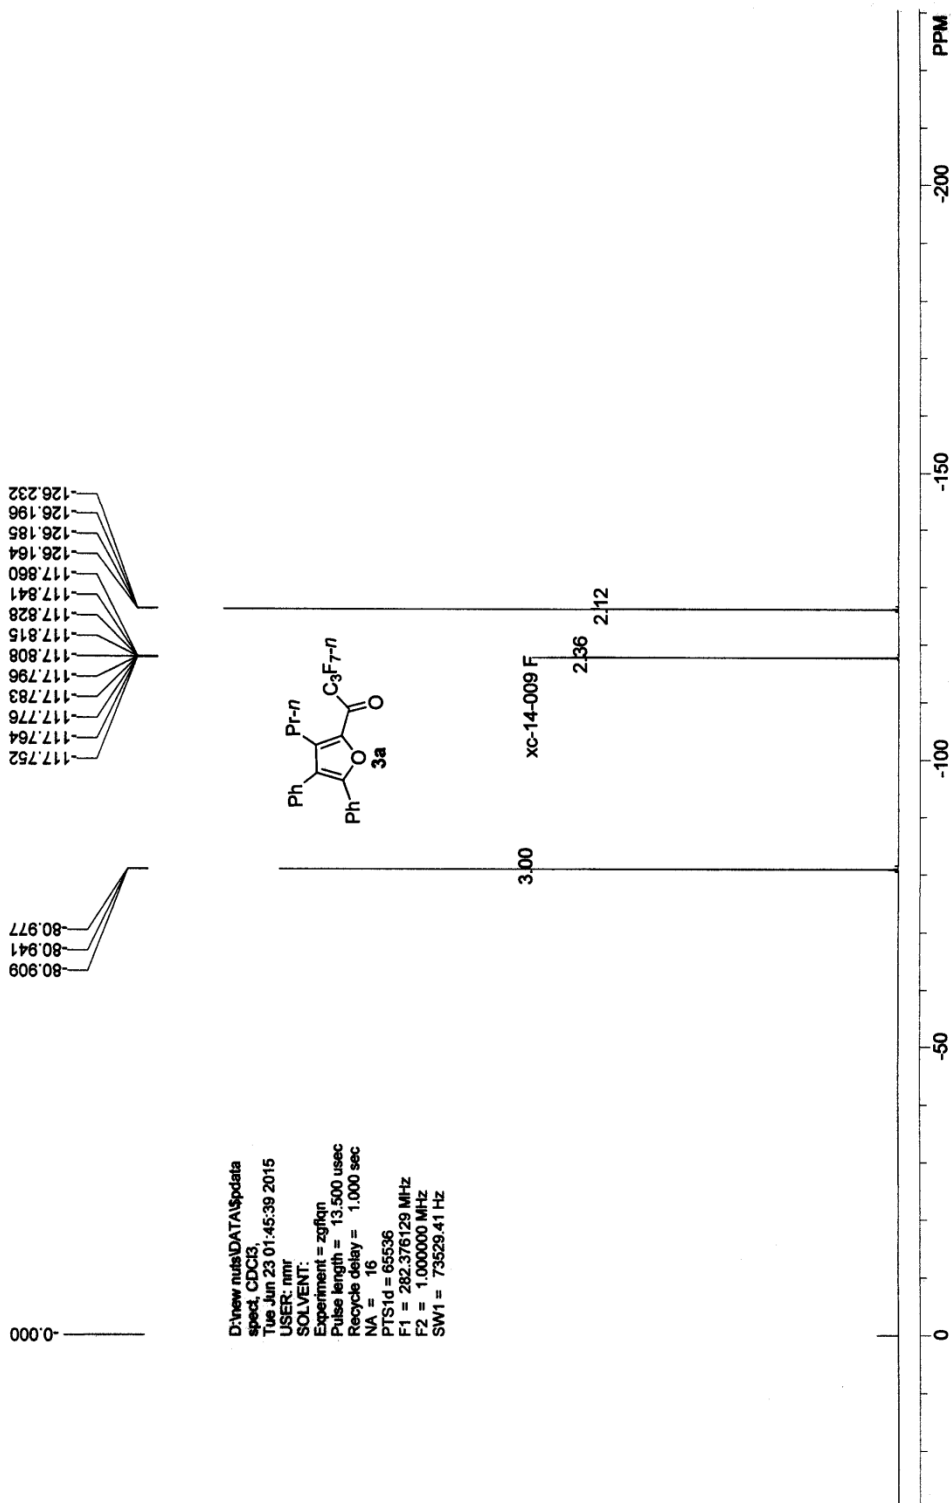

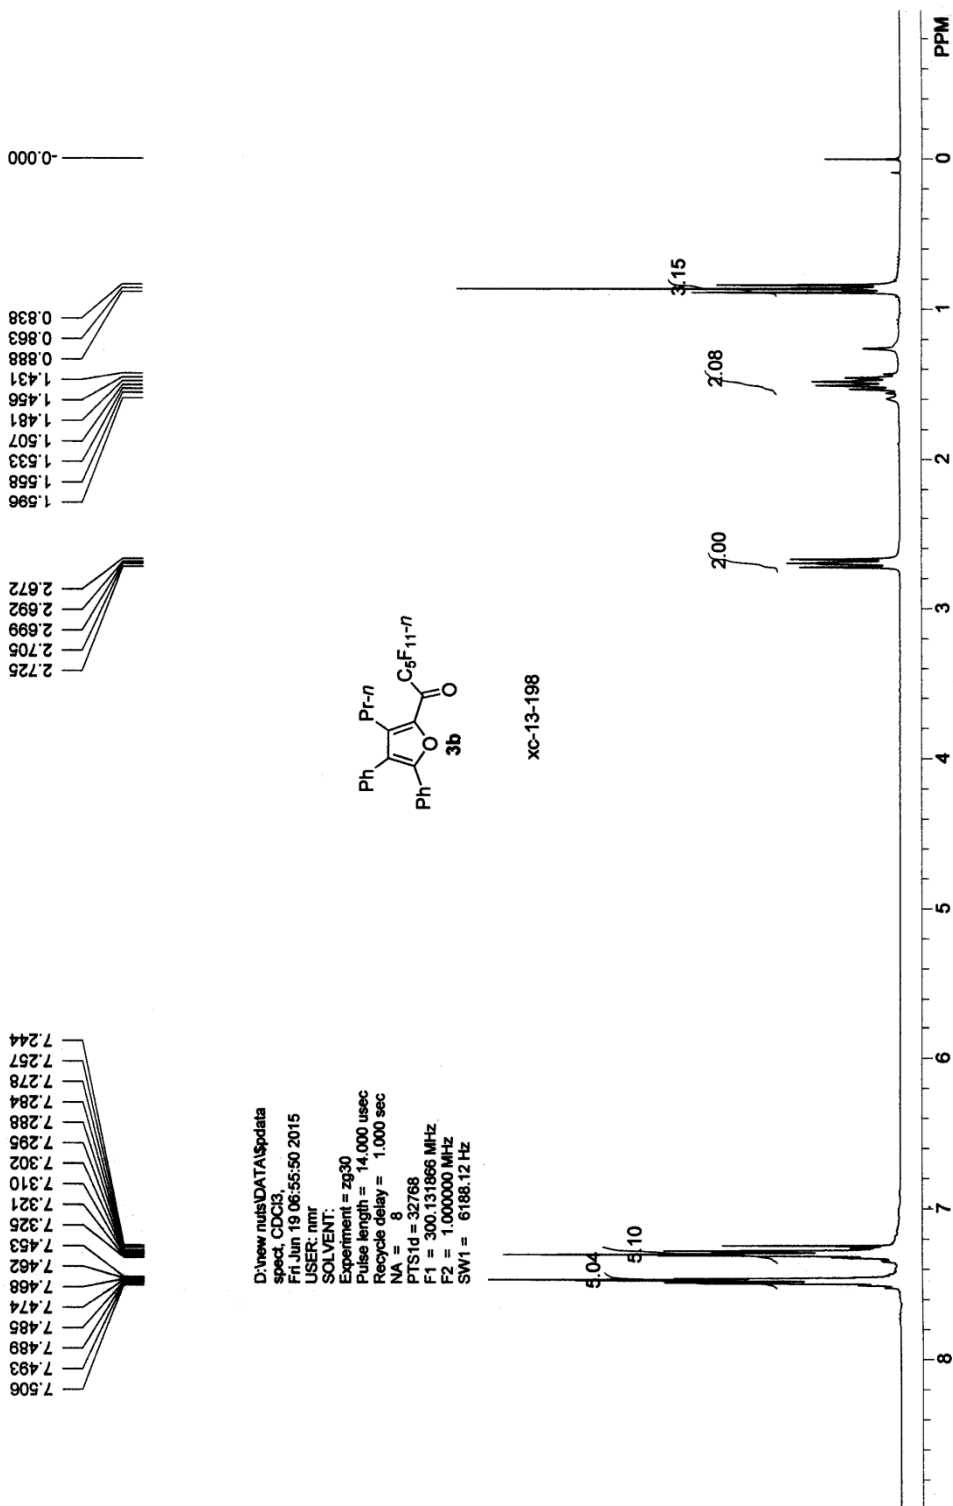



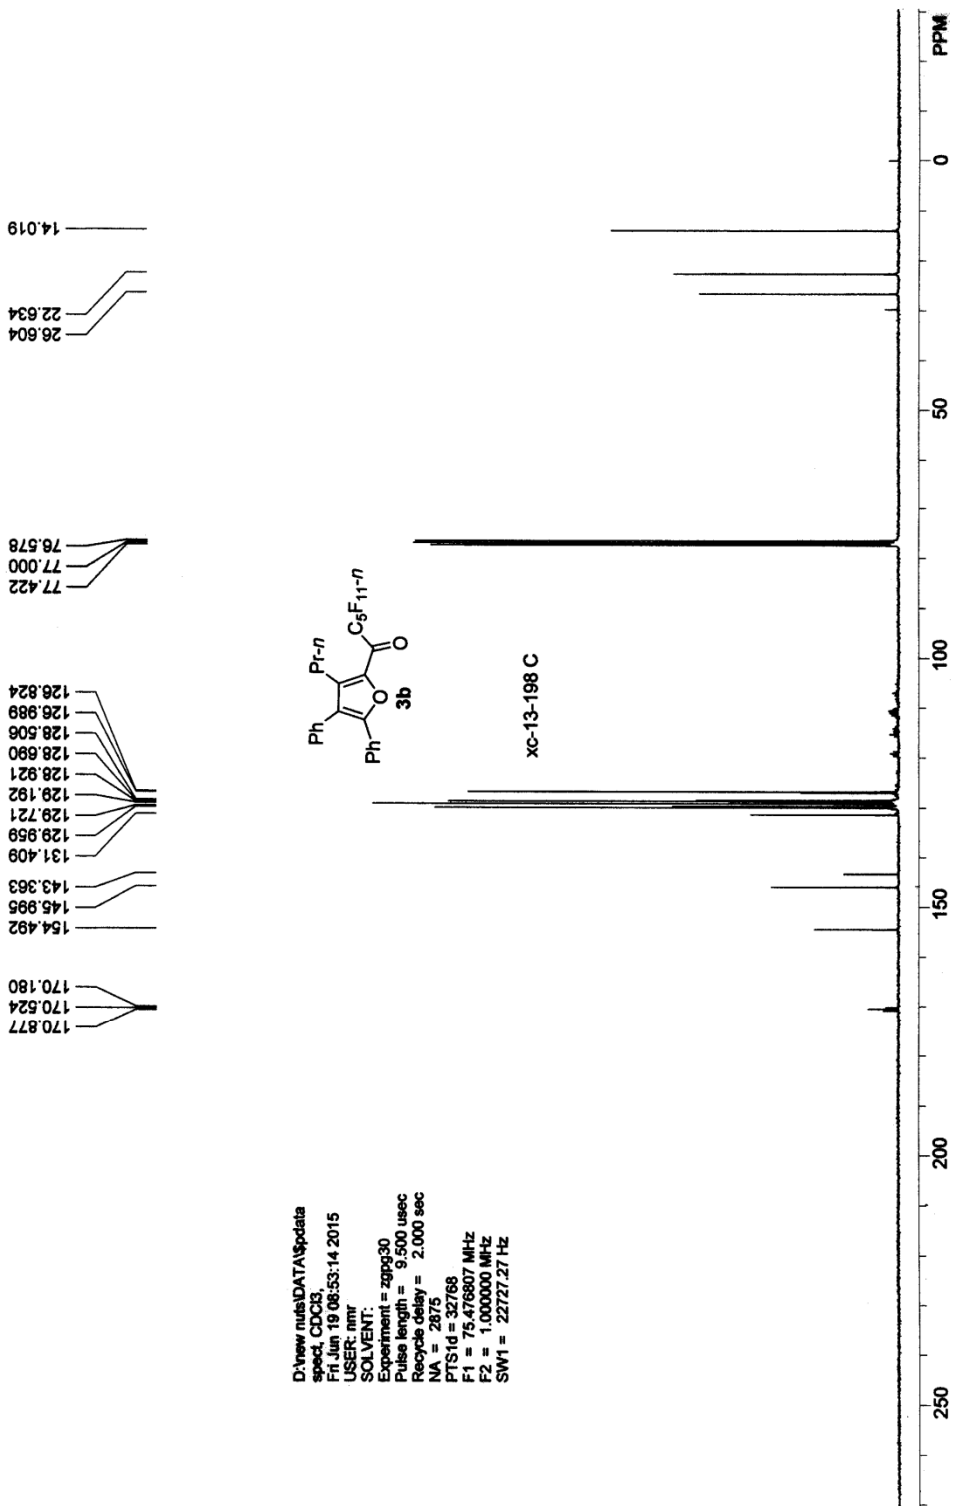

D:\new nutis\DATA\spdata  
 spect, CQC8,  
 Fri Jun 19 08:53:14 2015  
 USER: nmr  
 SOLVENT:  
 Experiment = zgpg30  
 Pulse length = 9.500 usec  
 Recycle delay = 2.000 sec  
 NA = 2675  
 P1S1d = 32768  
 P1 = 75.476807 MHz  
 P2 = 1.000000 MHz  
 SW1 = 22727.27 Hz

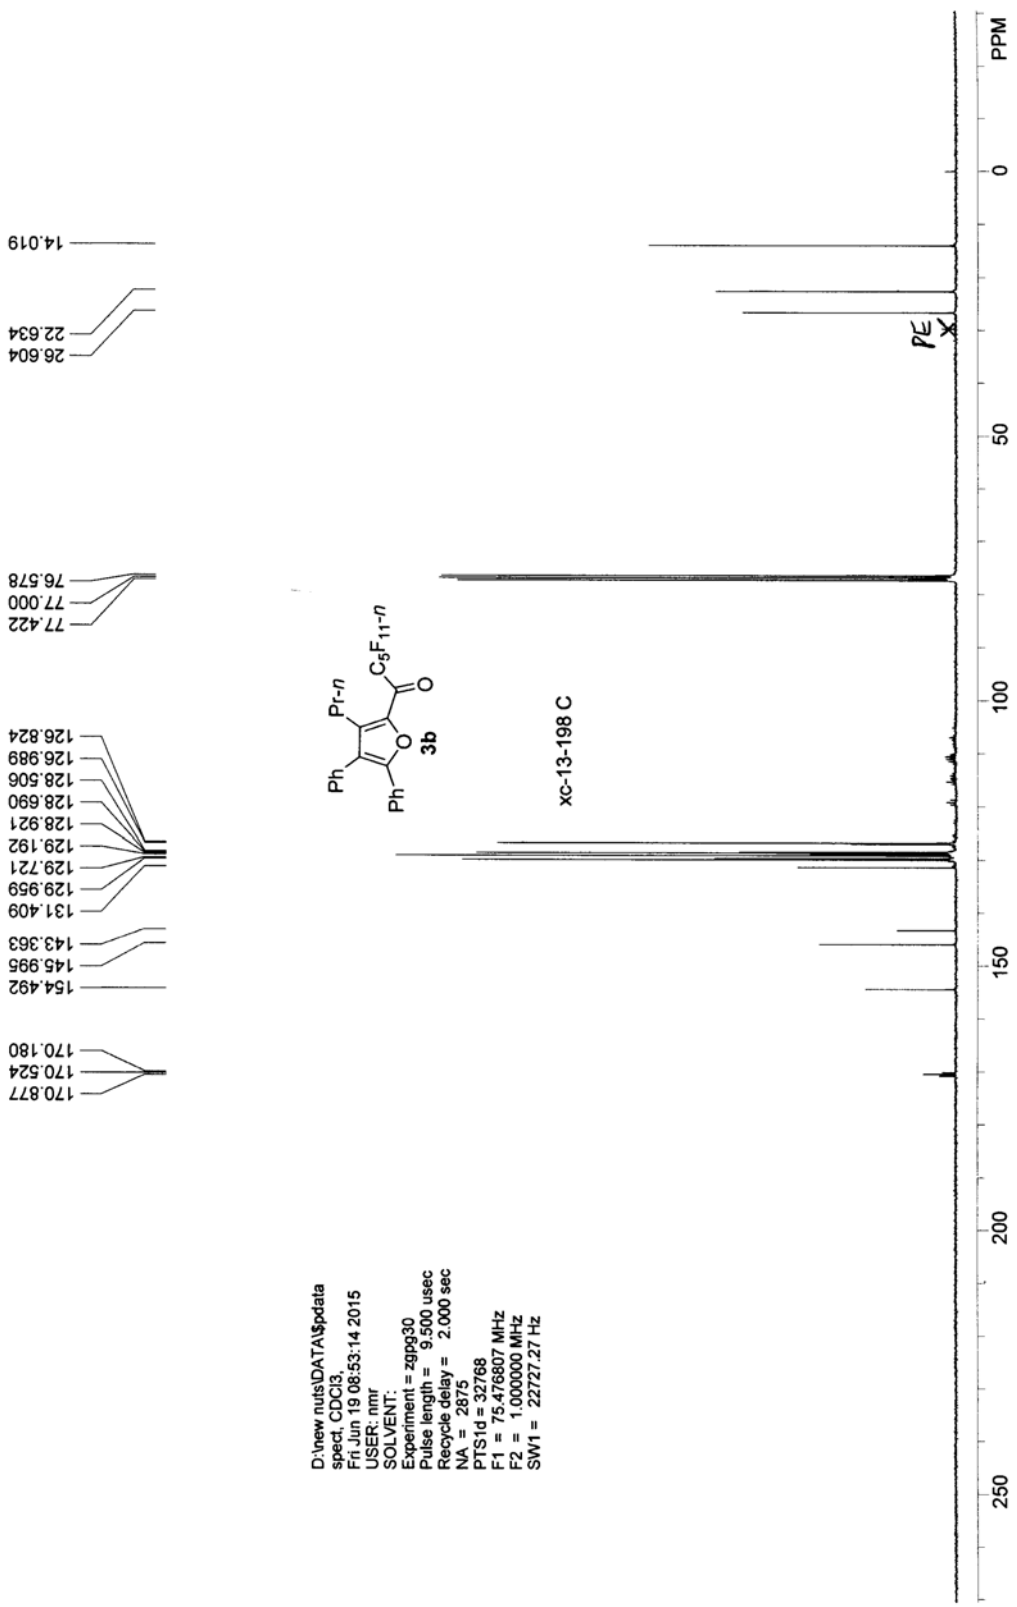

D:\new nuts\DATA\p\data  
 spect, CDCI3.  
 Fri Jun 19 08:53:14 2015  
 USER: nmf  
 SOLVENT:  
 Experiment = zgpg30  
 Pulse length = 9.500 usec  
 Recycle delay = 2.000 sec  
 NA = 2875  
 PTS1d = 32768  
 F1 = 75.476807 MHz  
 F2 = 1.000000 MHz  
 SW1 = 22727.27 Hz

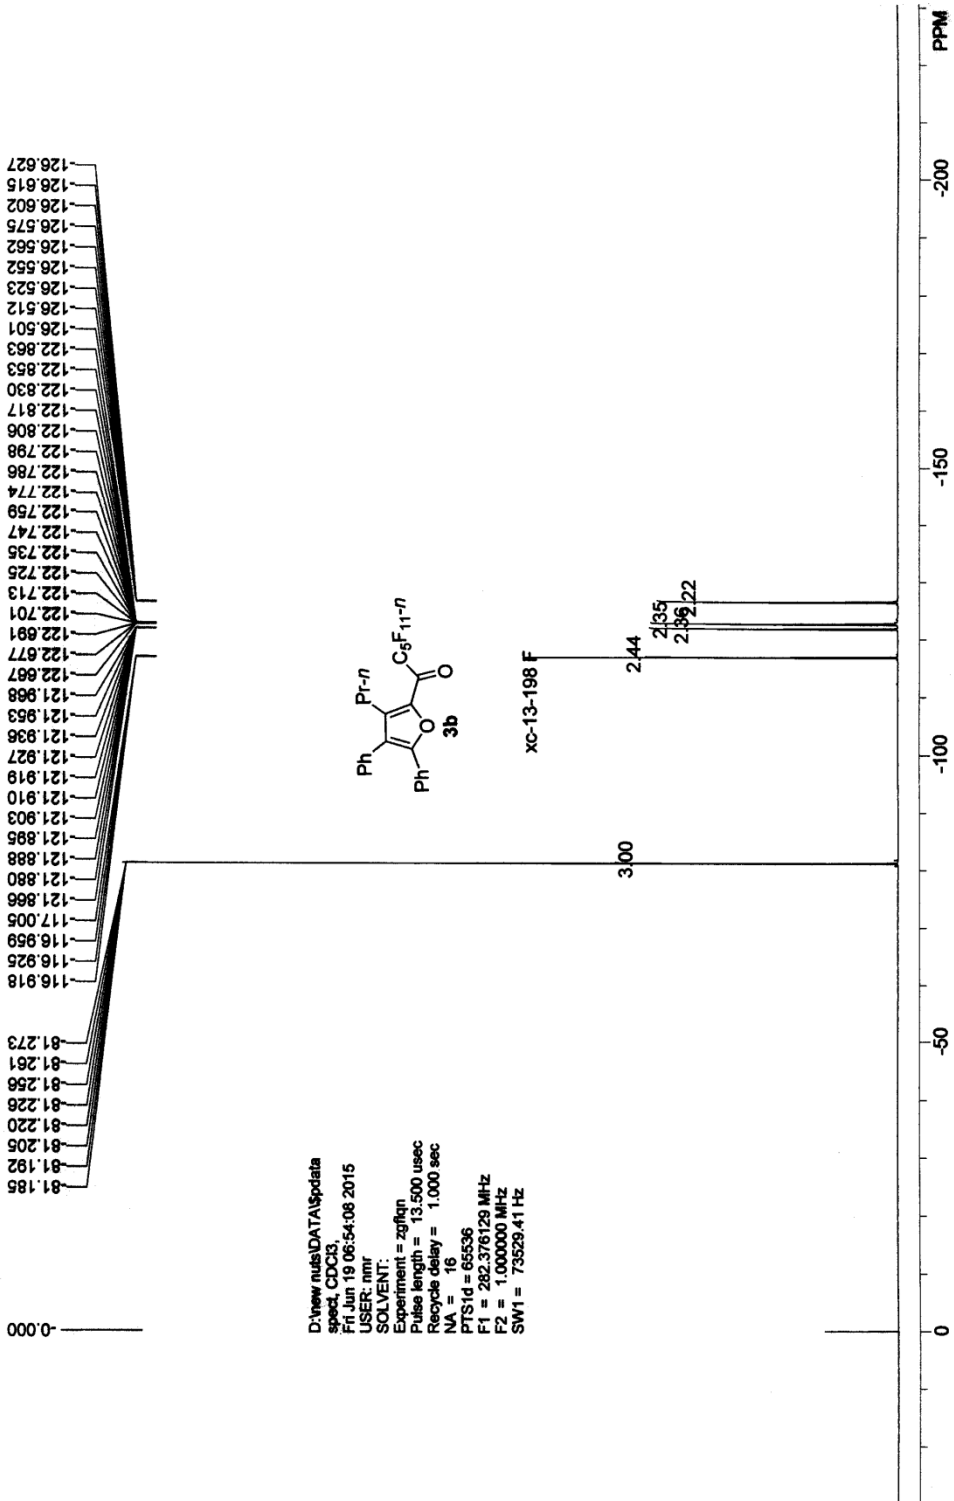

7.519  
7.514  
7.507  
7.504  
7.501  
7.494  
7.488  
7.486  
7.481  
7.475  
7.472  
7.470  
7.467  
7.463  
7.333  
7.324  
7.319  
7.313  
7.306  
7.296  
7.287  
7.278  
7.273  
7.268  
7.244

D:\new nuts\DATA\Spdata  
spect\_CD03  
Wed Jun 17 13:29:20 2015  
USER: nmr  
SOLVENT:  
Experiment = z930  
Pulse length = 14,000 usec  
Recycle delay = 1,000 sec  
NA = 8  
PTSD = 32768  
F1 = 300.131866 MHz  
F2 = 1,000,000 MHz  
SW1 = 6188.12 Hz

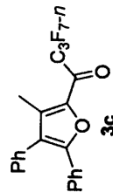

5.03  
5.05

3.00

xc-13-197

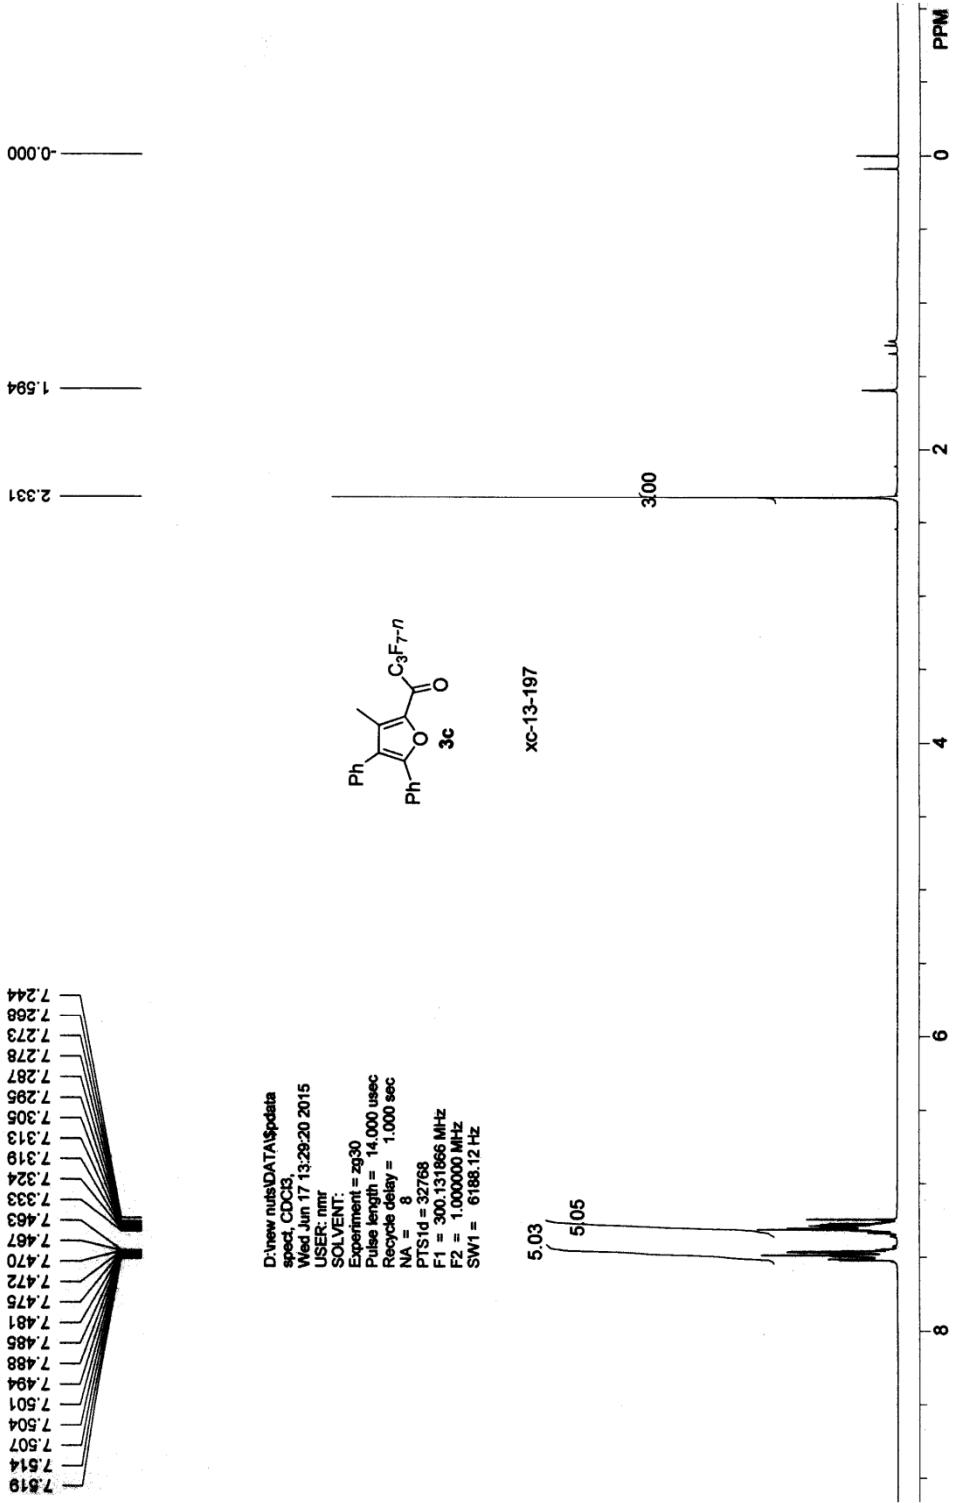

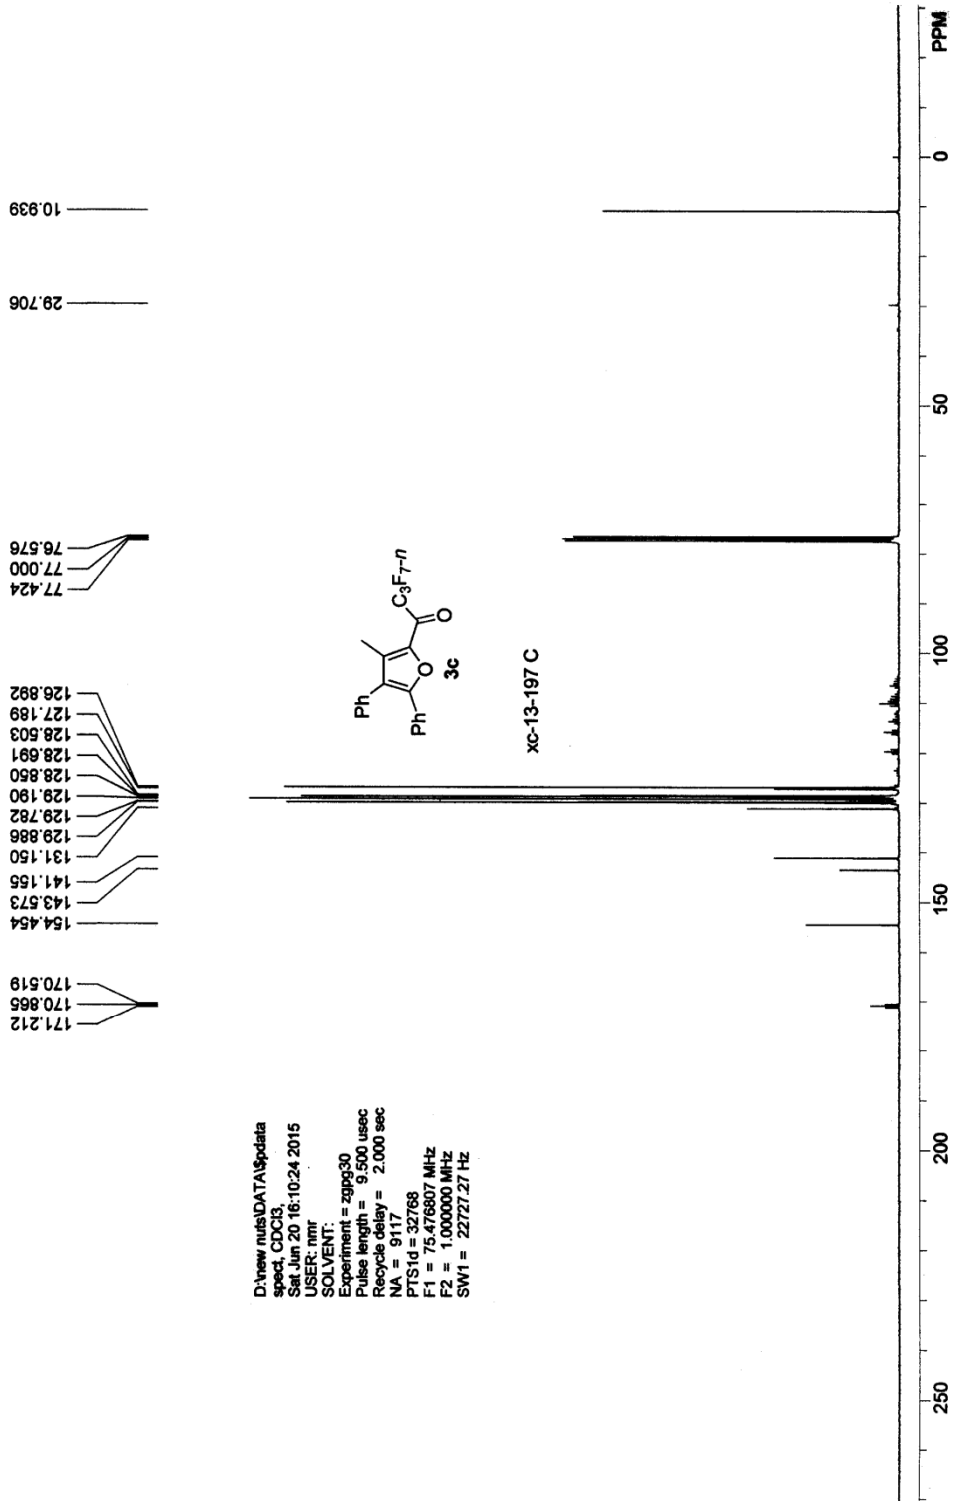

D:\new nus\DATA\sp\data  
 spect, CDC13,  
 Sat Jun 20 16:10:24 2015  
 USER: nmr  
 SOLVENT:  
 Experiment = zppg30  
 Pulse length = 9.500 usec  
 Recycle delay = 2.000 sec  
 NA = 9117  
 PTS1d = 32768  
 F1 = 75.476807 MHz  
 F2 = 1.000000 MHz  
 SW1 = 22727.27 Hz

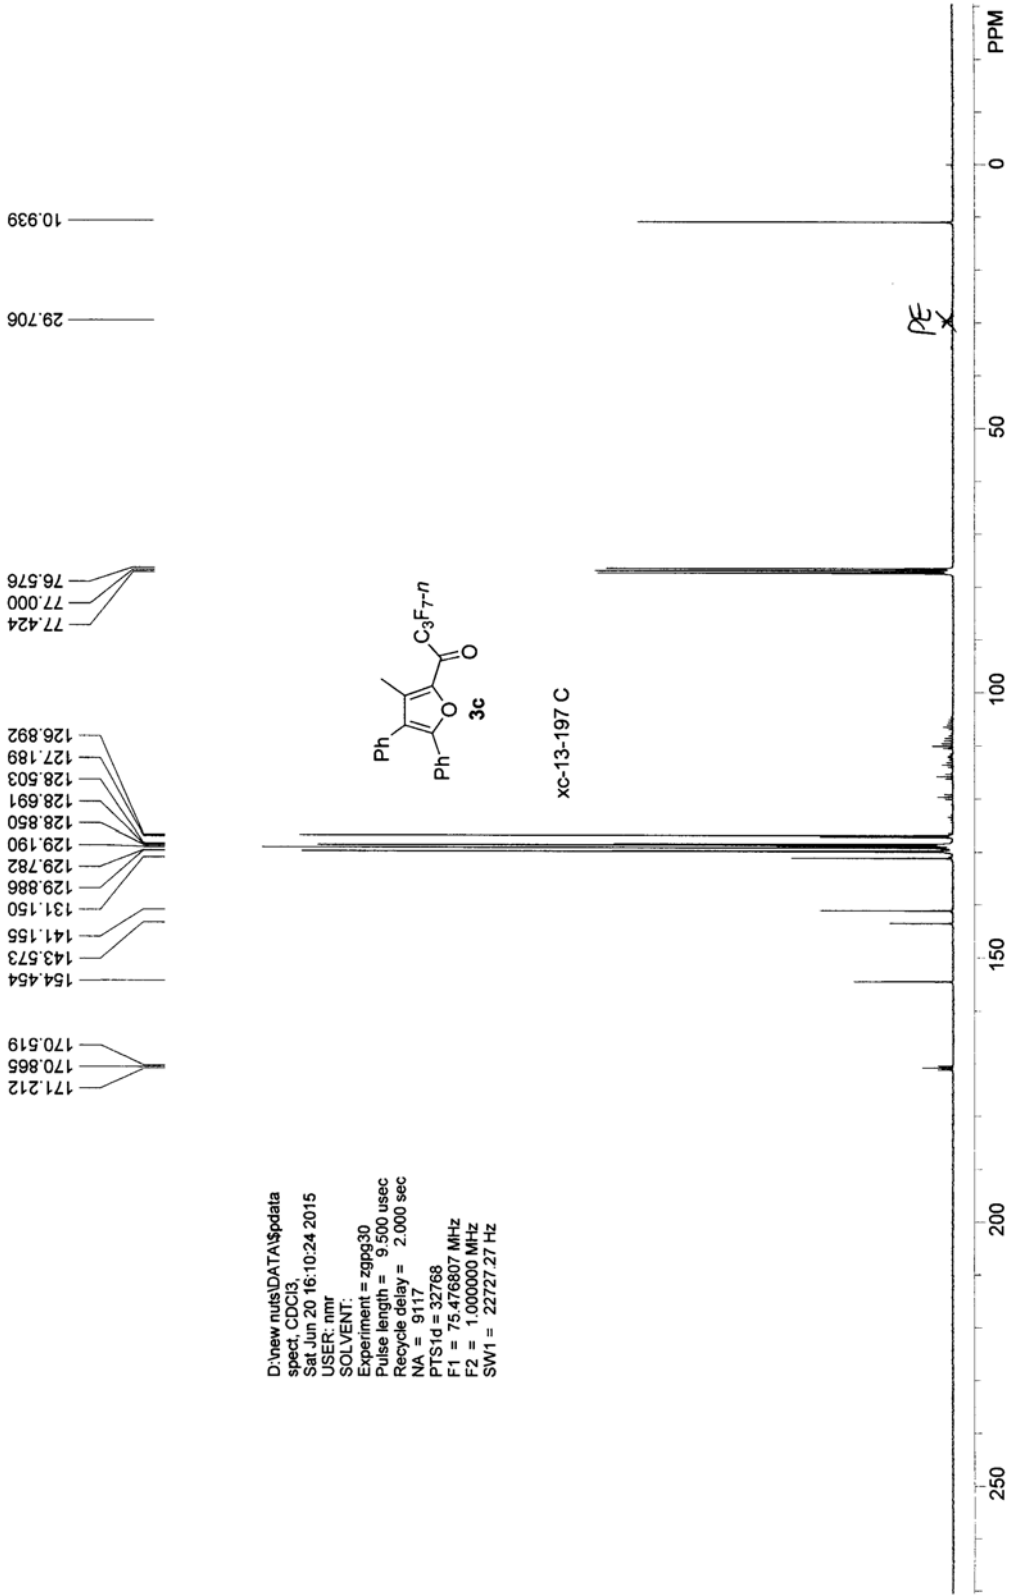

D:\new nuts\DATA\spdata  
 spect, CDCl3,  
 Sat Jun 20 16:10:24 2015  
 USER: nmr  
 SOLVENT:  
 Experiment = zgpg30  
 Pulse length = 9.500 usec  
 Recycle delay = 2.000 sec  
 NA = 9117  
 P1 = 32768  
 F1 = 75.476807 MHz  
 F2 = 1.000000 MHz  
 SW1 = 22727.27 Hz

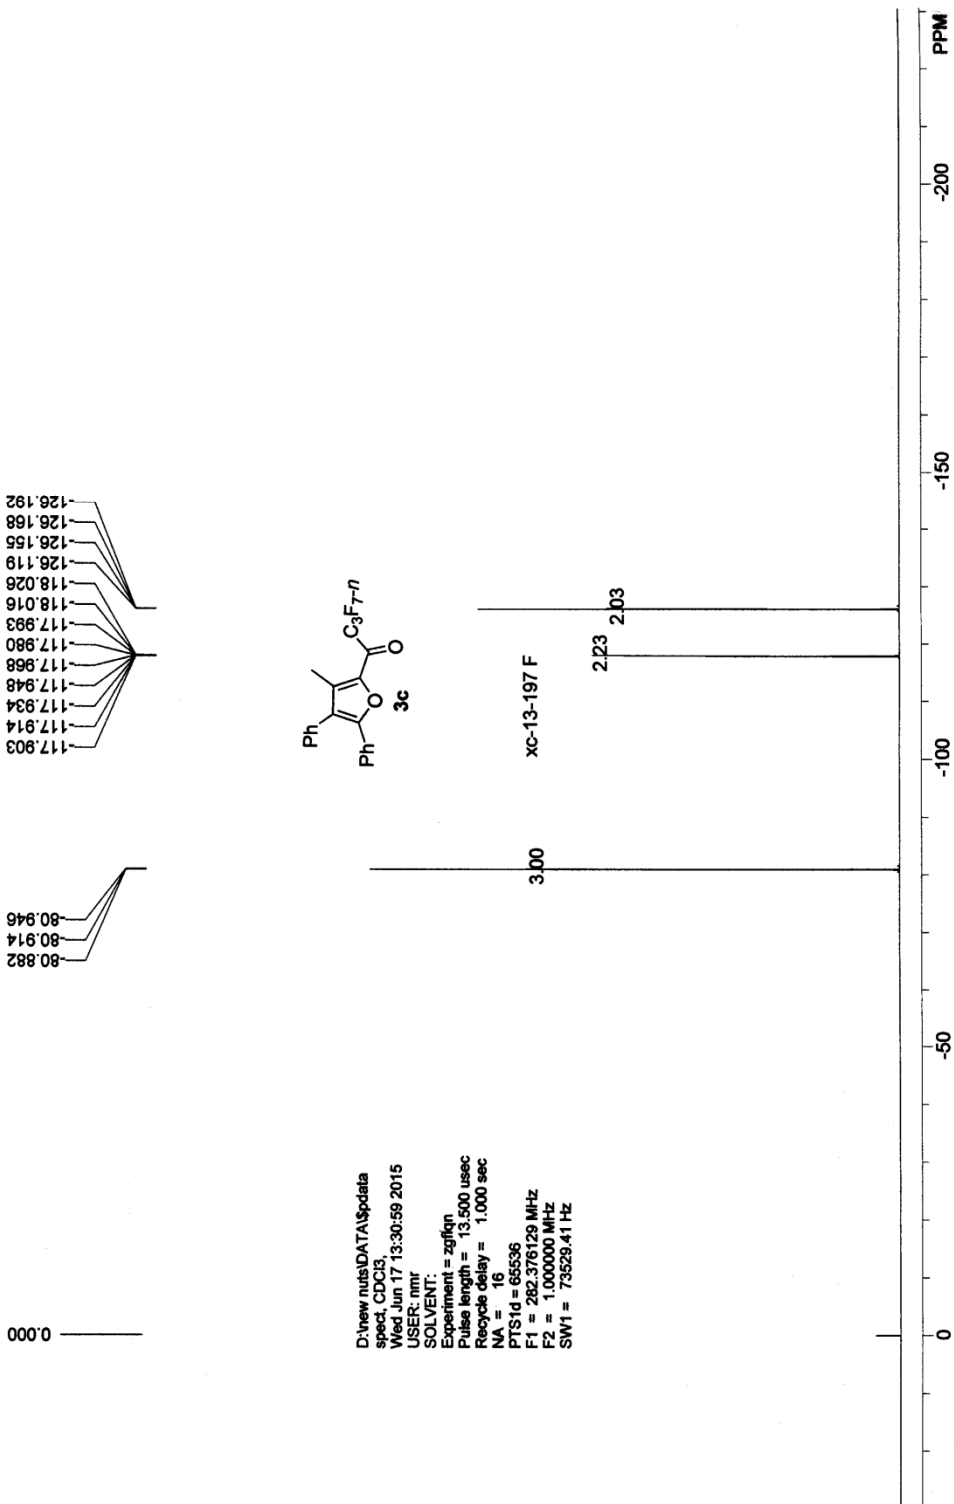

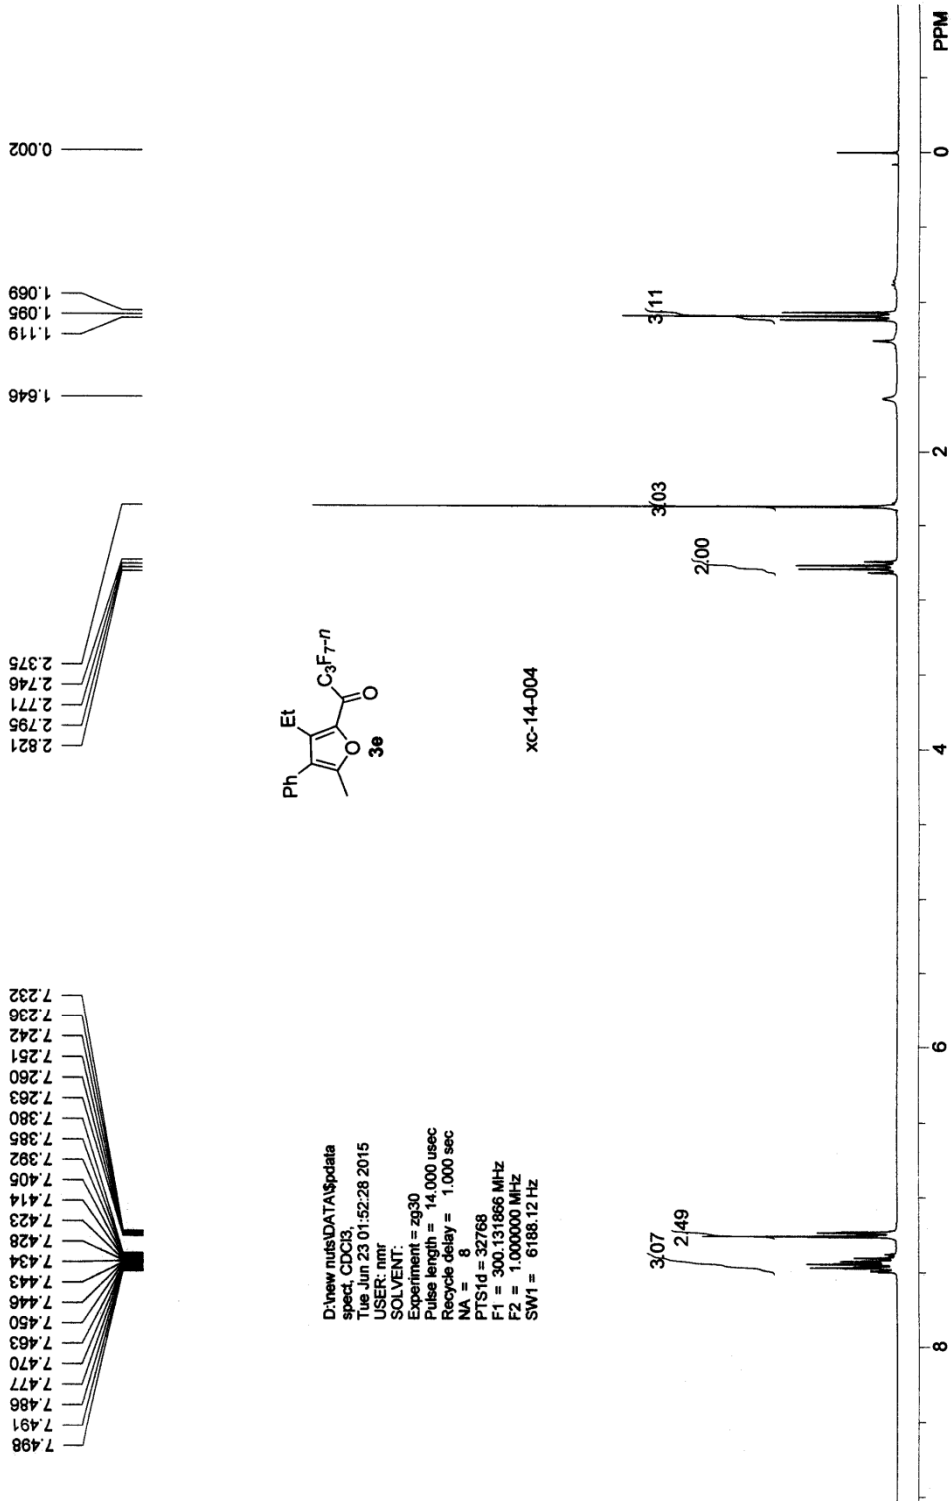



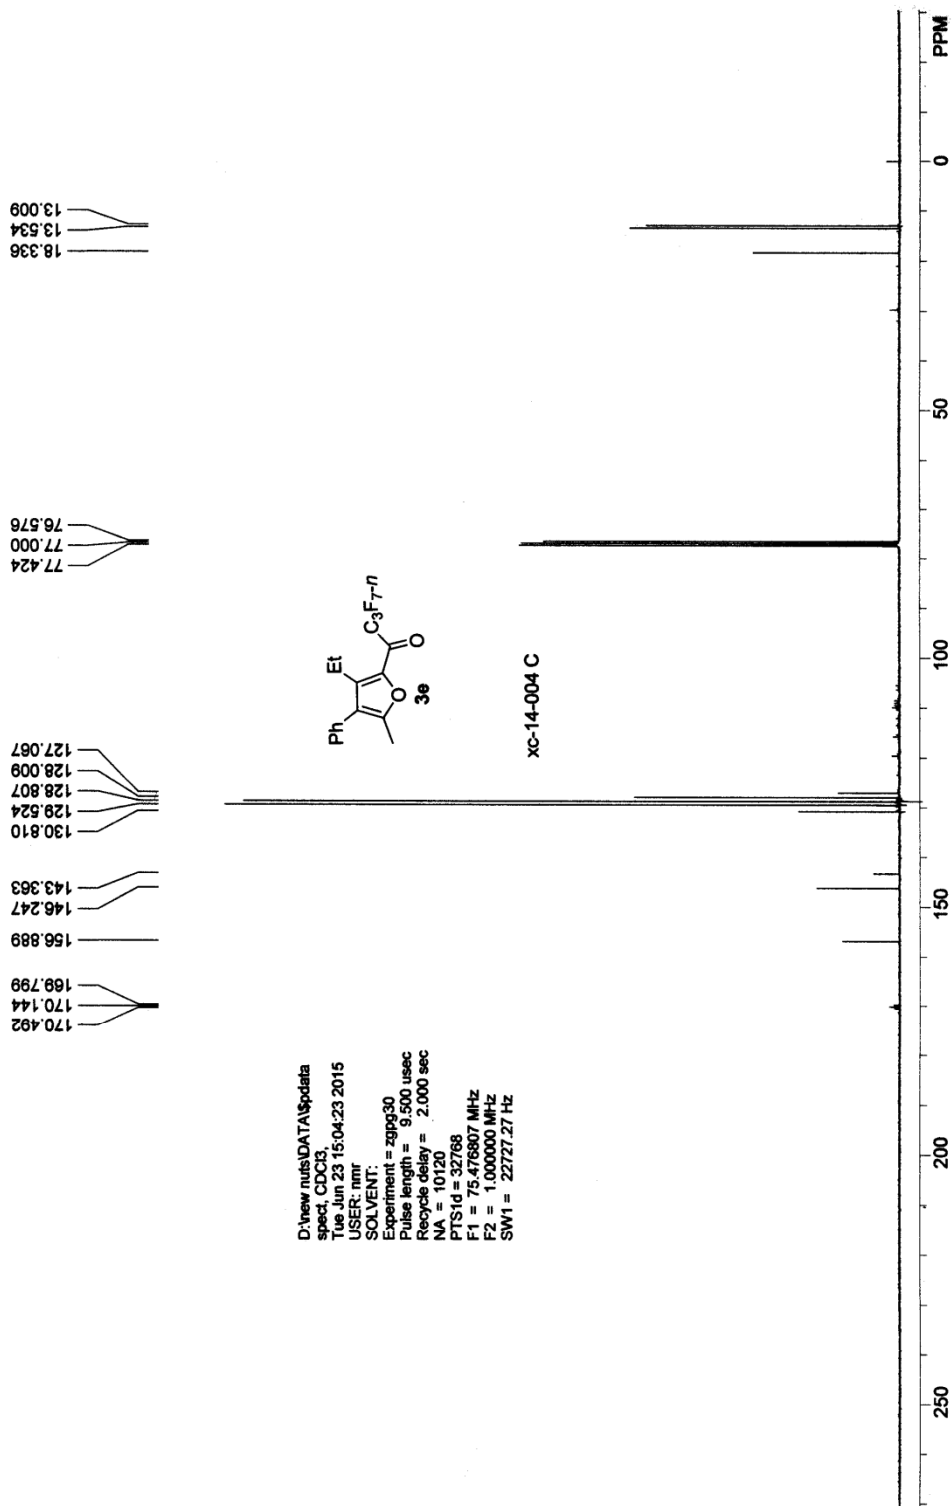

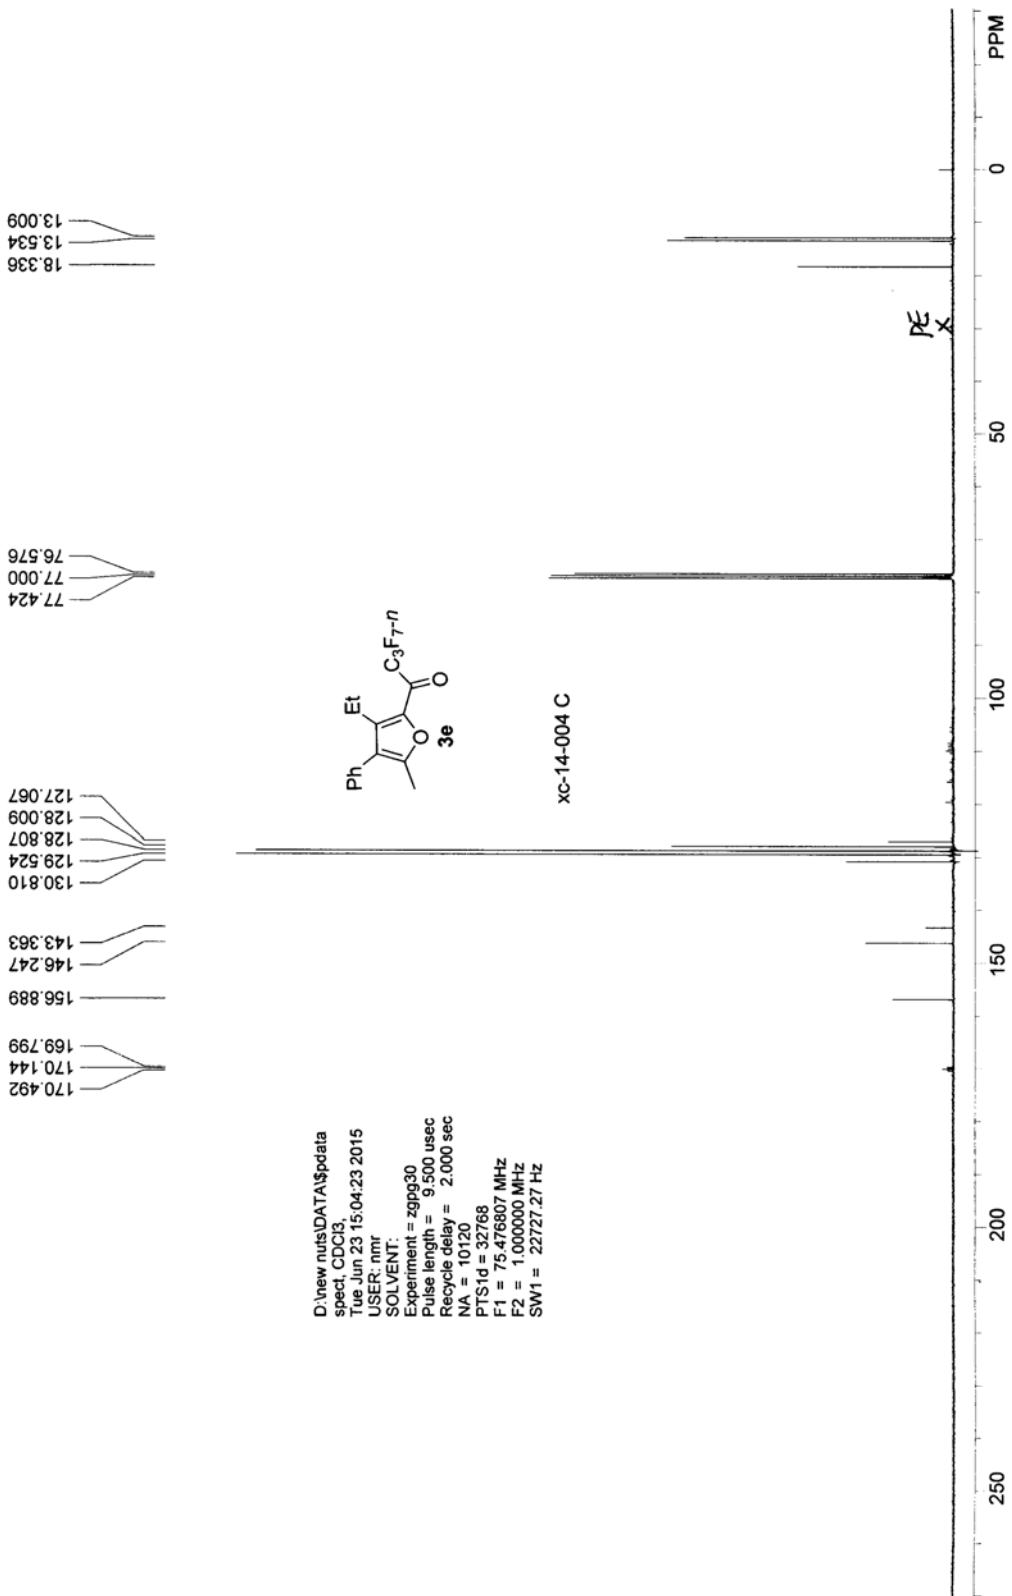

D:\new\_nuis\DATA\p\data  
 spect, CDCI3,  
 Tue Jun 23 15:04:23 2015  
 USER: nmr  
 SOLVENT:  
 Experiment = zpgg30  
 Pulse length = 9.500 usec  
 Recycle delay = 2.000 sec  
 NA = 10120  
 P1S1d = 32768  
 F1 = 75.476807 MHz  
 F2 = 1.000000 MHz  
 SW1 = 22727.27 Hz

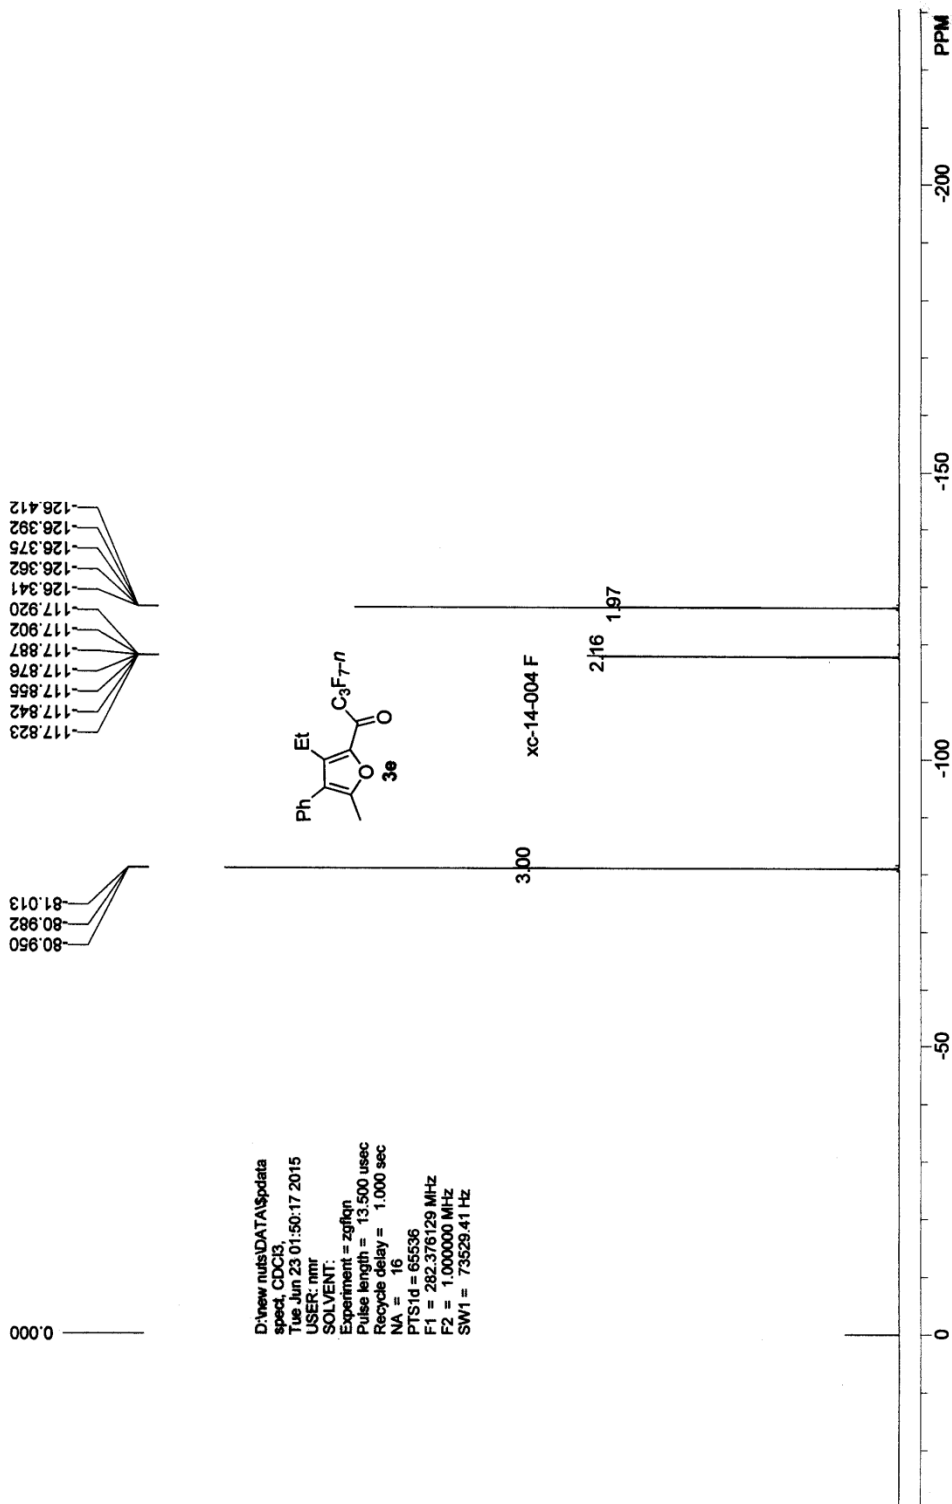

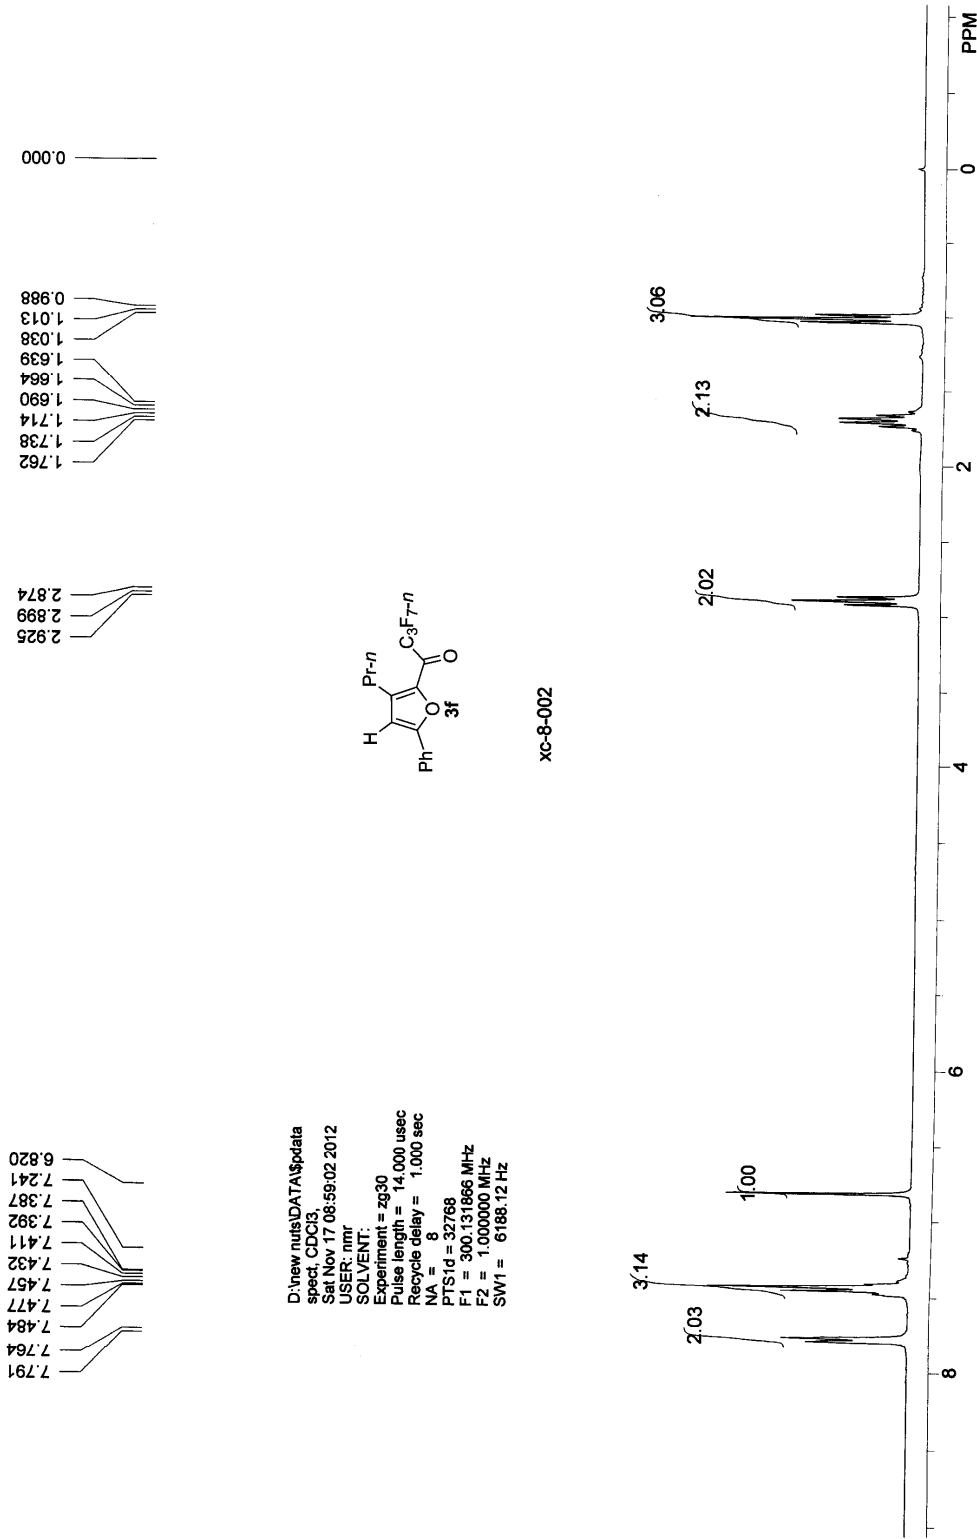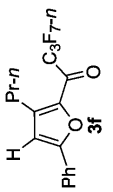

xc-8-002

D:\new nuts\DATA\pdata  
 spect, CDCI3,  
 Sat Nov 17 08:59:02 2012  
 USER: nmr  
 SOLVENT:  
 Experiment = zg30  
 Pulse length = 14,000 usec  
 Recycle delay = 1,000 sec  
 NA = 8  
 P1 = 32768  
 F1 = 300.131866 MHz  
 F2 = 1,000000 MHz  
 SW1 = 6188.12 Hz

7.791  
 7.764  
 7.484  
 7.477  
 7.457  
 7.432  
 7.411  
 7.392  
 7.387  
 7.241  
 6.820

2.926  
 2.899  
 2.874

1.762  
 1.738  
 1.714  
 1.690  
 1.664  
 1.639  
 1.038  
 1.013  
 0.988

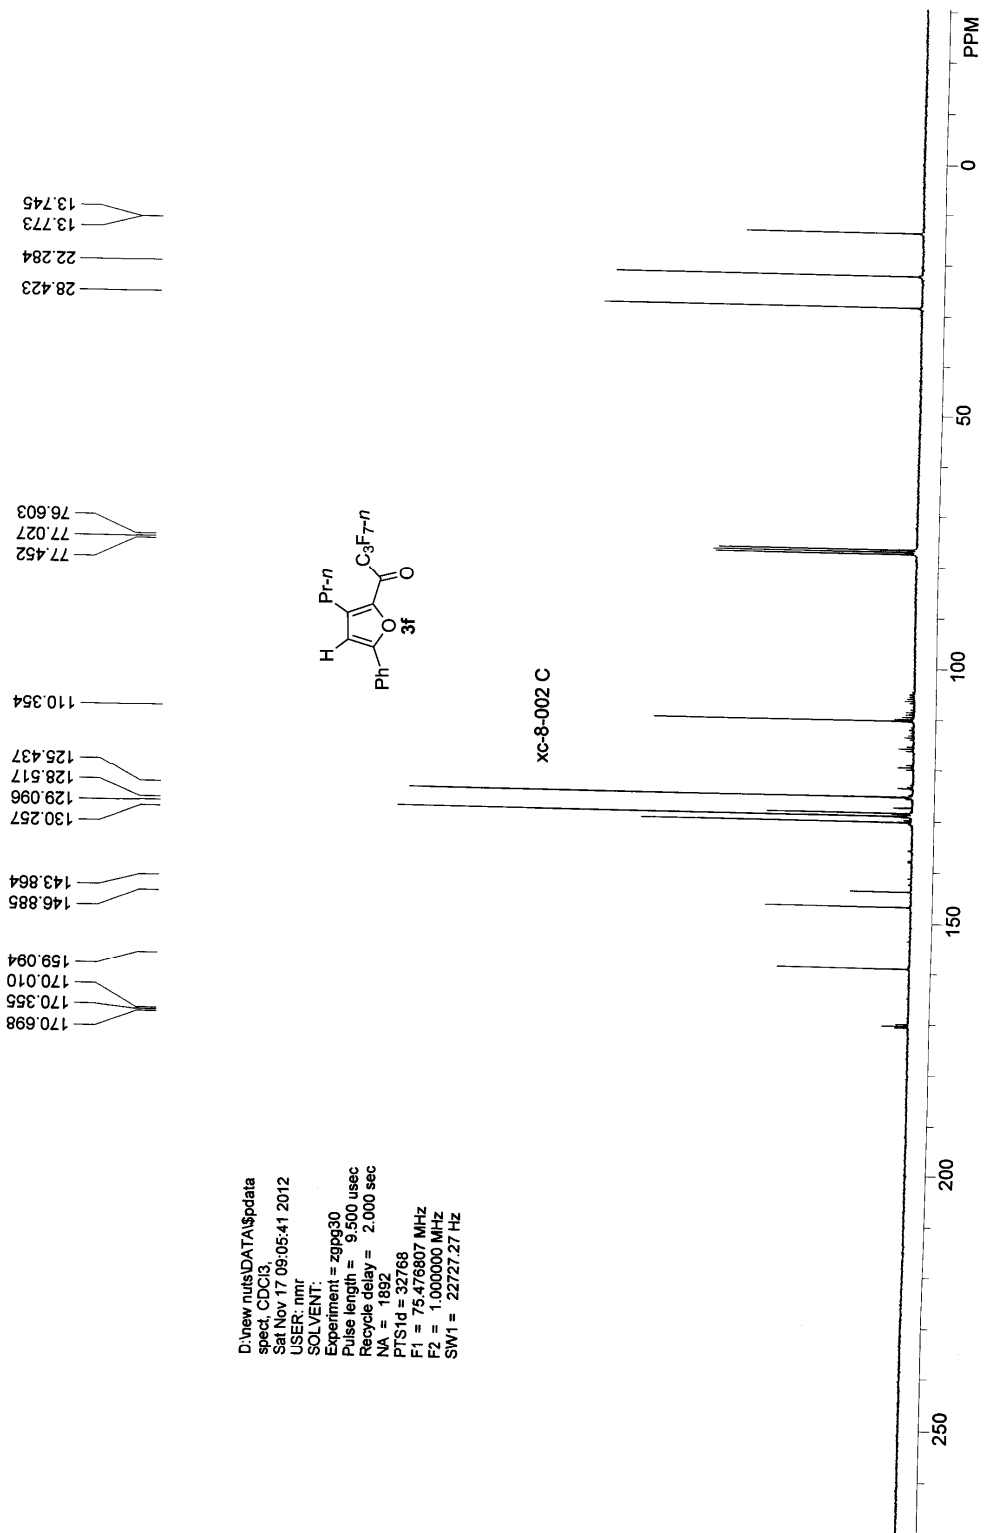

D:\new nuts\DATA\spdata  
 spect, CDCI3,  
 Sat Nov 17 09:05:41 2012  
 USER: nmr  
 SOLVENT:   
 Experiment = zq9930  
 Pulse length = 9.500 usec  
 Recycle delay = 2.000 sec  
 NA = 1892  
 P1S1d = 32768  
 F1 = 75.476807 MHz  
 F2 = 1.000000 MHz  
 SW1 = 22727.27 Hz

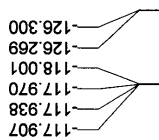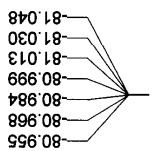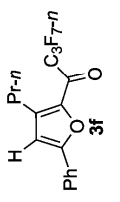

xc-8-002 F

D:\new nuts\DATA\data  
spect, CDCl<sub>3</sub>,  
Sat Nov 17 09:02:54 2012  
USER: nmr  
SOLVENT:  
Experiment = zoffen  
Pulse length = 13.500 usec  
Recycle delay = 1.000 sec  
NA = 16  
PTSD1d = 65536  
F1 = 282.376129 MHz  
F2 = 1.000000 MHz  
SW1 = 73529.41 Hz

0.000

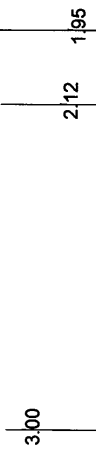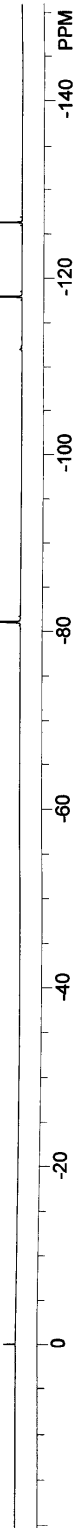

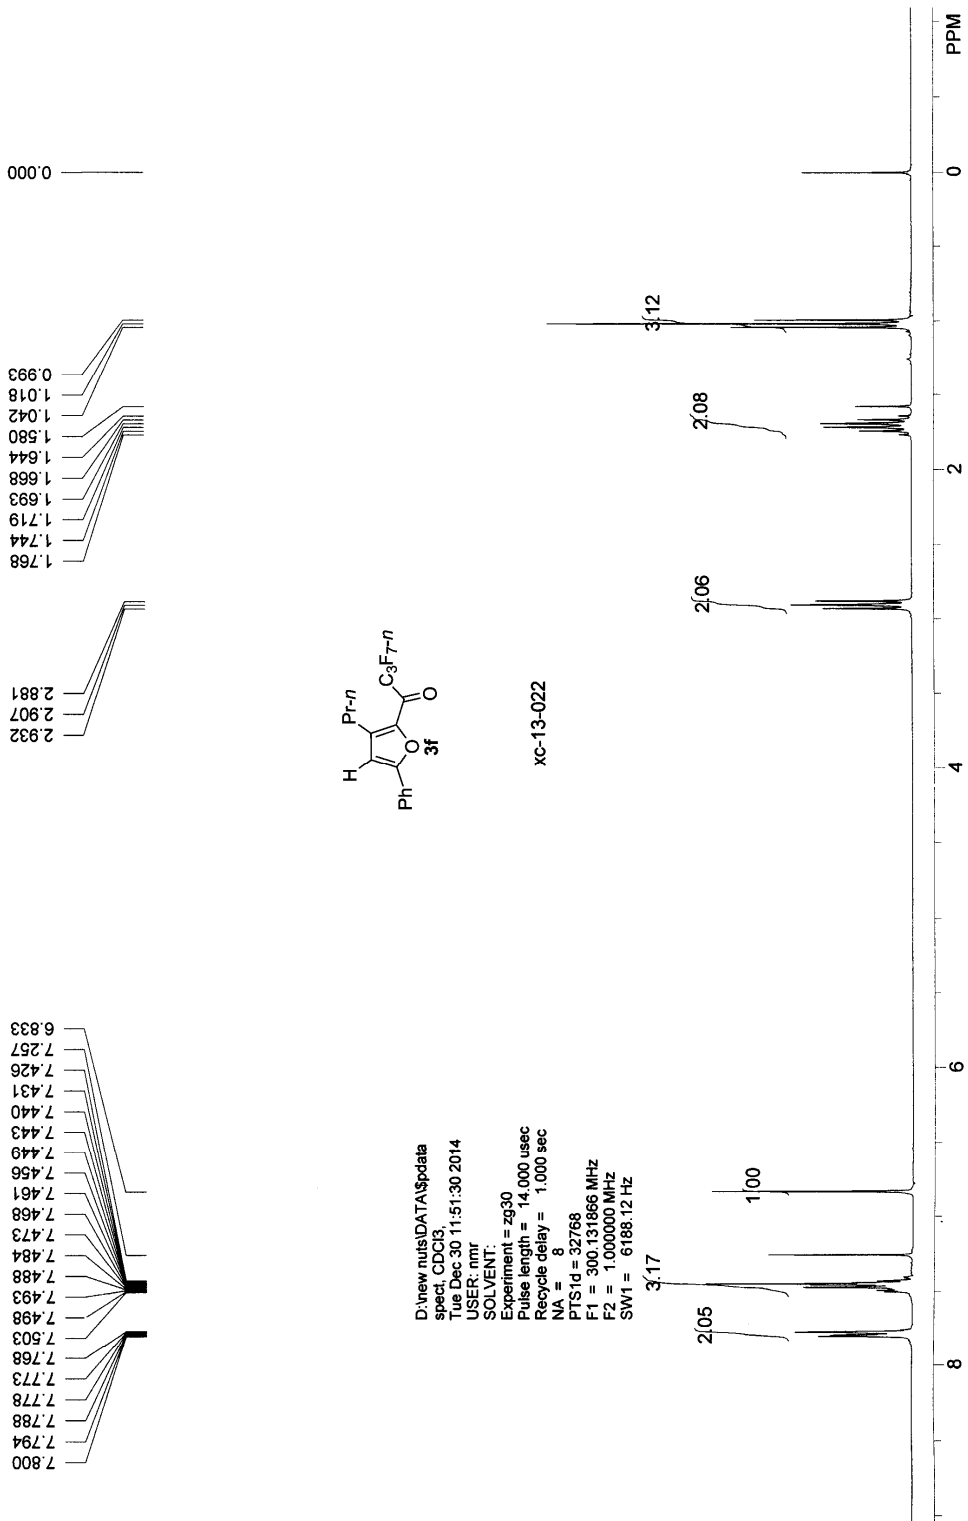

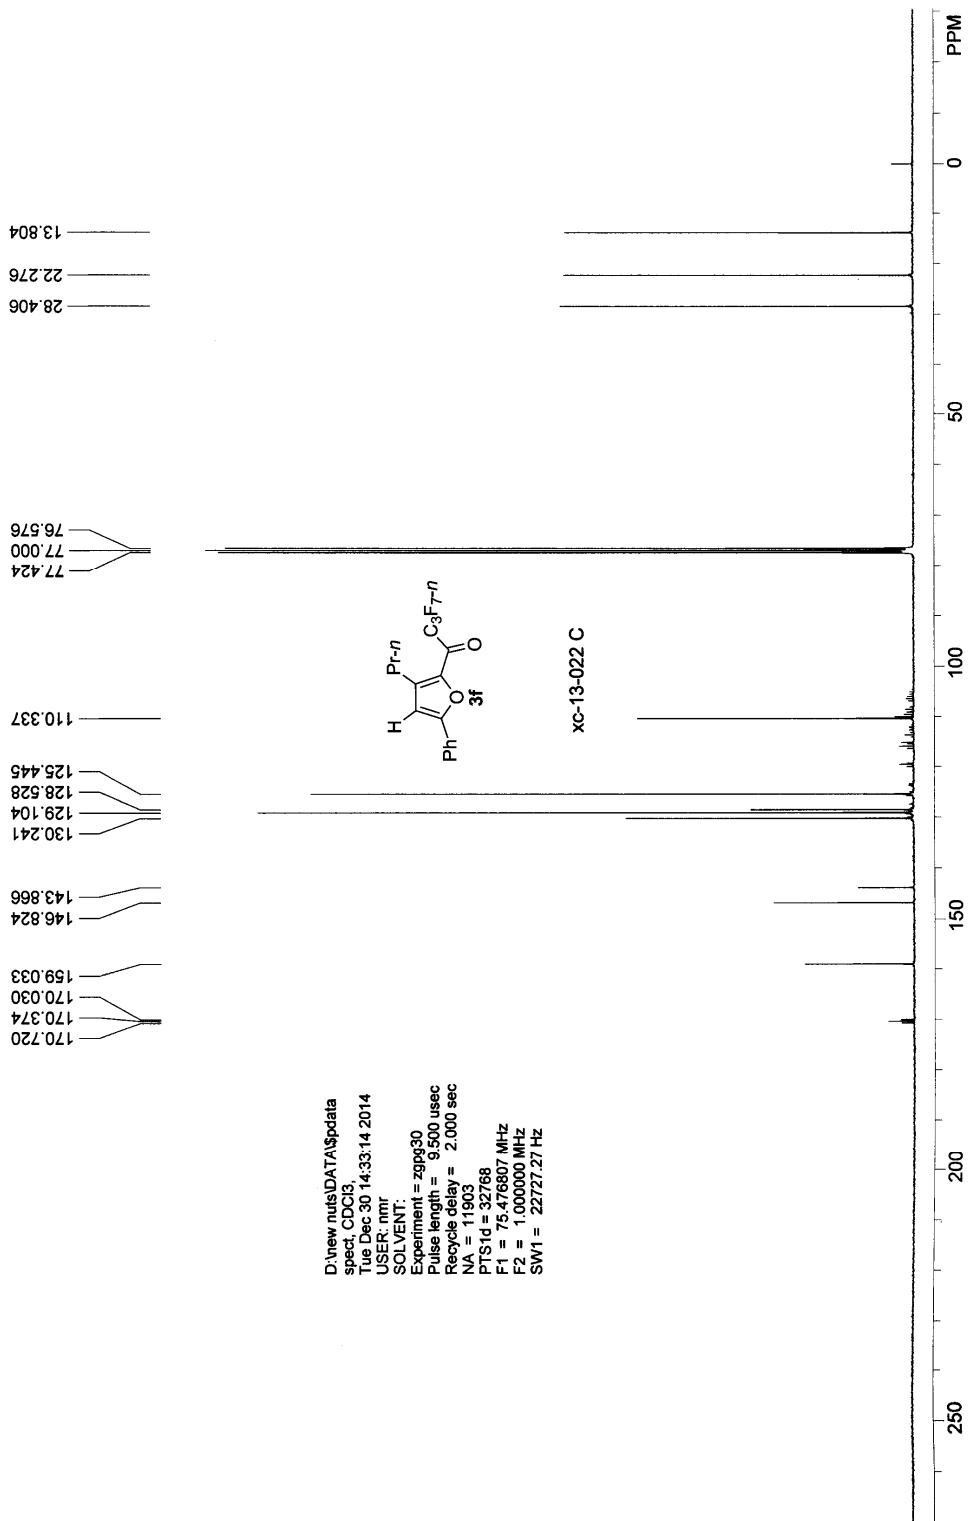



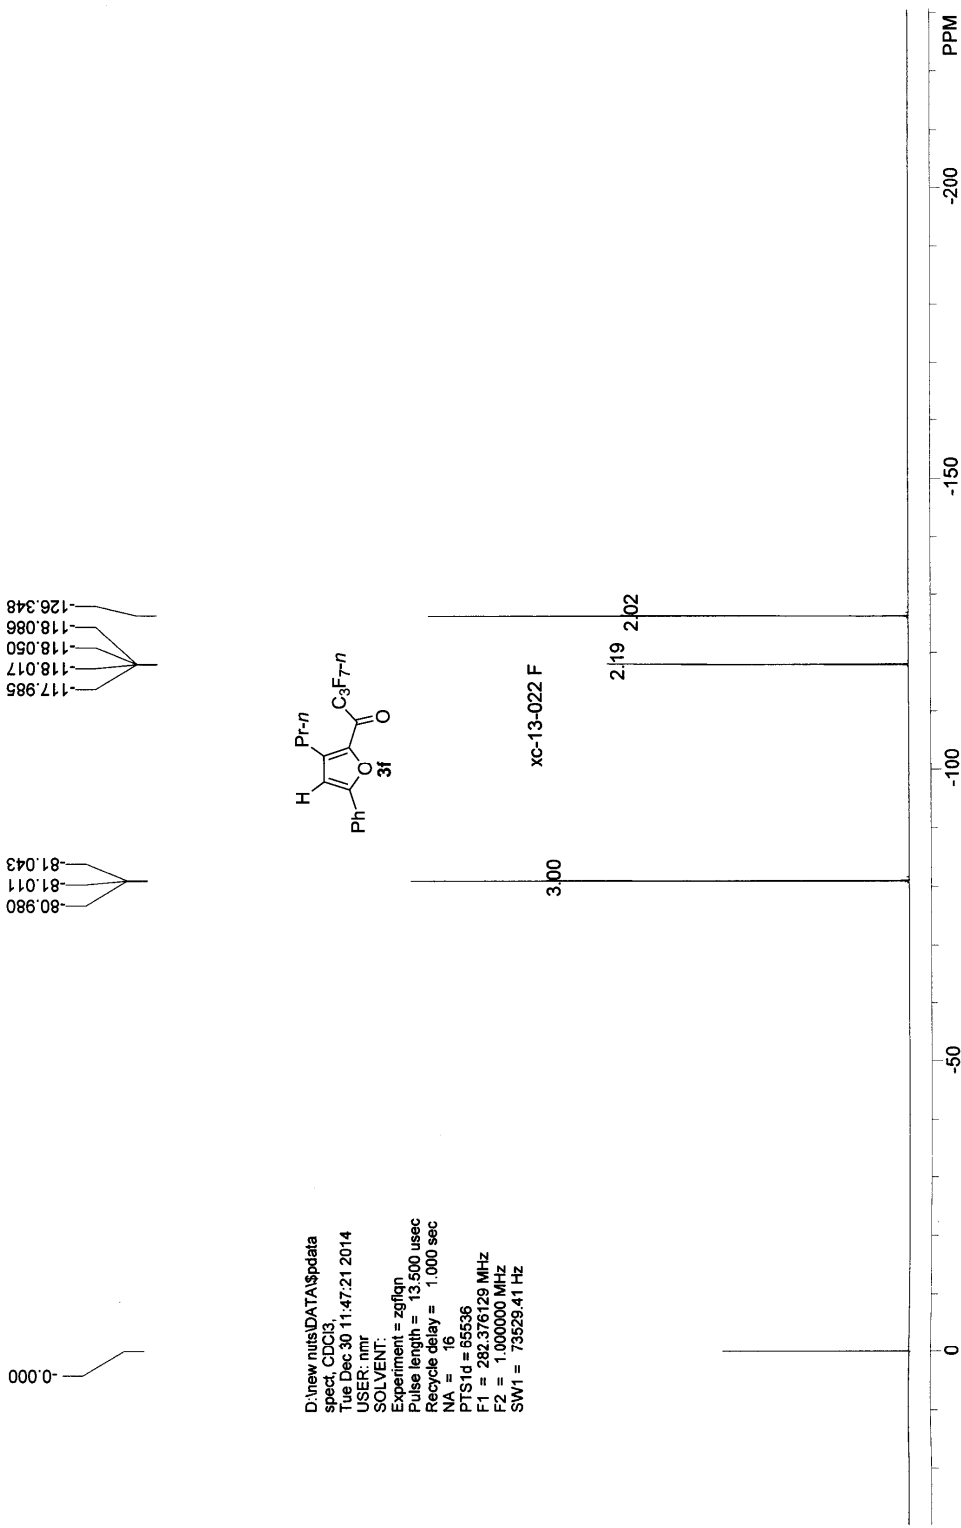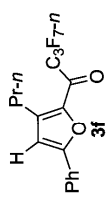

D:\new nusi\DATA\spdata  
 spect, CDC13,  
 Tue Dec 30 11:47:21 2014  
 USER: nmr  
 SOLVENT:  
 Experiment = zgfgn  
 Pulse length = 13.500 usec  
 Recycle delay = 1.000 sec  
 NA = 16  
 PTS1d = 65536  
 F1 = 282.376129 MHz  
 F2 = 1.000000 MHz  
 SW1 = 73529.41 Hz

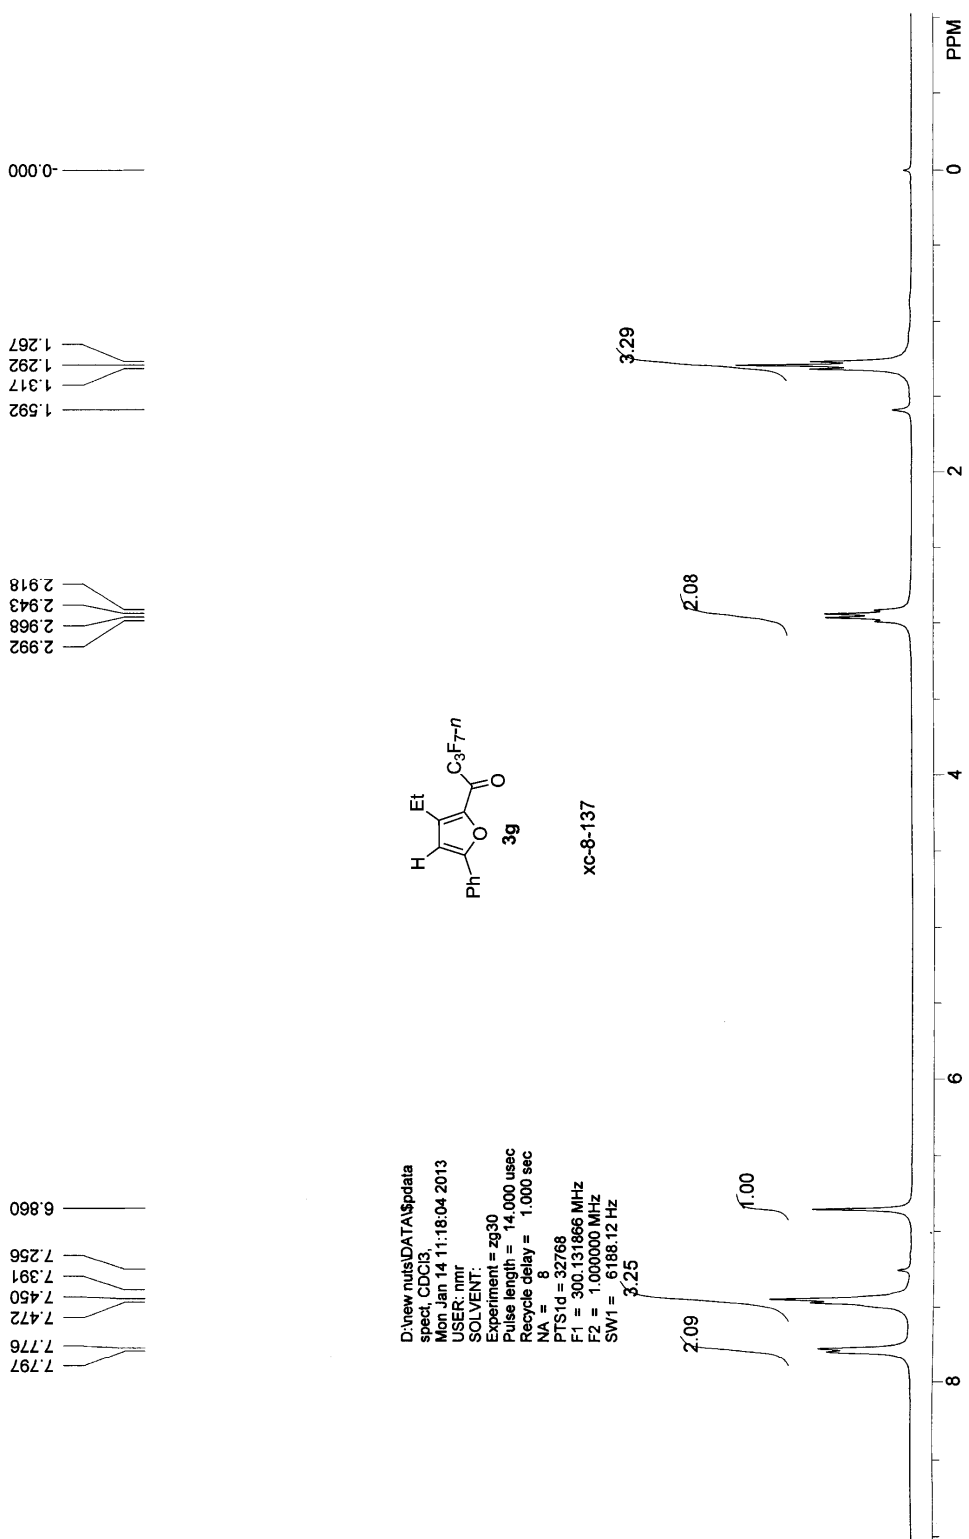

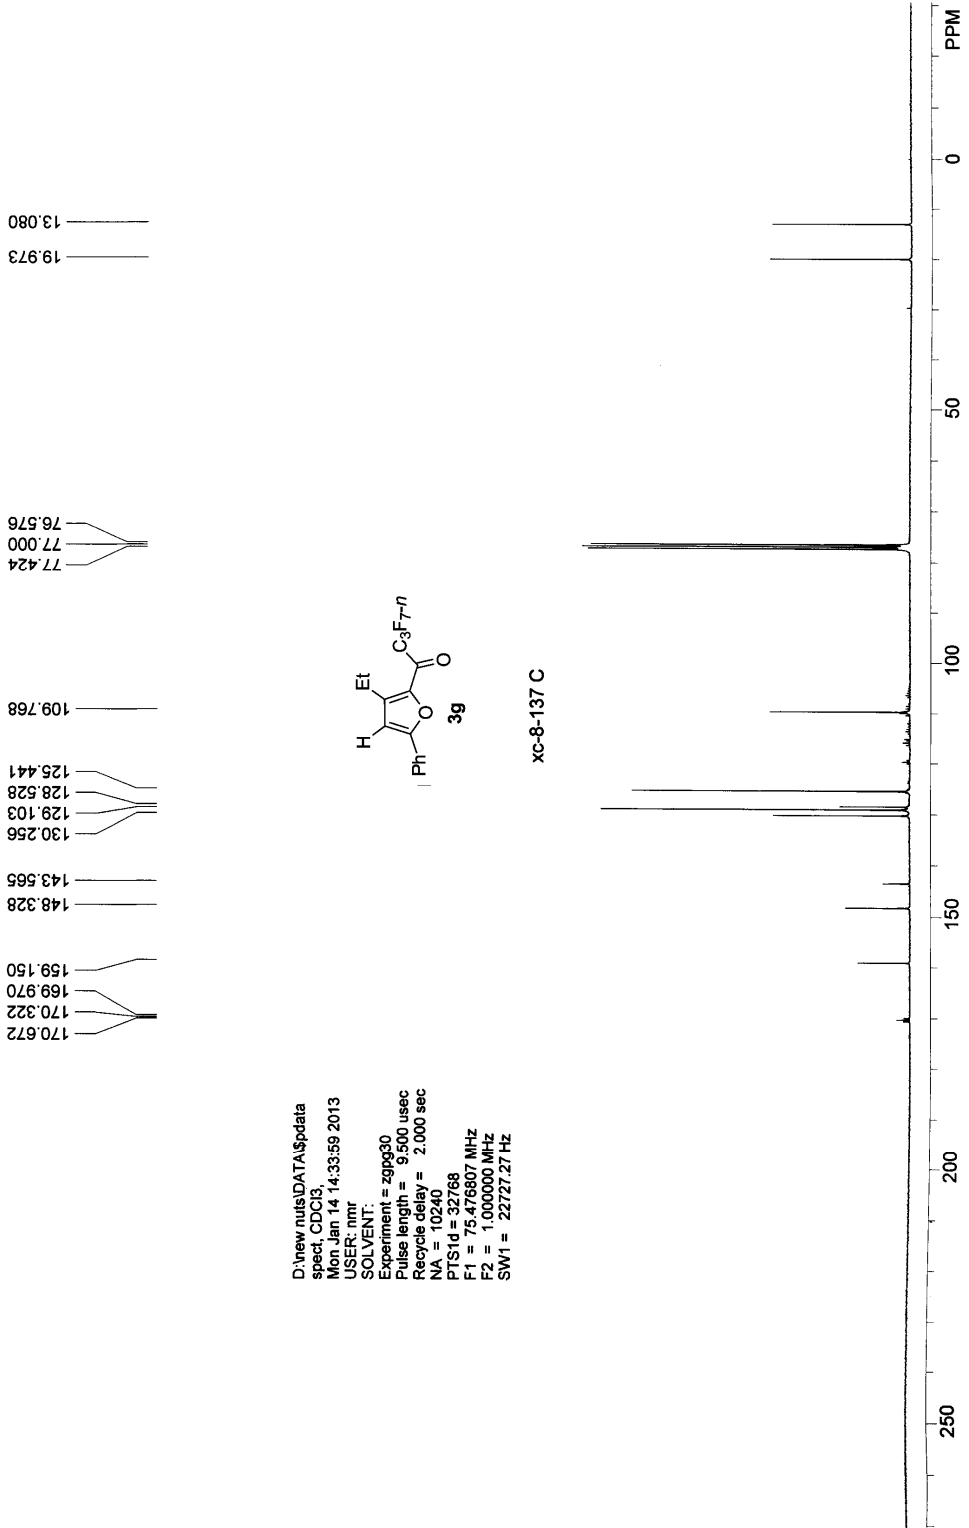

D:\new nuts\DATA\data  
spect, CDC13,  
Mon Jan 14 14:33:59 2013  
USER: nmr  
SOLVENT:  
Experiment = zppg30  
Pulse length = 9.500 usec  
Recycle delay = 2.000 sec  
NA = 10240  
PTSD1 = 32768  
F1 = 75.476807 MHz  
F2 = 1.000000 MHz  
SW1 = 22727.27 Hz

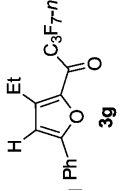

xc-8-137 C

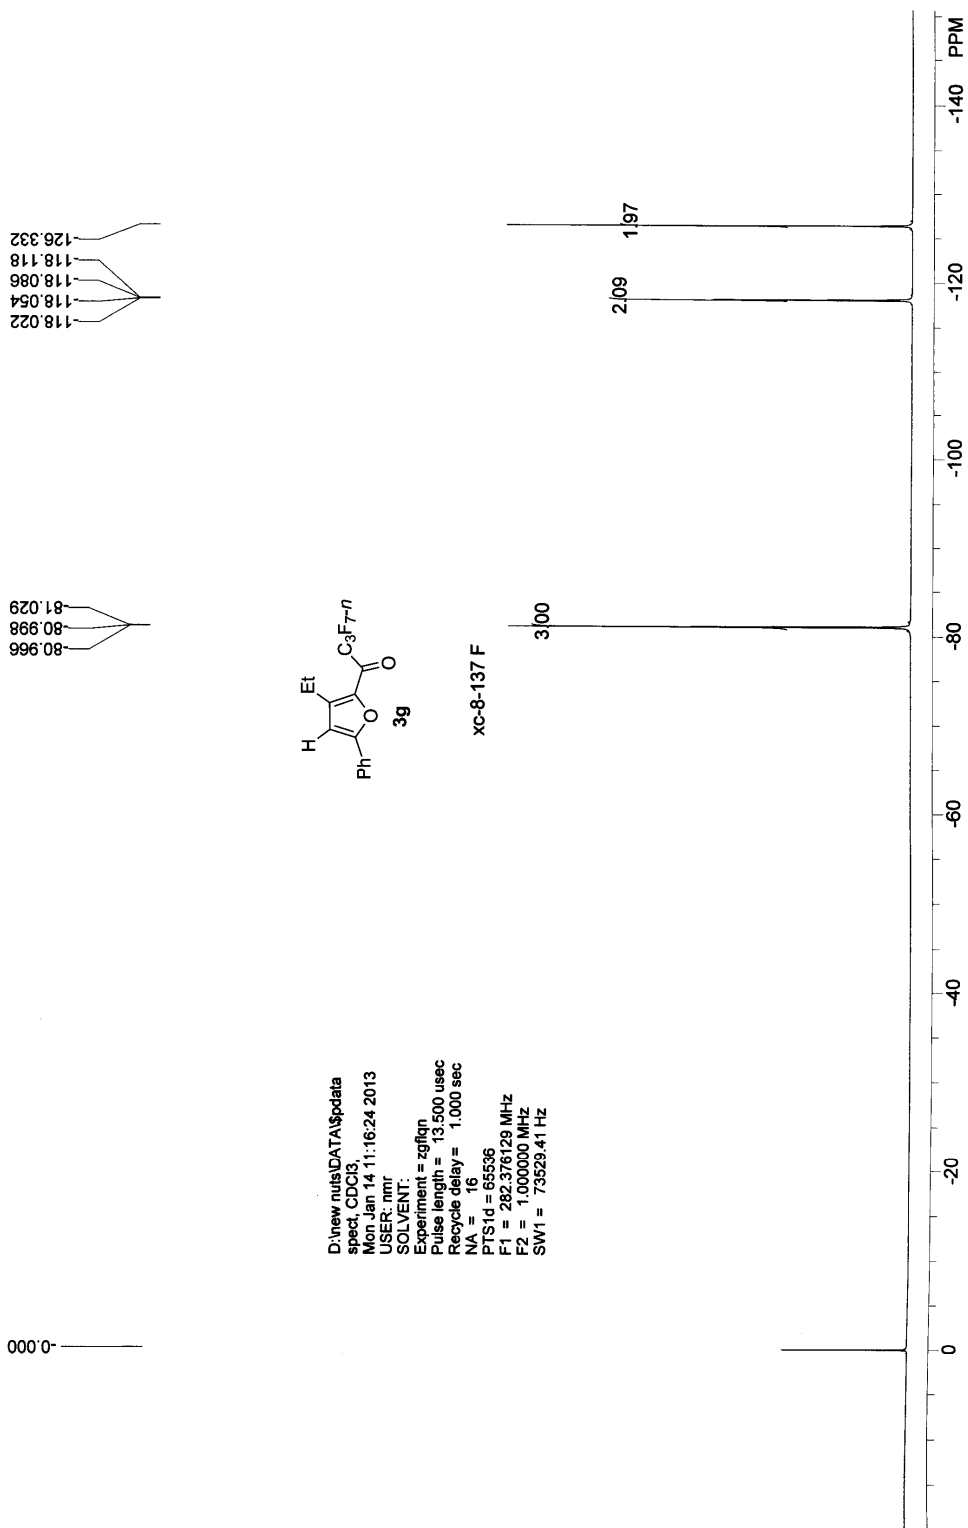

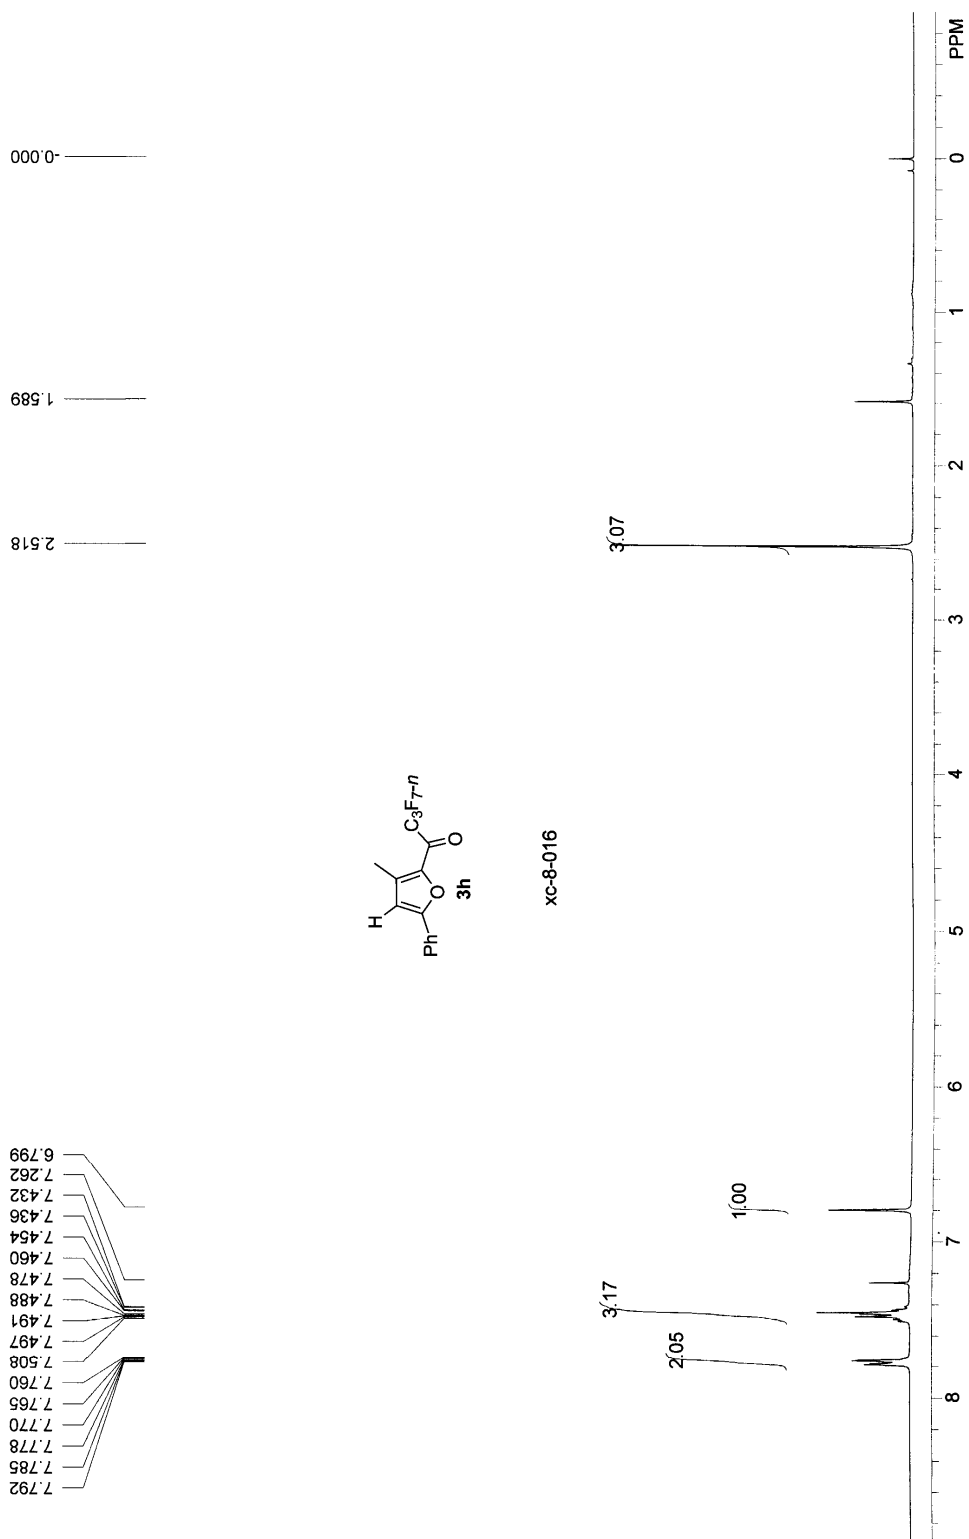

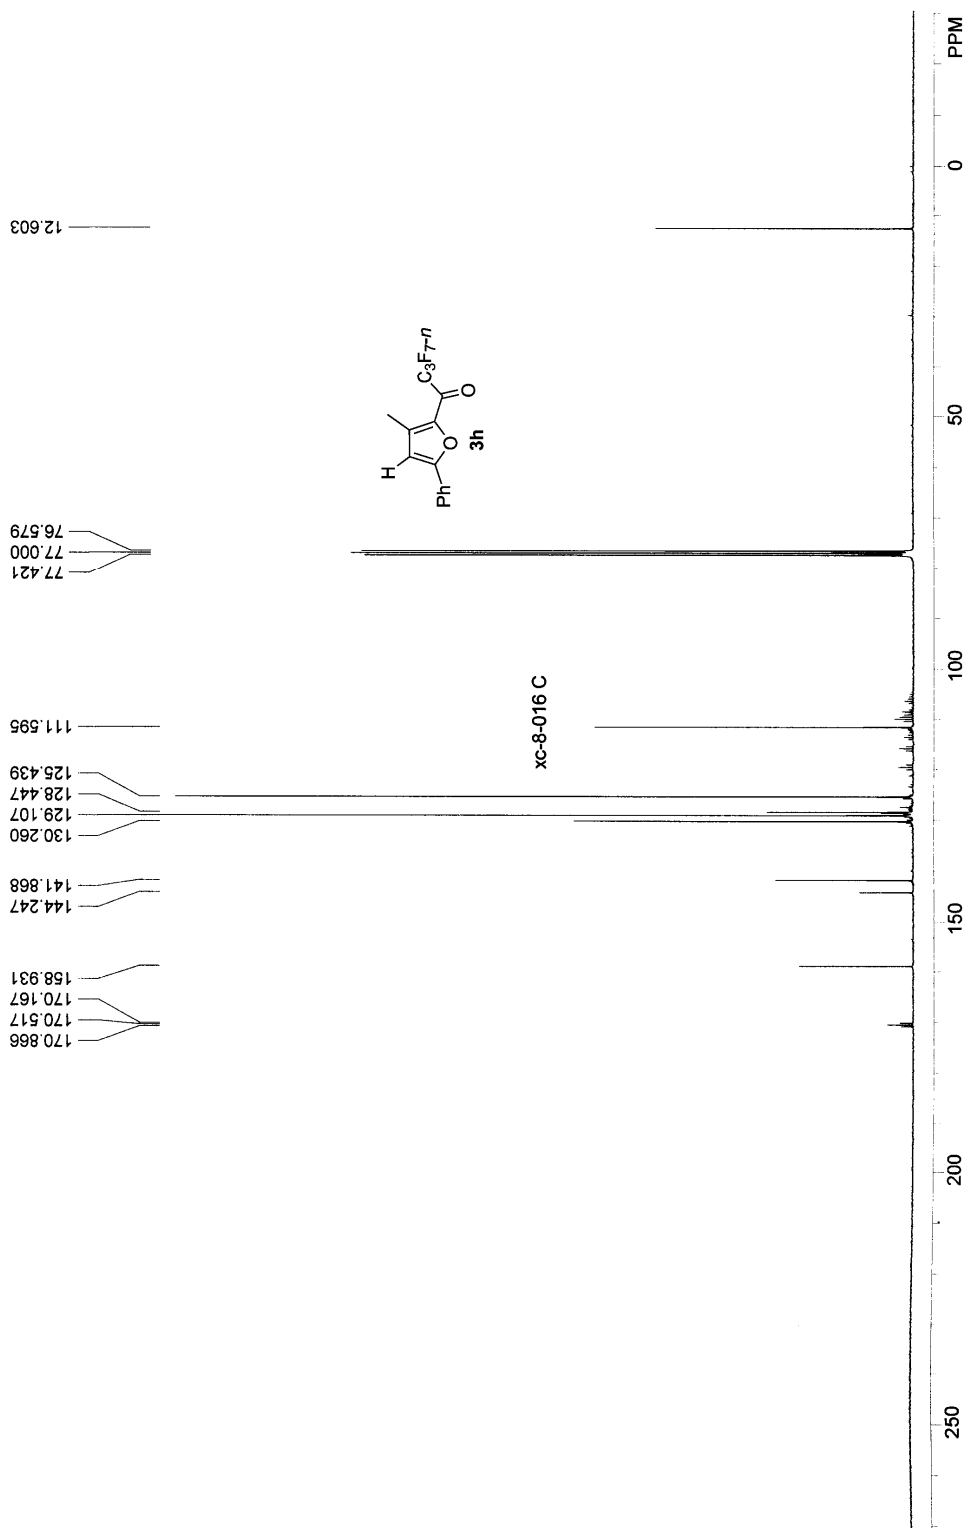

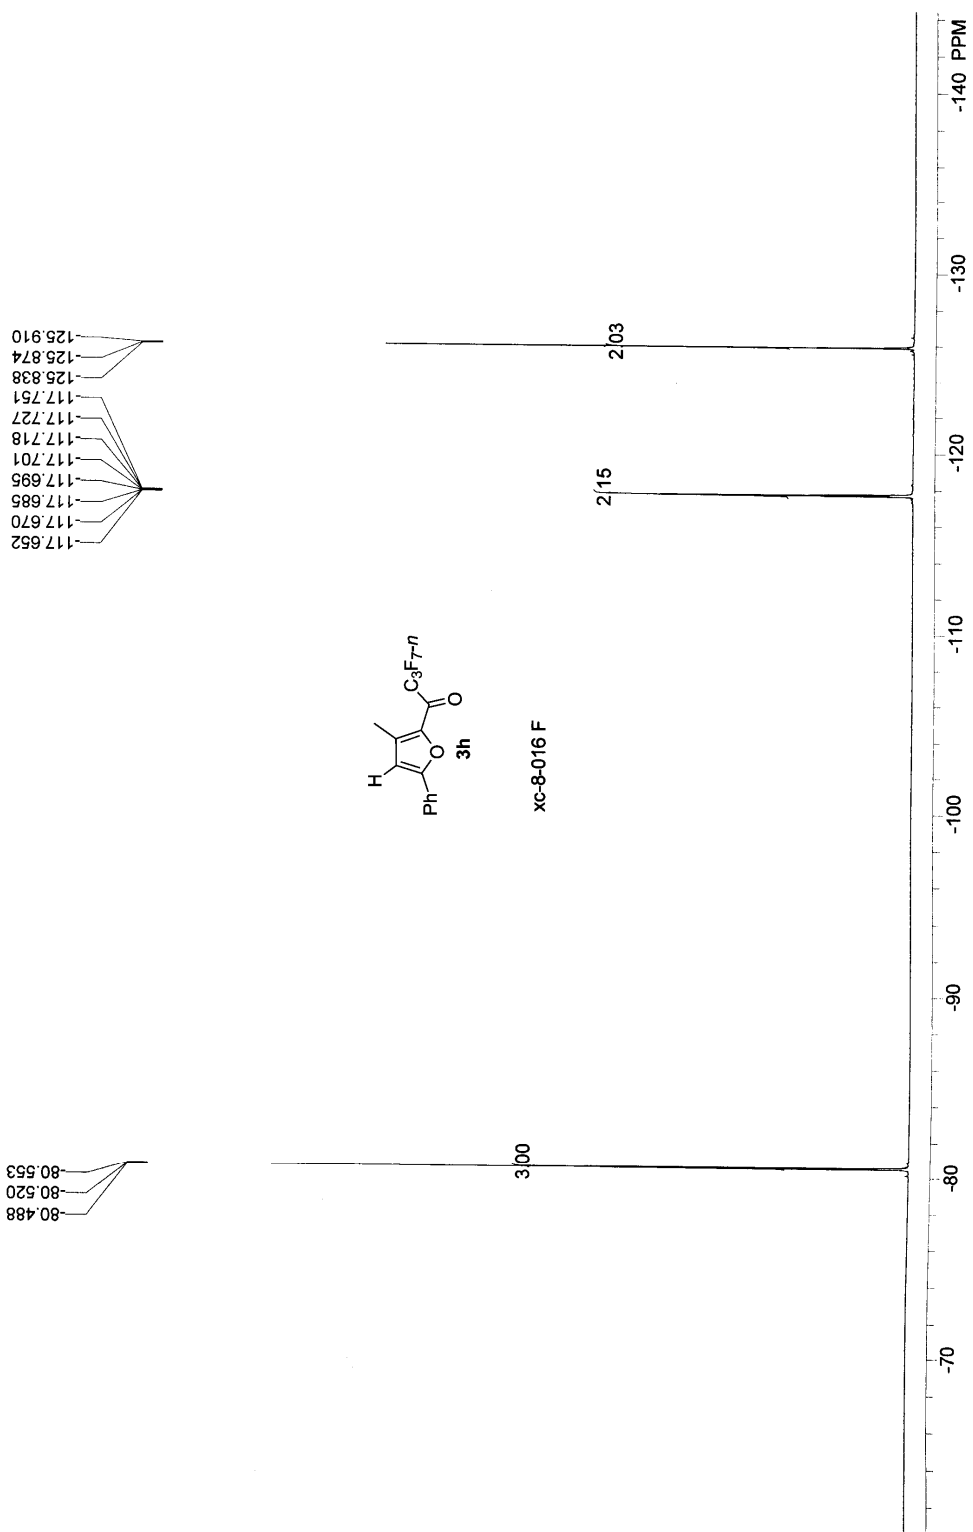

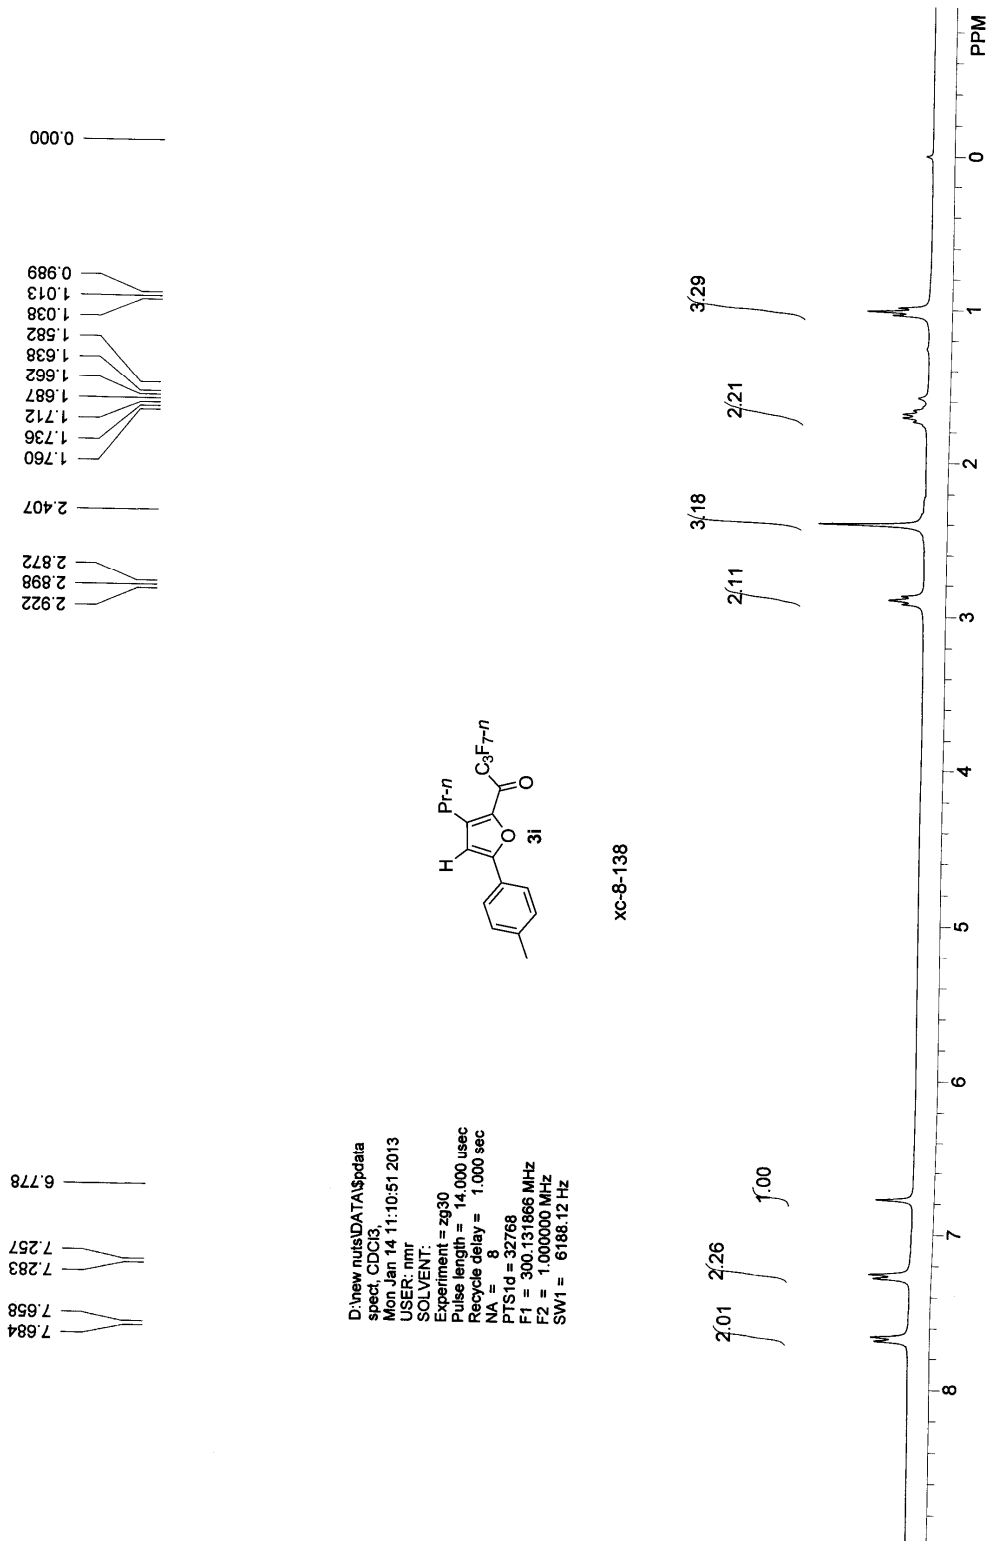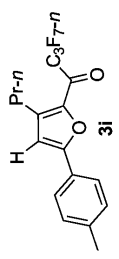

XC-8-138

D:\new nmr\DATA\spdata  
 spect, CDCl3,  
 Mon Jan 14 11:10:51 2013  
 USER: nmr  
 SOLVENT:  
 Experiment = zg30  
 Pulse length = 14.000 usec  
 Recycle delay = 1.000 sec  
 NA = 8  
 P1 = 32768  
 F1 = 300.131866 MHz  
 F2 = 1.000000 MHz  
 SW1 = 6188.12 Hz



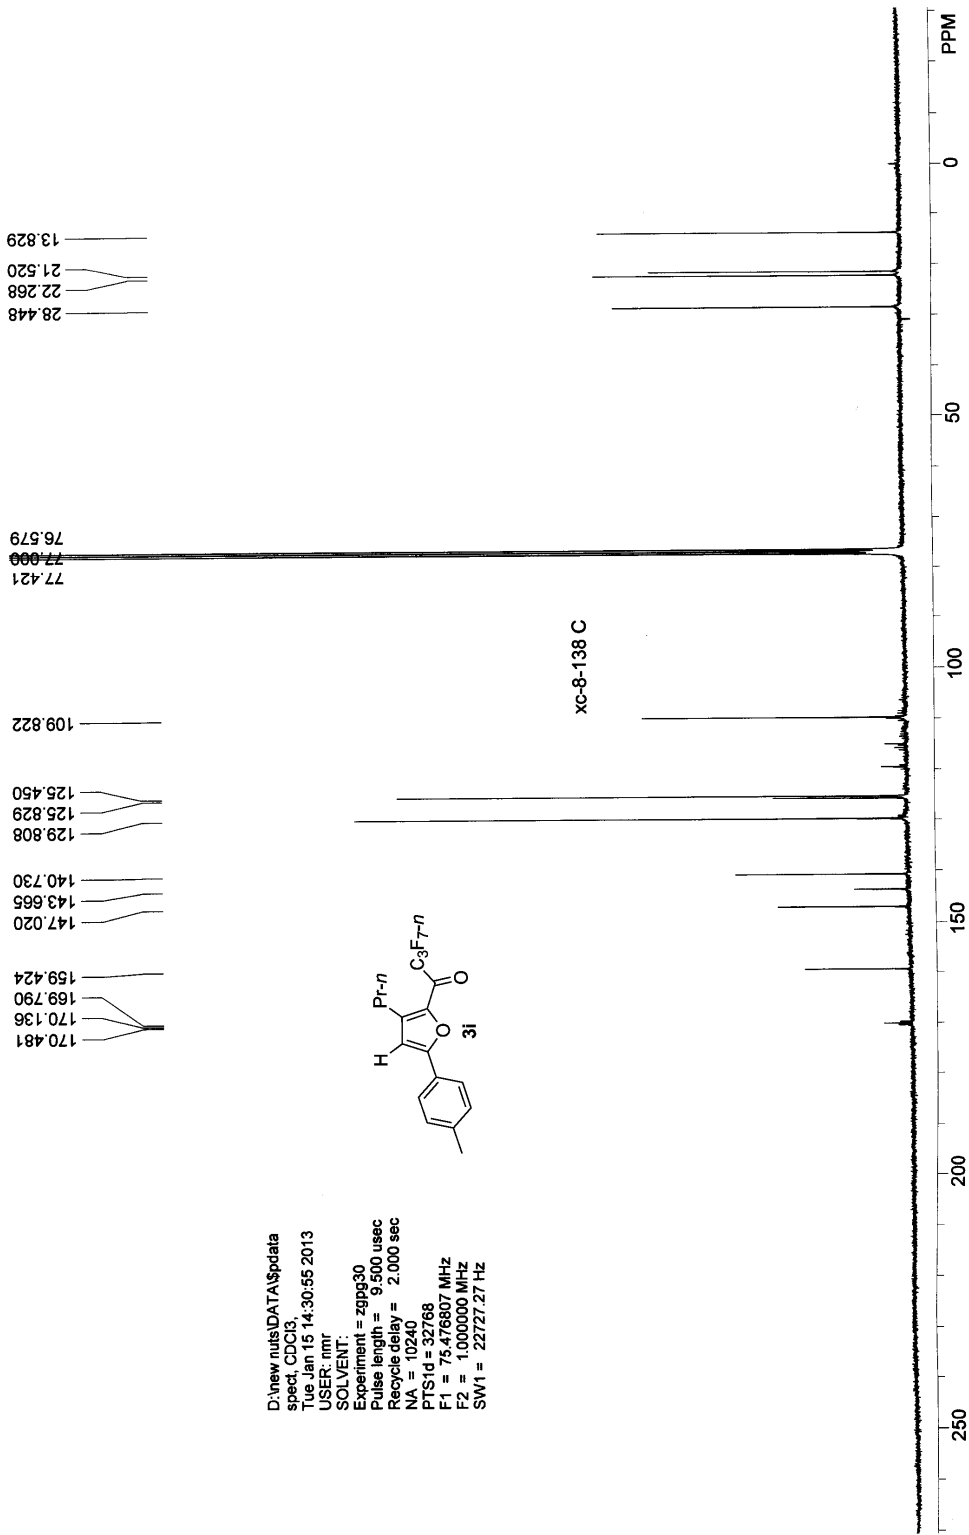

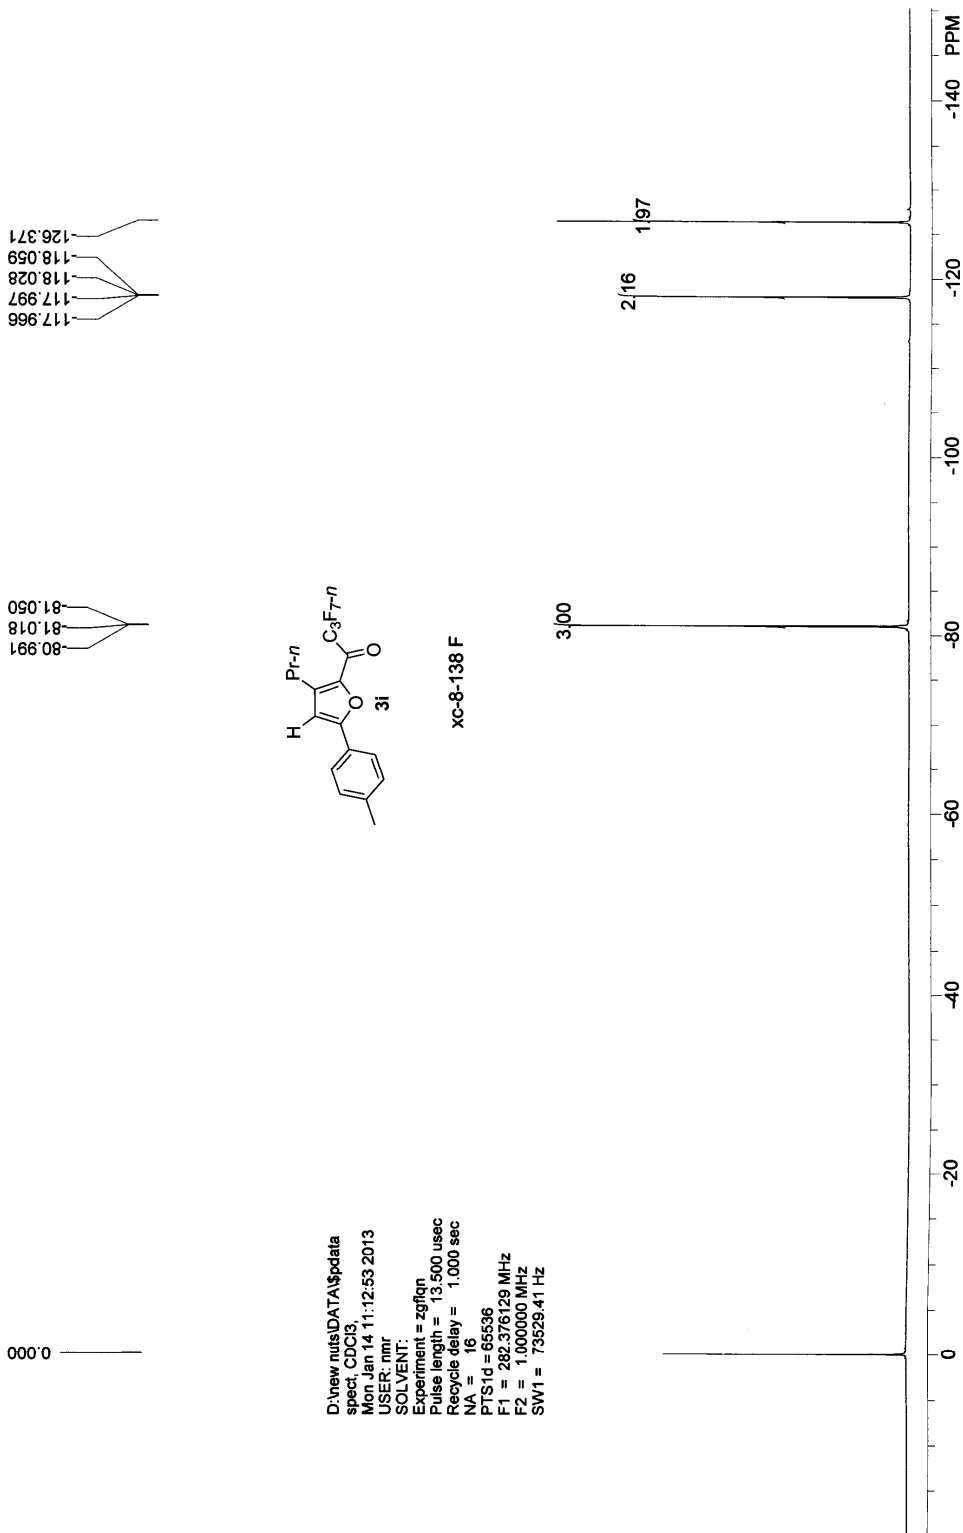

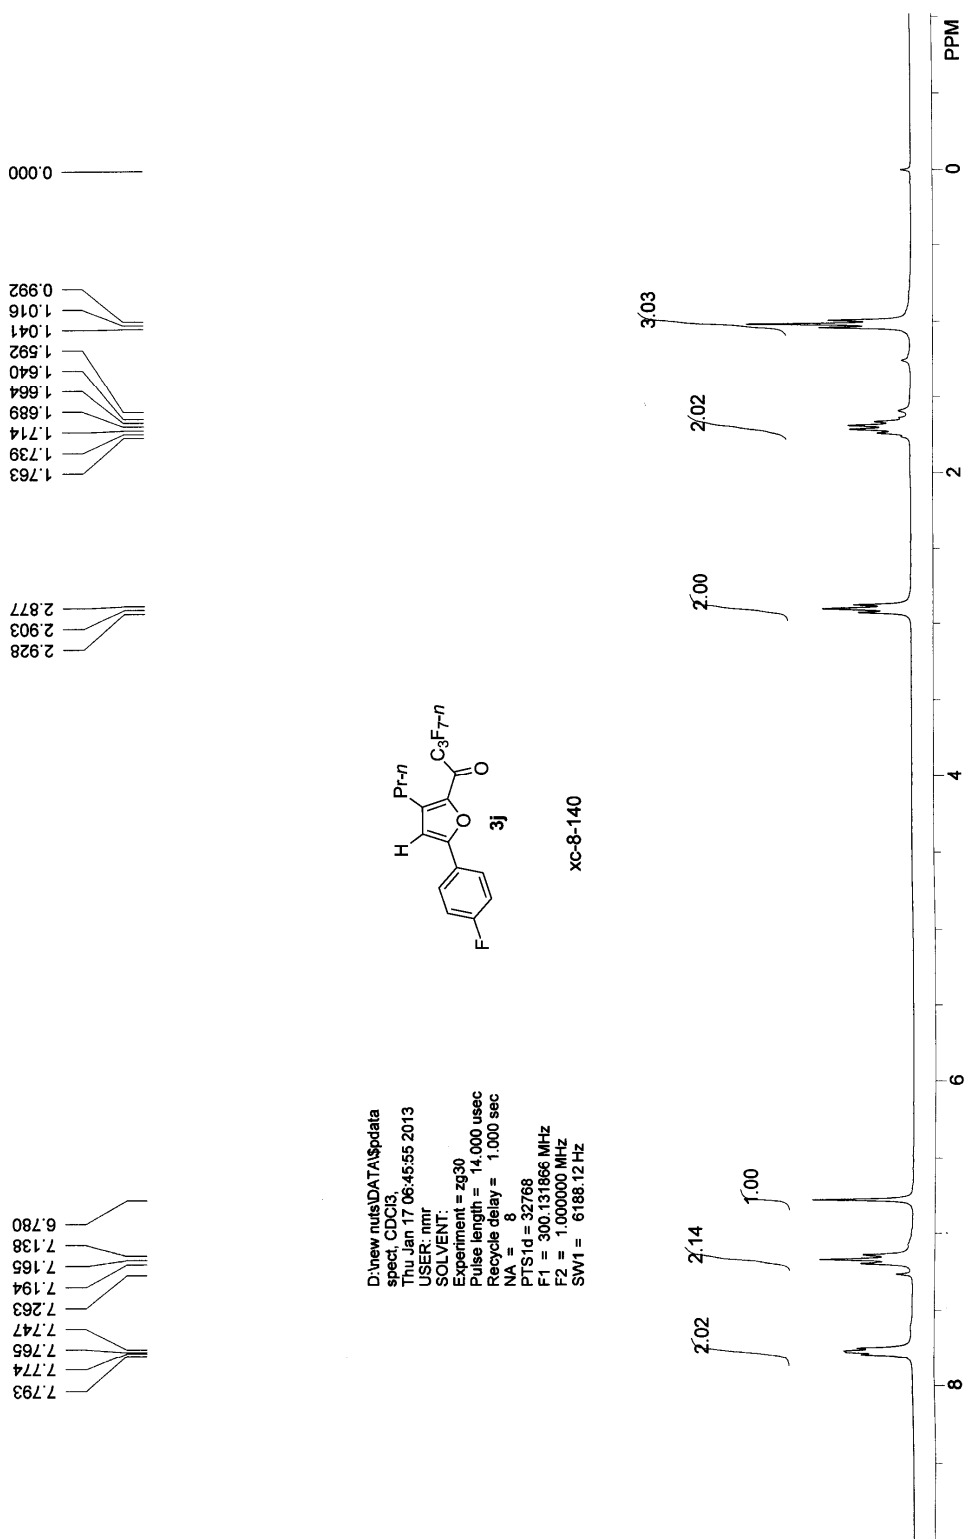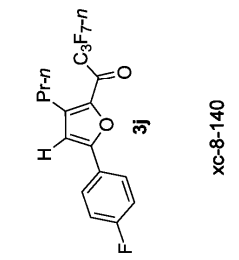

D:\new\_nuts\DATA\1Sp\data  
 spect, CDC18,  
 Thu Jan 17 06:45:55 2013  
 USER: nmr  
 SOLVENT:  
 Experiment = zg30  
 Pulse length = 14.000 usec  
 Recycle delay = 1.000 sec  
 NA = 8  
 P1 = 32768  
 F1 = 300.131866 MHz  
 F2 = 1.000000 MHz  
 SW1 = 6188.12 Hz

7.793  
 7.774  
 7.765  
 7.747  
 7.263  
 7.194  
 7.165  
 7.138  
 6.780

2.928  
 2.903  
 2.877

1.763  
 1.739  
 1.714  
 1.689  
 1.664  
 1.640  
 1.592  
 1.041  
 1.016  
 0.992

0.000

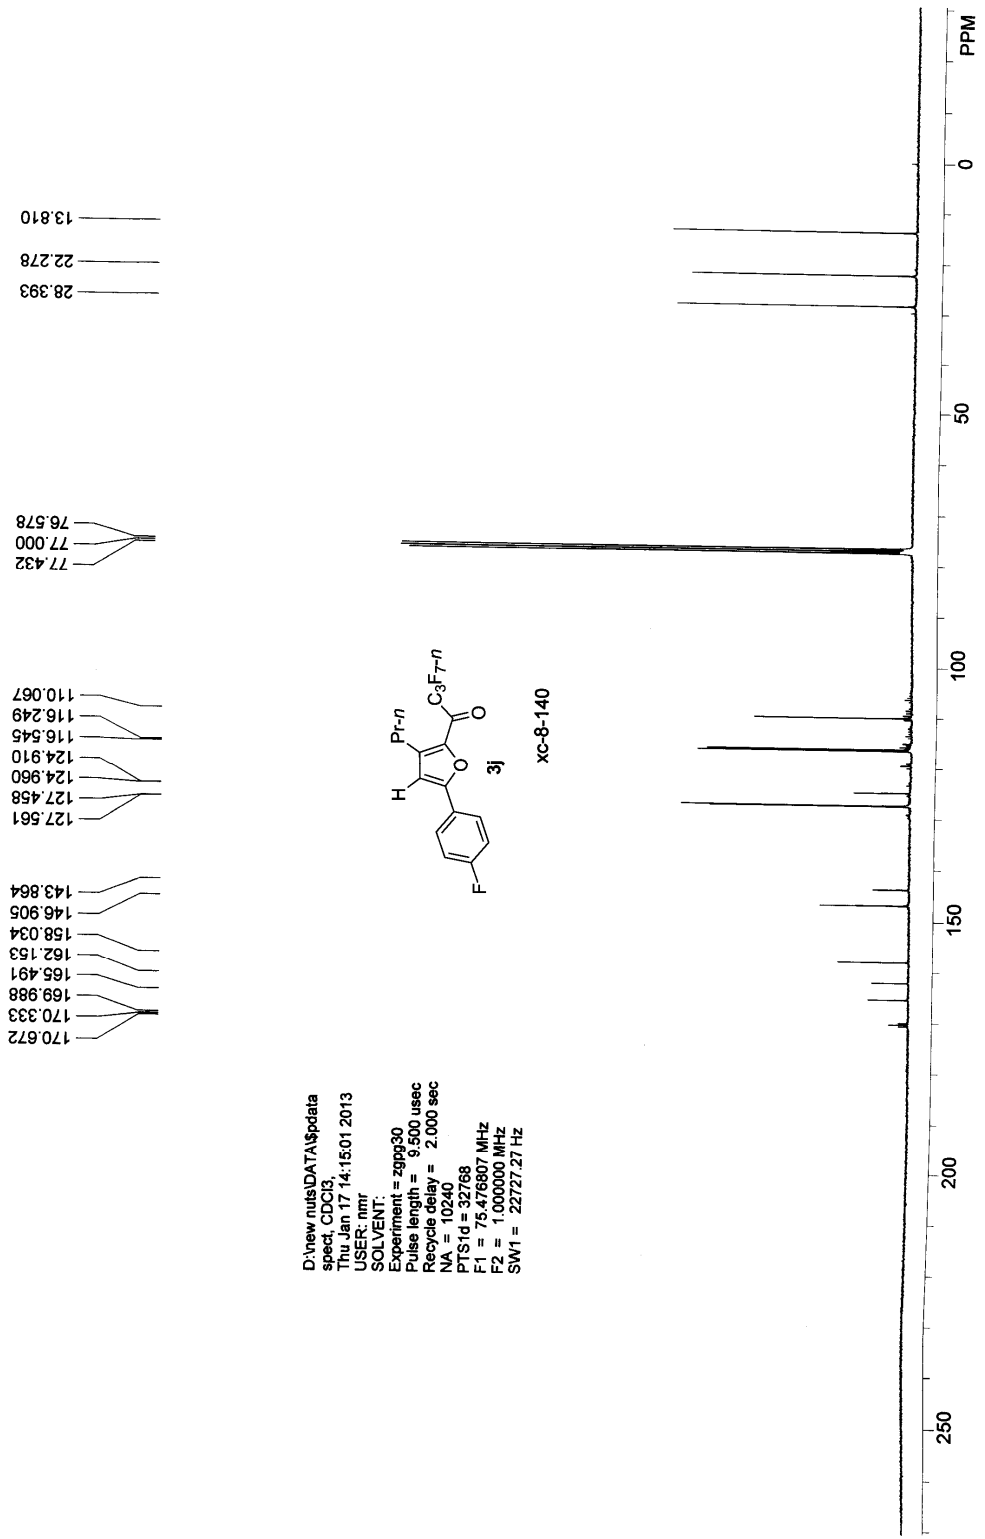

D:\new\_nuts\DATA\spdata  
 spect, CDCl3,  
 Thu Jan 17 14:15:01 2013  
 USER: nmr  
 SOLVENT:  
 Experiment = zgpg30  
 Pulse length = 9.500 usec  
 Recycle delay = 2.000 sec  
 NA = 10240  
 P1 = 32768  
 F1 = 75.476807 MHz  
 F2 = 1.000000 MHz  
 SW1 = 22727.27 Hz

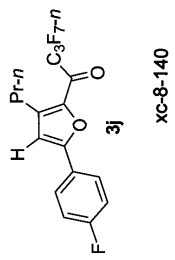

126.361  
118.092  
118.060  
118.028  
117.997  
109.481  
109.466  
109.453  
109.434  
109.416  
109.406  
109.386

81.030  
80.998  
80.967

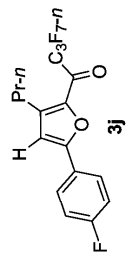

xc-g-140 F

D:\new nuts\DATA\pdata  
spect, CDC13,  
Thu Jan 17 06:49:33 2013  
USER: nmr  
SOLVENT:  
Experiment = zgfgin  
Pulse length = 13.500 usec  
Recycle delay = 1.000 sec  
NA = 16  
PTS1d = 66536  
F1 = 282.376129 MHz  
F2 = 1.000000 MHz  
SW1 = 73529.41 Hz

0.000

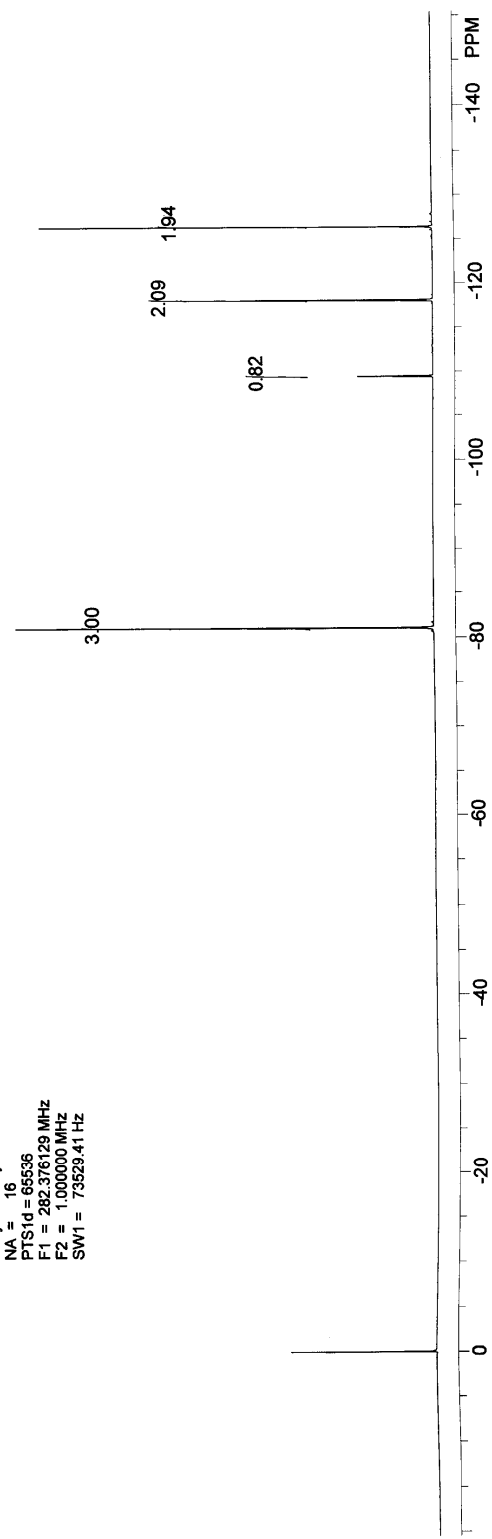

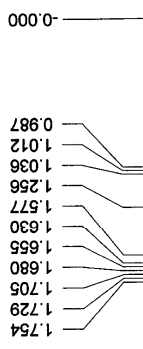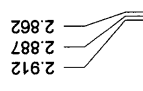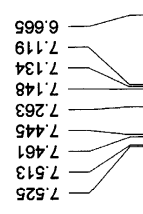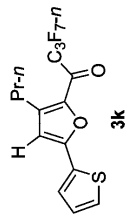

D:\new nuts\DATA\spdata  
 spect, CDC13,  
 Thu Jan 17 05:48:39 2013  
 USER: nmr  
 SOLVENT:  
 Experiment = z930  
 Pulse length = 14,000 usec  
 Recycle delay = 1,000 sec  
 NA = 8  
 P1S1d = 32768  
 F1 = 300.131866 MHz  
 F2 = 1.000000 MHz  
 SW1 = 6188.12 Hz

xc-8-142

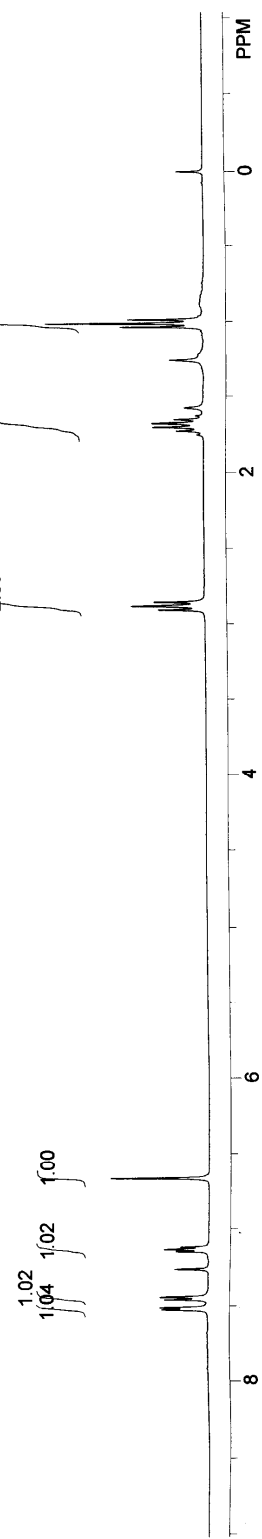

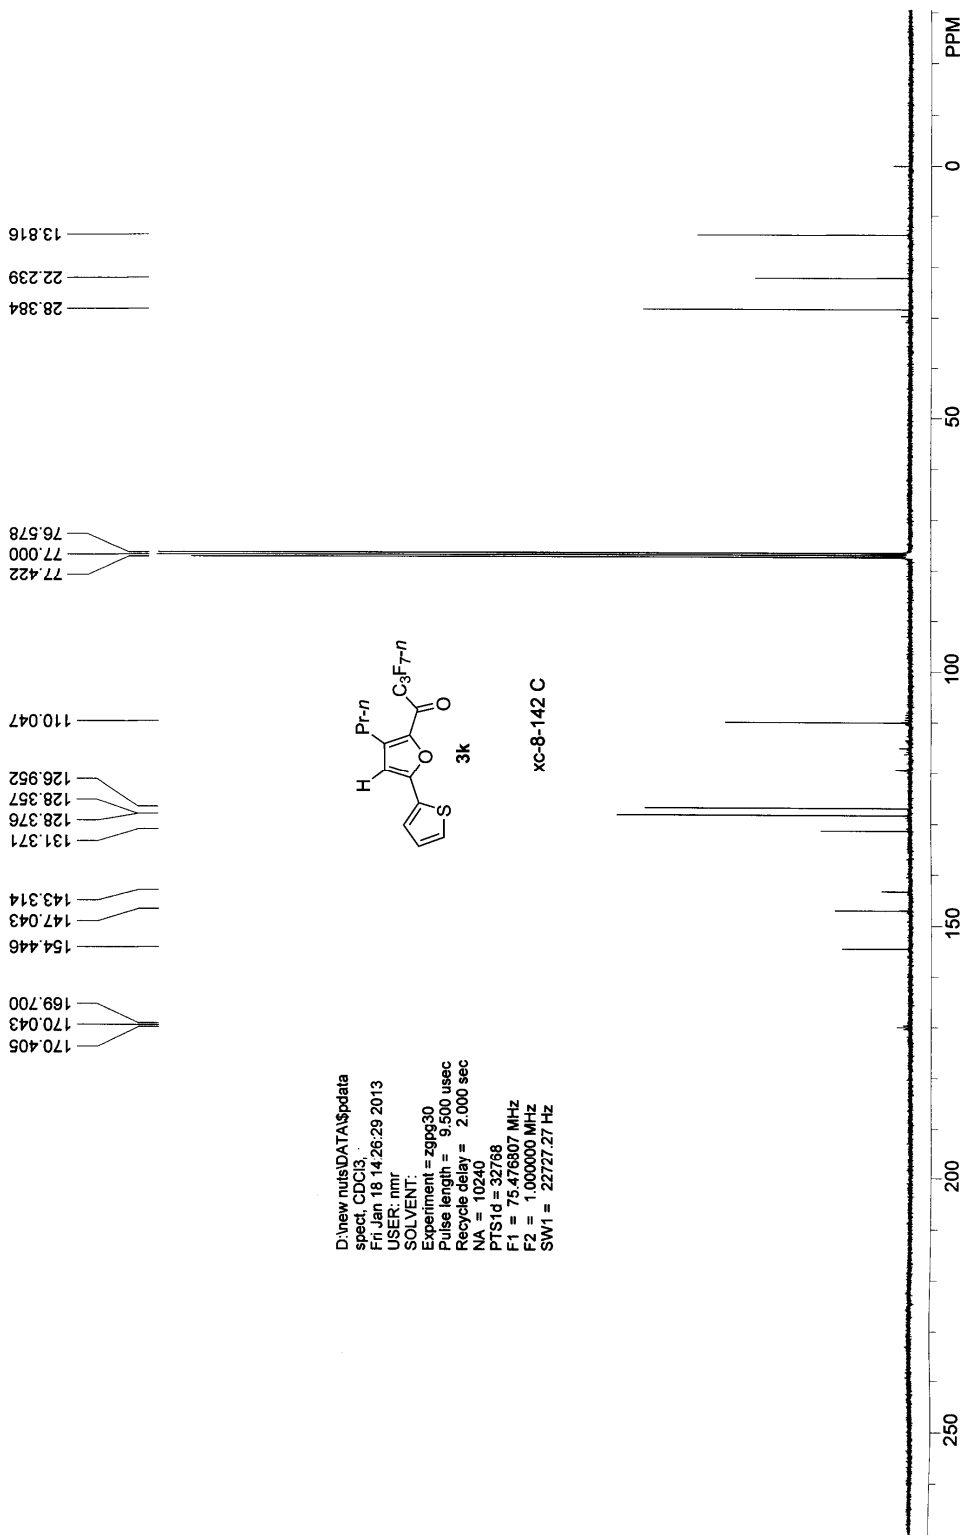

126.373  
126.337  
126.301  
118.066  
118.034  
118.003  
117.972

81.081  
81.049  
81.017

0.000

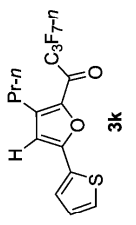

XC-8-142 F

D:\new nuts\DATA\spdata  
spect\_CDC13  
Thu Jan 17 05:51:23 2013  
USER: lmr  
SOLVENT:  
Experiment = zgfgn  
Pulse length = 13.500 usec  
Recycle delay = 1.000 sec  
NA = 16  
PTS1d = 65536  
F1 = 282.376129 MHz  
F2 = 1.000000 MHz  
SW1 = 73529.41 Hz

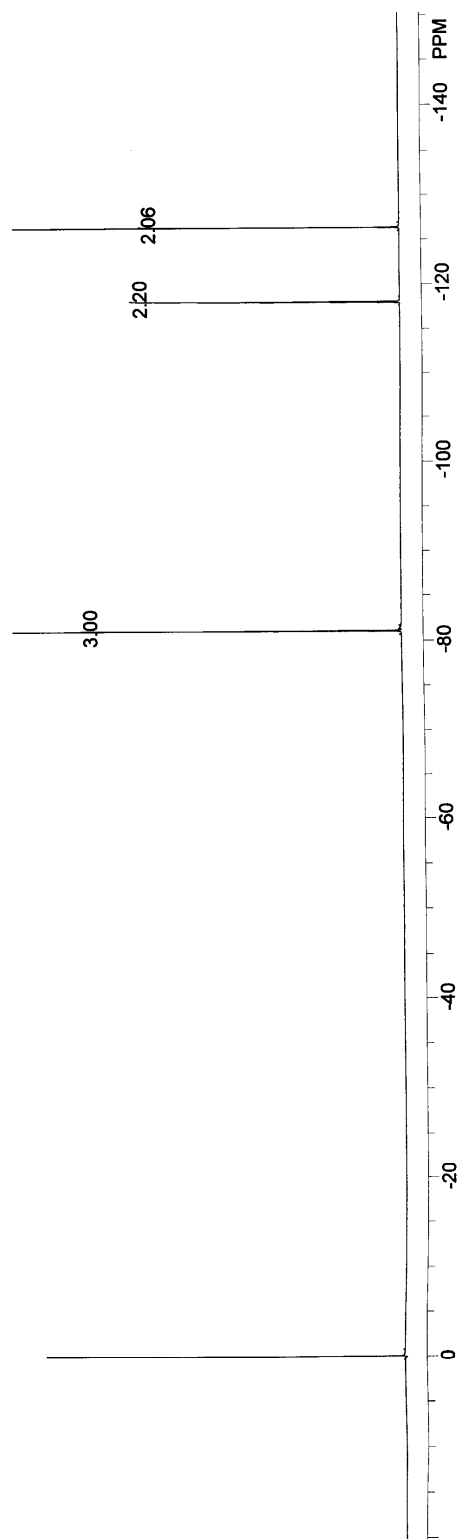



0.000  
1.303  
1.260  
0.902  
0.881  
0.856  
0.831

7.246

D:\new nuts\DATA\spdata  
spect, CDCI3,  
Wed Jan 14 09:03:54 2009  
USER: nmr  
SOLVENT:  
Experiment = zg30  
Pulse length = 14.000 usec  
Recycle delay = 1.000 sec  
NA = 8  
PTS1d = 32768  
F1 = 300.131866 MHz  
F2 = 1.000000 MHz  
SW1 = 6188.12 Hz

PE

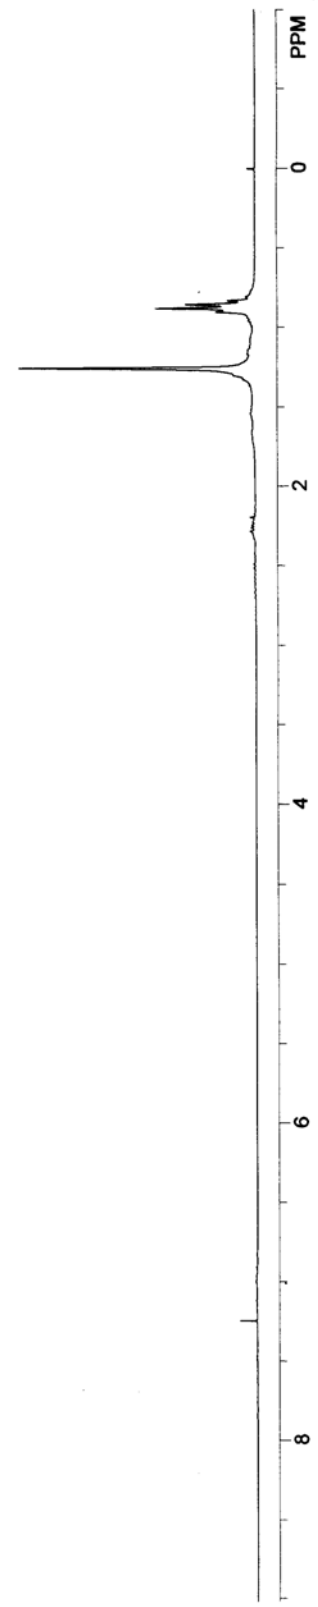

29.708

77.422  
77.000  
76.576

PE

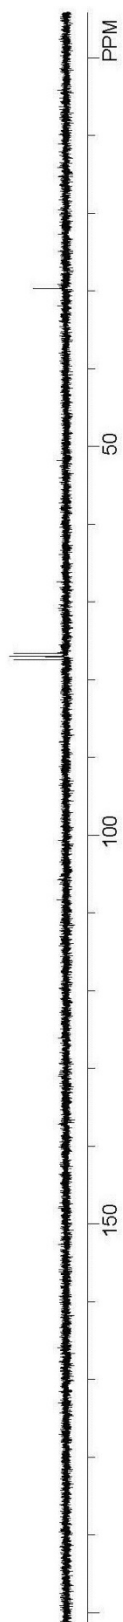

Supplement: c6qo00001k1.pdf [file c6qo00001k1.pdf]
